# Supplementary material for: Development of a video camera-type kayak motion capture system to measure water kayaking
Source: PeerJ. 2023 Jul 21;11:e15227. doi: 10.7717/peerj.15227 (PMC10364805; doi:10.7717/peerj.15227)
Supplement: Supplemental Information 1 [file peerj-11-15227-s001.xlsx]

## Sheet: Participants 1
Row data
	Video camera-type kayak motion capture system			Optical motion capture system
Frame	Tilt	Turn	Rotation	Tilt	Turn	Rotation
1260	-25.7818	1.09613	-4.08411	-24.8738	1.4378	-4.14766
1261	-25.7723	1.04258	-4.3233	-24.8375	1.3723	-4.40295
1262	-25.7586	0.990578	-4.56738	-24.8039	1.30487	-4.66111
1263	-25.741	0.940471	-4.81645	-24.7733	1.23567	-4.92149
1264	-25.7199	0.892581	-5.07056	-24.7455	1.16496	-5.1834
1265	-25.6959	0.847209	-5.32975	-24.7206	1.09313	-5.4462
1266	-25.6693	0.804625	-5.59402	-24.6982	1.02066	-5.70922
1267	-25.6406	0.765072	-5.86331	-24.678	0.948132	-5.97183
1268	-25.6103	0.728765	-6.13755	-24.6597	0.876174	-6.23343
1269	-25.579	0.695887	-6.41659	-24.6427	0.80546	-6.49345
1270	-25.5471	0.666591	-6.70025	-24.6266	0.736674	-6.75133
1271	-25.5151	0.641001	-6.98828	-24.611	0.670487	-7.00656
1272	-25.4836	0.619209	-7.28039	-24.5954	0.60753	-7.25864
1273	-25.4529	0.601283	-7.5762	-24.5796	0.548376	-7.50713
1274	-25.4235	0.58726	-7.87528	-24.5633	0.49352	-7.75164
1275	-25.3959	0.577155	-8.17713	-24.5466	0.443372	-7.99183
1276	-25.3704	0.570957	-8.48117	-24.5296	0.398247	-8.22741
1277	-25.3475	0.568639	-8.78678	-24.5125	0.35837	-8.4582
1278	-25.3274	0.570152	-9.09323	-24.4958	0.323877	-8.68407
1279	-25.3105	0.575434	-9.39976	-24.4802	0.294822	-8.905
1280	-25.2971	0.584413	-9.70555	-24.4662	0.27119	-9.12106
1281	-25.2875	0.597003	-10.0097	-24.4547	0.252908	-9.3324
1282	-25.2819	0.613118	-10.3113	-24.4464	0.239854	-9.53928
1283	-25.2806	0.632663	-10.6095	-24.4421	0.231868	-9.74204
1284	-25.2838	0.655544	-10.9032	-24.4426	0.228765	-9.94109
1285	-25.2916	0.681669	-11.1914	-24.4484	0.230344	-10.1369
1286	-25.3042	0.710946	-11.4733	-24.4601	0.236397	-10.3299
1287	-25.3216	0.743287	-11.7479	-24.4782	0.246725	-10.5205
1288	-25.3439	0.778609	-12.0143	-24.5028	0.261148	-10.7093
1289	-25.3711	0.816833	-12.2716	-24.5339	0.279523	-10.8965
1290	-25.4033	0.857885	-12.5192	-24.5714	0.301753	-11.0824
1291	-25.4403	0.901691	-12.7563	-24.615	0.327803	-11.267
1292	-25.482	0.948182	-12.9824	-24.664	0.357706	-11.45
1293	-25.5282	0.997289	-13.197	-24.7177	0.391561	-11.6313
1294	-25.5788	1.04894	-13.3996	-24.7751	0.429525	-11.8101
1295	-25.6336	1.10307	-13.5901	-24.8352	0.47179	-11.9856
1296	-25.6922	1.1596	-13.7682	-24.8968	0.518551	-12.1568
1297	-25.7543	1.21844	-13.9341	-24.9588	0.569971	-12.3224
1298	-25.8196	1.27951	-14.0876	-25.0199	0.626129	-12.4811
1299	-25.8878	1.34271	-14.229	-25.0793	0.686986	-12.6315
1300	-25.9585	1.40794	-14.3586	-25.1359	0.752343	-12.7721
1301	-26.0313	1.47509	-14.4766	-25.1893	0.821818	-12.9018
1302	-26.1059	1.54403	-14.5836	-25.2388	0.894837	-13.0194
1303	-26.182	1.61463	-14.6801	-25.2845	0.970645	-13.1241
1304	-26.2591	1.68677	-14.7665	-25.3263	1.04833	-13.2154
1305	-26.3371	1.76029	-14.8435	-25.3647	1.12685	-13.293
1306	-26.4156	1.83505	-14.9117	-25.3999	1.20512	-13.3573
1307	-26.4944	1.91091	-14.9717	-25.4328	1.28203	-13.4086
1308	-26.5733	1.9877	-15.0241	-25.4639	1.35652	-13.4479
1309	-26.6521	2.06528	-15.0696	-25.4939	1.42768	-13.4762
1310	-26.7307	2.1435	-15.1088	-25.5234	1.49472	-13.4948
1311	-26.8091	2.2222	-15.1422	-25.5529	1.5571	-13.5049
1312	-26.8871	2.30124	-15.1703	-25.5827	1.61452	-13.5081
1313	-26.9646	2.38047	-15.1937	-25.6131	1.66697	-13.5055
1314	-27.0418	2.45974	-15.2128	-25.6441	1.7147	-13.4983
1315	-27.1184	2.53892	-15.2279	-25.6756	1.75826	-13.4876
1316	-27.1946	2.61786	-15.2394	-25.7072	1.79842	-13.4741
1317	-27.2702	2.69642	-15.2475	-25.7386	1.83618	-13.4584
1318	-27.3453	2.77446	-15.2525	-25.7693	1.8727	-13.4411
1319	-27.4197	2.85181	-15.2544	-25.7986	1.90918	-13.4225
1320	-27.4934	2.92834	-15.2533	-25.8259	1.94687	-13.4026
1321	-27.5662	3.00388	-15.2493	-25.8505	1.98692	-13.3817
1322	-27.6378	3.07827	-15.2423	-25.8718	2.03037	-13.3599
1323	-27.7082	3.15132	-15.2323	-25.889	2.07804	-13.3375
1324	-27.777	3.22285	-15.219	-25.9016	2.13053	-13.3146
1325	-27.8438	3.29268	-15.2025	-25.9091	2.18817	-13.2915
1326	-27.9083	3.36059	-15.1825	-25.9111	2.25102	-13.2688
1327	-27.9701	3.42637	-15.1588	-25.9074	2.31888	-13.2467
1328	-28.0287	3.48983	-15.1313	-25.8981	2.39133	-13.2258
1329	-28.0837	3.55074	-15.0998	-25.8834	2.46773	-13.2065
1330	-28.1344	3.60888	-15.0641	-25.8639	2.5473	-13.189
1331	-28.1805	3.66406	-15.0241	-25.8402	2.62913	-13.1735
1332	-28.2215	3.71607	-14.9795	-25.8133	2.71223	-13.1602
1333	-28.2568	3.76471	-14.9304	-25.7843	2.79555	-13.1488
1334	-28.2861	3.80983	-14.8767	-25.7544	2.87802	-13.139
1335	-28.3089	3.85127	-14.8182	-25.7249	2.95853	-13.1303
1336	-28.3249	3.8889	-14.7551	-25.6971	3.03599	-13.1221
1337	-28.3338	3.92263	-14.6874	-25.6724	3.10931	-13.1135
1338	-28.3354	3.95237	-14.6152	-25.6517	3.17739	-13.1037
1339	-28.3295	3.97808	-14.5387	-25.636	3.23919	-13.0918
1340	-28.3161	3.99975	-14.4579	-25.6263	3.29371	-13.0771
1341	-28.2953	4.0174	-14.3733	-25.6228	3.34	-13.0588
1342	-28.2672	4.03106	-14.2851	-25.626	3.37722	-13.0362
1343	-28.2319	4.04081	-14.1936	-25.6357	3.40466	-13.0088
1344	-28.1896	4.04673	-14.0991	-25.6515	3.42175	-12.9764
1345	-28.1408	4.04892	-14.002	-25.6728	3.42808	-12.9388
1346	-28.0857	4.0475	-13.9029	-25.6985	3.42349	-12.8959
1347	-28.0249	4.04258	-13.802	-25.7272	3.408	-12.8479
1348	-27.9586	4.03429	-13.6998	-25.7575	3.38187	-12.7951
1349	-27.8874	4.02272	-13.5969	-25.7875	3.34558	-12.7378
1350	-27.8117	4.00796	-13.4935	-25.8155	3.29984	-12.6765
1351	-27.732	3.99009	-13.3902	-25.8398	3.24554	-12.6114
1352	-27.6487	3.96914	-13.2874	-25.8586	3.18373	-12.5429
1353	-27.5623	3.9451	-13.1855	-25.8708	3.11557	-12.4715
1354	-27.473	3.91796	-13.0848	-25.8751	3.04233	-12.3973
1355	-27.3813	3.88761	-12.9856	-25.8711	2.96526	-12.3205
1356	-27.2875	3.85394	-12.8883	-25.8586	2.88561	-12.2413
1357	-27.1917	3.81678	-12.793	-25.8377	2.80454	-12.1596
1358	-27.0942	3.77589	-12.6998	-25.8094	2.72307	-12.0757
1359	-26.9953	3.73102	-12.609	-25.7745	2.64207	-11.9895
1360	-26.8949	3.68184	-12.5205	-25.7344	2.56217	-11.9011
1361	-26.7933	3.62802	-12.4343	-25.6906	2.48377	-11.8107
1362	-26.6905	3.56915	-12.3504	-25.6445	2.40698	-11.7187
1363	-26.5865	3.50484	-12.2685	-25.5976	2.33162	-11.6254
1364	-26.4814	3.43463	-12.1885	-25.551	2.25721	-11.5311
1365	-26.3751	3.3581	-12.11	-25.5055	2.18298	-11.4365
1366	-26.2678	3.27478	-12.0329	-25.4616	2.10784	-11.3421
1367	-26.1594	3.18422	-11.9565	-25.4193	2.03047	-11.2485
1368	-26.05	3.08602	-11.8806	-25.3782	1.94931	-11.1562
1369	-25.9396	2.97974	-11.8046	-25.3374	1.86262	-11.0656
1370	-25.8282	2.86503	-11.7281	-25.2959	1.76855	-10.9769
1371	-25.7161	2.74155	-11.6504	-25.2523	1.6652	-10.8903
1372	-25.6033	2.60903	-11.5709	-25.205	1.55071	-10.8057
1373	-25.49	2.46725	-11.489	-25.1525	1.42333	-10.7226
1374	-25.3764	2.31604	-11.4042	-25.0933	1.28153	-10.6405
1375	-25.2627	2.15532	-11.3156	-25.026	1.12404	-10.5584
1376	-25.1492	1.98508	-11.2227	-24.9496	0.94994	-10.4753
1377	-25.0362	1.80539	-11.1247	-24.8634	0.75873	-10.3899
1378	-24.924	1.61639	-11.021	-24.767	0.550339	-10.3008
1379	-24.813	1.41831	-10.9108	-24.6606	0.325164	-10.2066
1380	-24.7037	1.21144	-10.7935	-24.5447	0.0840565	-10.1058
1381	-24.5963	0.996188	-10.6683	-24.4203	-0.171696	-9.99717
1382	-24.4913	0.772999	-10.5345	-24.289	-0.440422	-9.87966
1383	-24.3893	0.54241	-10.3915	-24.1526	-0.720121	-9.75244
1384	-24.2906	0.305021	-10.2385	-24.0132	-1.00854	-9.61504
1385	-24.1958	0.0614958	-10.0748	-23.8733	-1.30327	-9.46736
1386	-24.1053	-0.187444	-9.89972	-23.7355	-1.60179	-9.30968
1387	-24.0196	-0.441026	-9.71258	-23.6026	-1.90157	-9.14264
1388	-23.9392	-0.698434	-9.51269	-23.4773	-2.20017	-8.96719
1389	-23.8645	-0.958815	-9.29936	-23.3624	-2.49524	-8.78453
1390	-23.796	-1.22129	-9.07191	-23.2606	-2.78464	-8.59598
1391	-23.7342	-1.48494	-8.82967	-23.1742	-3.06641	-8.40291
1392	-23.6795	-1.74886	-8.57198	-23.1054	-3.33889	-8.20655
1393	-23.6324	-2.01211	-8.2982	-23.0562	-3.60067	-8.0079
1394	-23.5932	-2.27377	-8.0077	-23.028	-3.85065	-7.80755
1395	-23.5624	-2.53293	-7.69988	-23.0222	-4.08805	-7.60563
1396	-23.5403	-2.78866	-7.37417	-23.0393	-4.31241	-7.40163
1397	-23.5273	-3.0401	-7.03006	-23.08	-4.5236	-7.1944
1398	-23.5237	-3.28637	-6.66706	-23.1442	-4.72179	-6.98205
1399	-23.5297	-3.52668	-6.28478	-23.2315	-4.90748	-6.76204
1400	-23.5457	-3.76022	-5.88287	-23.3413	-5.08141	-6.53115
1401	-23.5718	-3.98627	-5.4611	-23.4724	-5.24453	-6.28566
1402	-23.6084	-4.20413	-5.01932	-23.6235	-5.39798	-6.0214
1403	-23.6554	-4.41318	-4.5575	-23.7928	-5.54293	-5.73402
1404	-23.7131	-4.61284	-4.07575	-23.9783	-5.68057	-5.41915
1405	-23.7815	-4.8026	-3.57432	-24.1778	-5.81198	-5.07262
1406	-23.8607	-4.982	-3.05362	-24.3887	-5.93802	-4.6907
1407	-23.9505	-5.15065	-2.51422	-24.6086	-6.05929	-4.27027
1408	-24.051	-5.30824	-1.95688	-24.8345	-6.17602	-3.80906
1409	-24.162	-5.4545	-1.38252	-25.0638	-6.28803	-3.3057
1410	-24.2834	-5.58924	-0.792275	-25.2938	-6.39469	-2.7598
1411	-24.4149	-5.71234	-0.187456	-25.5218	-6.49497	-2.17198
1412	-24.5561	-5.82372	0.430444	-25.7454	-6.58739	-1.54377
1413	-24.7069	-5.92339	1.05976	-25.9623	-6.67019	-0.877472
1414	-24.8667	-6.0114	1.69865	-26.1706	-6.74131	-0.176023
1415	-25.0351	-6.08786	2.34514	-26.3687	-6.79858	0.557231
1416	-25.2117	-6.15293	2.99713	-26.5554	-6.83979	1.31872
1417	-25.3958	-6.20682	3.6524	-26.7298	-6.86281	2.10486
1418	-25.5869	-6.24979	4.30869	-26.8914	-6.86574	2.91218
1419	-25.7843	-6.28212	4.96368	-27.0401	-6.84699	3.73746
1420	-25.9872	-6.30416	5.61502	-27.1762	-6.80539	4.57781
1421	-26.195	-6.31626	6.26043	-27.3002	-6.74026	5.43064
1422	-26.4068	-6.31879	6.89765	-27.413	-6.65146	6.29371
1423	-26.6218	-6.31217	7.52454	-27.5156	-6.53943	7.16502
1424	-26.8392	-6.29681	8.13909	-27.609	-6.40518	8.04276
1425	-27.058	-6.27313	8.73945	-27.6943	-6.25029	8.92519
1426	-27.2774	-6.24155	9.32394	-27.7728	-6.07684	9.81062
1427	-27.4964	-6.2025	9.89113	-27.8452	-5.88738	10.6973
1428	-27.7141	-6.15637	10.4398	-27.9124	-5.68479	11.5833
1429	-27.9295	-6.10358	10.969	-27.9749	-5.47222	12.4665
1430	-28.1416	-6.04449	11.4781	-28.0327	-5.25298	13.3448
1431	-28.3496	-5.97946	11.9666	-28.0858	-5.03037	14.2159
1432	-28.5525	-5.90882	12.4344	-28.1338	-4.80762	15.0772
1433	-28.7493	-5.83287	12.8817	-28.1761	-4.58776	15.9262
1434	-28.9392	-5.7519	13.3089	-28.2119	-4.37353	16.7603
1435	-29.1213	-5.66614	13.7165	-28.2402	-4.16728	17.577
1436	-29.2948	-5.57581	14.1057	-28.2602	-3.97097	18.3737
1437	-29.4589	-5.48112	14.4773	-28.2711	-3.78608	19.1482
1438	-29.6129	-5.38223	14.8329	-28.2723	-3.61362	19.8982
1439	-29.7561	-5.2793	15.1739	-28.2636	-3.45419	20.6218
1440	-29.8879	-5.17247	15.5019	-28.2449	-3.30793	21.3171
1441	-30.0078	-5.06189	15.8186	-28.2167	-3.17465	21.9827
1442	-30.1153	-4.94768	16.1261	-28.1798	-3.05389	22.6173
1443	-30.21	-4.83	16.4261	-28.1352	-2.94493	23.2198
1444	-30.2917	-4.709	16.7206	-28.0844	-2.84694	23.7896
1445	-30.36	-4.58484	17.0117	-28.029	-2.759	24.3261
1446	-30.4148	-4.45774	17.3012	-27.9709	-2.68017	24.8293
1447	-30.4561	-4.32791	17.5911	-27.9118	-2.60954	25.2993
1448	-30.484	-4.19561	17.8832	-27.8534	-2.54626	25.7365
1449	-30.4985	-4.06114	18.1792	-27.7974	-2.48955	26.1418
1450	-30.4998	-3.92482	18.4807	-27.7449	-2.43867	26.5162
1451	-30.4883	-3.787	18.7892	-27.6971	-2.39296	26.8609
1452	-30.4644	-3.64809	19.1059	-27.6544	-2.35175	27.1775
1453	-30.4285	-3.50849	19.4321	-27.6171	-2.31439	27.4676
1454	-30.3812	-3.36865	19.7684	-27.5851	-2.28021	27.7331
1455	-30.3231	-3.22902	20.1157	-27.558	-2.2485	27.9756
1456	-30.2549	-3.09006	20.4744	-27.5352	-2.21848	28.197
1457	-30.1775	-2.95221	20.8447	-27.5158	-2.18934	28.3988
1458	-30.0916	-2.81594	21.2265	-27.4992	-2.16023	28.5826
1459	-29.998	-2.68166	21.6196	-27.4843	-2.1303	28.7497
1460	-29.8979	-2.54976	22.0234	-27.4706	-2.09871	28.9011
1461	-29.7921	-2.42058	22.4372	-27.4574	-2.06465	29.0377
1462	-29.6815	-2.29443	22.8601	-27.4445	-2.02742	29.1602
1463	-29.5673	-2.17154	23.2908	-27.4315	-1.9864	29.2691
1464	-29.4505	-2.05208	23.728	-27.4186	-1.94111	29.3647
1465	-29.332	-1.93616	24.1702	-27.406	-1.8912	29.4474
1466	-29.2128	-1.82381	24.6158	-27.3938	-1.83645	29.5173
1467	-29.094	-1.71497	25.0628	-27.3826	-1.77678	29.5748
1468	-28.9766	-1.60952	25.5096	-27.3726	-1.71222	29.6202
1469	-28.8613	-1.50727	25.9541	-27.3641	-1.64287	29.654
1470	-28.7491	-1.40795	26.3945	-27.3573	-1.56892	29.6767
1471	-28.6408	-1.31122	26.8288	-27.3523	-1.49059	29.6891
1472	-28.5372	-1.21669	27.2551	-27.349	-1.40812	29.692
1473	-28.4389	-1.12394	27.6715	-27.3471	-1.32172	29.6863
1474	-28.3466	-1.03248	28.0764	-27.3465	-1.23159	29.6731
1475	-28.2607	-0.941824	28.468	-27.3466	-1.13788	29.6535
1476	-28.1817	-0.851451	28.8448	-27.3472	-1.04066	29.6286
1477	-28.1101	-0.760846	29.2053	-27.348	-0.939919	29.5994
1478	-28.046	-0.6695	29.5484	-27.3488	-0.835562	29.5667
1479	-27.9898	-0.576921	29.8728	-27.3495	-0.727372	29.5312
1480	-27.9415	-0.482649	30.1777	-27.3503	-0.615022	29.4934
1481	-27.9012	-0.386259	30.462	-27.3517	-0.49807	29.4533
1482	-27.8688	-0.287372	30.7252	-27.3542	-0.375967	29.4109
1483	-27.8443	-0.185656	30.9666	-27.3586	-0.248077	29.3657
1484	-27.8275	-0.0808354	31.1857	-27.3657	-0.113702	29.3171
1485	-27.8182	0.0273096	31.3822	-27.3767	0.0278762	29.2643
1486	-27.8159	0.138944	31.5558	-27.3923	0.177356	29.2065
1487	-27.8205	0.254176	31.7061	-27.4135	0.33536	29.1426
1488	-27.8314	0.373062	31.8329	-27.441	0.502383	29.0721
1489	-27.8481	0.49561	31.9359	-27.4752	0.678737	28.9943
1490	-27.8703	0.621783	32.015	-27.5163	0.864506	28.9093
1491	-27.8972	0.751506	32.0699	-27.5642	1.0595	28.817
1492	-27.9283	0.884669	32.1001	-27.6186	1.26322	28.7182
1493	-27.9631	1.02113	32.1053	-27.6788	1.47486	28.6138
1494	-28.0008	1.16074	32.0851	-27.744	1.69329	28.5049
1495	-28.041	1.3033	32.0388	-27.8129	1.91707	28.393
1496	-28.0829	1.44863	31.9657	-27.8844	2.14448	28.2793
1497	-28.1259	1.59651	31.8651	-27.9572	2.3736	28.1653
1498	-28.1695	1.74673	31.7361	-28.03	2.60232	28.0519
1499	-28.213	1.89905	31.5778	-28.1016	2.82845	27.9397
1500	-28.2561	2.05322	31.3891	-28.1709	3.04979	27.8288
1501	-28.2982	2.20898	31.169	-28.2372	3.2642	27.7187
1502	-28.339	2.36607	30.9162	-28.2997	3.46968	27.6085
1503	-28.3779	2.52416	30.6296	-28.3583	3.66446	27.4965
1504	-28.4148	2.68294	30.3081	-28.413	3.84705	27.3805
1505	-28.4495	2.84205	29.9505	-28.464	4.01629	27.258
1506	-28.4817	3.0011	29.5557	-28.512	4.17141	27.1261
1507	-28.5113	3.15964	29.1228	-28.5578	4.31198	26.9815
1508	-28.5383	3.31722	28.6509	-28.6026	4.43801	26.8209
1509	-28.5627	3.47329	28.1394	-28.6477	4.54984	26.6408
1510	-28.5845	3.62731	27.5875	-28.6942	4.64815	26.4376
1511	-28.6038	3.77865	26.9951	-28.7437	4.73391	26.2077
1512	-28.6206	3.92665	26.362	-28.7972	4.80829	25.9475
1513	-28.6351	4.07062	25.6884	-28.8558	4.8726	25.6536
1514	-28.6473	4.20981	24.9746	-28.9202	4.92819	25.3226
1515	-28.6574	4.34346	24.2214	-28.9905	4.97635	24.9514
1516	-28.6653	4.47077	23.4296	-29.0664	5.01823	24.5369
1517	-28.6711	4.59093	22.6006	-29.1472	5.05477	24.0766
1518	-28.6748	4.70311	21.7358	-29.2313	5.08657	23.5685
1519	-28.6762	4.80651	20.8371	-29.3167	5.11389	23.011
1520	-28.6754	4.90032	19.9066	-29.4005	5.13657	22.4033
1521	-28.672	4.98376	18.9466	-29.4797	5.15408	21.7451
1522	-28.6658	5.05608	17.9598	-29.5506	5.1655	21.0371
1523	-28.6566	5.11659	16.9491	-29.6094	5.1696	20.2806
1524	-28.6439	5.16464	15.9174	-29.6522	5.1649	19.4779
1525	-28.6274	5.19965	14.8681	-29.6754	5.1498	18.6316
1526	-28.6067	5.22112	13.8044	-29.6756	5.12268	17.745
1527	-28.5814	5.22863	12.7301	-29.65	5.08199	16.8218
1528	-28.5509	5.22184	11.6486	-29.5966	5.02644	15.8661
1529	-28.5149	5.20052	10.5638	-29.5142	4.95501	14.882
1530	-28.473	5.16453	9.47919	-29.4025	4.86708	13.8736
1531	-28.4247	5.11383	8.39864	-29.2624	4.76246	12.8451
1532	-28.3699	5.04849	7.32576	-29.0954	4.64141	11.8002
1533	-28.3082	4.9687	6.26417	-28.904	4.50463	10.7427
1534	-28.2395	4.87472	5.21733	-28.6914	4.35324	9.67624
1535	-28.1638	4.76695	4.18862	-28.4614	4.18869	8.60398
1536	-28.0811	4.64586	3.1812	-28.2179	4.01272	7.52909
1537	-27.9915	4.51204	2.19808	-27.9653	3.82727	6.45456
1538	-27.8953	4.36616	1.24206	-27.7076	3.63436	5.38322
1539	-27.7929	4.20896	0.315686	-27.4486	3.43608	4.31783
1540	-27.6846	4.04128	-0.578709	-27.1918	3.23446	3.26106
1541	-27.5711	3.86401	-1.43905	-26.9401	3.03144	2.21547
1542	-27.4531	3.6781	-2.26353	-26.6957	2.82883	1.18355
1543	-27.3312	3.48457	-3.05059	-26.4604	2.6283	0.167645
1544	-27.2063	3.28446	-3.79893	-26.2352	2.43138	-0.830034
1545	-27.0791	3.07886	-4.50751	-26.0206	2.23949	-1.80747
1546	-26.9507	2.86886	-5.17556	-25.8168	2.05397	-2.76287
1547	-26.8217	2.65559	-5.80254	-25.6234	1.87617	-3.69466
1548	-26.6933	2.44018	-6.38817	-25.44	1.7074	-4.60155
1549	-26.5661	2.22375	-6.93241	-25.266	1.54905	-5.4825
1550	-26.441	2.00743	-7.43544	-25.1009	1.40253	-6.3367
1551	-26.3188	1.79231	-7.89768	-24.944	1.26931	-7.16359
1552	-26.2002	1.57948	-8.31977	-24.795	1.15086	-7.96276
1553	-26.0857	1.36998	-8.70258	-24.6536	1.04864	-8.73395
1554	-25.9758	1.16484	-9.04718	-24.5199	0.963983	-9.47701
1555	-25.8709	0.96503	-9.35486	-24.3937	0.898076	-10.1918
1556	-25.7712	0.77148	-9.6271	-24.2755	0.851855	-10.8782
1557	-25.6768	0.585073	-9.86561	-24.1653	0.825942	-11.536
1558	-25.5878	0.406634	-10.0723	-24.0636	0.820572	-12.165
1559	-25.5039	0.236928	-10.2491	-23.9705	0.835542	-12.7648
1560	-25.4249	0.0766591	-10.3984	-23.8862	0.870175	-13.335
1561	-25.3504	-0.0735396	-10.5225	-23.8106	0.923304	-13.8749
1562	-25.2798	-0.213105	-10.6239	-23.7436	0.993282	-14.3839
1563	-25.2126	-0.341552	-10.7053	-23.6846	1.07802	-14.8613
1564	-25.1481	-0.45847	-10.7693	-23.633	1.17505	-15.3061
1565	-25.0856	-0.563537	-10.8188	-23.5878	1.28162	-15.7175
1566	-25.0243	-0.656512	-10.8565	-23.548	1.39477	-16.0946
1567	-24.9634	-0.737244	-10.8852	-23.5123	1.51148	-16.4368
1568	-24.9022	-0.805673	-10.9076	-23.4796	1.62877	-16.7431
1569	-24.8398	-0.861834	-10.9264	-23.4487	1.7438	-17.0132
1570	-24.7755	-0.905854	-10.9441	-23.4187	1.85398	-17.2466
1571	-24.7087	-0.937958	-10.9632	-23.3889	1.95706	-17.4432
1572	-24.6388	-0.958468	-10.9857	-23.3587	2.05112	-17.6032
1573	-24.5653	-0.967804	-11.0137	-23.328	2.13468	-17.7269
1574	-24.4879	-0.966479	-11.049	-23.2969	2.20662	-17.8151
1575	-24.4062	-0.955105	-11.093	-23.2659	2.26617	-17.8686
1576	-24.3201	-0.934383	-11.1468	-23.2356	2.3129	-17.8888
1577	-24.2297	-0.905103	-11.2114	-23.2068	2.34663	-17.877
1578	-24.1349	-0.868142	-11.2873	-23.1803	2.36739	-17.8349
1579	-24.0362	-0.824451	-11.3749	-23.1568	2.37536	-17.7644
1580	-23.9337	-0.775054	-11.4739	-23.1372	2.37083	-17.6673
1581	-23.828	-0.721038	-11.5842	-23.1218	2.35415	-17.5458
1582	-23.7197	-0.663544	-11.7051	-23.111	2.32574	-17.4018
1583	-23.6093	-0.603755	-11.8356	-23.1045	2.28606	-17.2373
1584	-23.4977	-0.542886	-11.9747	-23.1019	2.23562	-17.0544
1585	-23.3857	-0.482171	-12.121	-23.1026	2.17494	-16.855
1586	-23.274	-0.422853	-12.2729	-23.1056	2.10462	-16.6409
1587	-23.1636	-0.366166	-12.4288	-23.1094	2.02528	-16.4141
1588	-23.0555	-0.313322	-12.5869	-23.1127	1.93754	-16.1762
1589	-22.9504	-0.265501	-12.7454	-23.1138	1.84202	-15.9289
1590	-22.8492	-0.223832	-12.9022	-23.1112	1.73928	-15.674
1591	-22.7529	-0.189385	-13.0555	-23.1032	1.62977	-15.413
1592	-22.6621	-0.163151	-13.2034	-23.0884	1.51381	-15.1475
1593	-22.5777	-0.146038	-13.3441	-23.0656	1.39154	-14.8789
1594	-22.5002	-0.138853	-13.4757	-23.0339	1.26288	-14.6085
1595	-22.4303	-0.142297	-13.5968	-22.9925	1.12756	-14.3376
1596	-22.3683	-0.156952	-13.7056	-22.9411	0.985073	-14.0669
1597	-22.3147	-0.183278	-13.801	-22.8799	0.834768	-13.7971
1598	-22.2696	-0.221605	-13.8816	-22.8091	0.675851	-13.5284
1599	-22.2333	-0.272129	-13.9465	-22.7296	0.507468	-13.2607
1600	-22.2056	-0.33491	-13.9949	-22.6424	0.328783	-12.9935
1601	-22.1864	-0.409871	-14.026	-22.5489	0.139054	-12.7258
1602	-22.1756	-0.496802	-14.0394	-22.4505	-0.0622747	-12.4563
1603	-22.1727	-0.595356	-14.0347	-22.3492	-0.275496	-12.1833
1604	-22.1774	-0.70506	-14.0118	-22.247	-0.500574	-11.9052
1605	-22.189	-0.825315	-13.9707	-22.146	-0.737094	-11.6201
1606	-22.2069	-0.955408	-13.9114	-22.0486	-0.984238	-11.3263
1607	-22.2306	-1.09451	-13.8341	-21.9573	-1.24079	-11.0223
1608	-22.2593	-1.24171	-13.7391	-21.8747	-1.50516	-10.707
1609	-22.2922	-1.39599	-13.6268	-21.8037	-1.77546	-10.3799
1610	-22.3287	-1.55626	-13.4974	-21.7468	-2.04957	-10.0412
1611	-22.3681	-1.72136	-13.3513	-21.707	-2.32523	-9.69132
1612	-22.4096	-1.89007	-13.1888	-21.6869	-2.60017	-9.33169
1613	-22.4528	-2.06115	-13.0101	-21.689	-2.87219	-8.96398
1614	-22.4971	-2.2333	-12.8155	-21.7158	-3.13927	-8.59024
1615	-22.542	-2.40523	-12.605	-21.7692	-3.39962	-8.21263
1616	-22.5874	-2.57564	-12.3786	-21.8509	-3.65176	-7.83316
1617	-22.6329	-2.74322	-12.1361	-21.9623	-3.89454	-7.4535
1618	-22.6786	-2.90671	-11.8772	-22.1039	-4.12711	-7.07466
1619	-22.7245	-3.06488	-11.6013	-22.2761	-4.34896	-6.69681
1620	-22.7708	-3.21654	-11.3079	-22.4783	-4.55979	-6.31915
1621	-22.8178	-3.36057	-10.9962	-22.7095	-4.75951	-5.93979
1622	-22.8661	-3.49592	-10.6651	-22.9679	-4.94814	-5.55575
1623	-22.9161	-3.62164	-10.3137	-23.2511	-5.12571	-5.16311
1624	-22.9686	-3.73684	-9.94073	-23.5559	-5.29216	-4.75714
1625	-23.0243	-3.84077	-9.54483	-23.8786	-5.44731	-4.33258
1626	-23.0839	-3.93278	-9.12465	-24.2149	-5.5907	-3.88398
1627	-23.1483	-4.01233	-8.67873	-24.5603	-5.72163	-3.40605
1628	-23.2183	-4.07901	-8.20563	-24.9096	-5.83904	-2.89401
1629	-23.2948	-4.13256	-7.70391	-25.2577	-5.94153	-2.34392
1630	-23.3786	-4.17281	-7.17217	-25.5995	-6.02742	-1.75299
1631	-23.4703	-4.19977	-6.6091	-25.9299	-6.09472	-1.11973
1632	-23.5707	-4.21353	-6.01354	-26.2445	-6.14127	-0.444094
1633	-23.6802	-4.21434	-5.38446	-26.539	-6.16485	0.272556
1634	-23.7994	-4.20256	-4.72105	-26.8101	-6.16324	1.02752
1635	-23.9284	-4.17867	-4.02272	-27.055	-6.13445	1.81693
1636	-24.0675	-4.14325	-3.28913	-27.272	-6.07677	2.63606
1637	-24.2165	-4.09698	-2.52024	-27.4601	-5.98897	3.47953
1638	-24.3753	-4.04062	-1.71631	-27.6192	-5.87036	4.34167
1639	-24.5434	-3.975	-0.877908	-27.7499	-5.72092	5.21677
1640	-24.7204	-3.90101	-0.00595657	-27.8537	-5.5413	6.09938
1641	-24.9055	-3.81959	0.898302	-27.9325	-5.3329	6.98447
1642	-25.0978	-3.7317	1.83328	-27.9887	-5.09779	7.86762
1643	-25.2964	-3.63833	2.79708	-28.0249	-4.83868	8.7451
1644	-25.5	-3.54045	3.78748	-28.0439	-4.55885	9.6139
1645	-25.7075	-3.43904	4.80195	-28.0483	-4.26202	10.4717
1646	-25.9174	-3.33503	5.83771	-28.0404	-3.95225	11.3169
1647	-26.1283	-3.22935	6.89174	-28.0223	-3.63377	12.1484
1648	-26.3387	-3.12286	7.9608	-27.9956	-3.31088	12.9655
1649	-26.5471	-3.01637	9.04149	-27.9616	-2.98782	13.768
1650	-26.7521	-2.91063	10.1303	-27.921	-2.66861	14.556
1651	-26.9521	-2.80634	11.2235	-27.8743	-2.35699	15.3295
1652	-27.1456	-2.70409	12.3175	-27.8217	-2.05633	16.089
1653	-27.3314	-2.60442	13.4086	-27.7634	-1.76953	16.8346
1654	-27.508	-2.50781	14.4931	-27.6994	-1.49904	17.5666
1655	-27.6744	-2.41462	15.5674	-27.6298	-1.2468	18.2851
1656	-27.8293	-2.32517	16.628	-27.5552	-1.01425	18.9902
1657	-27.972	-2.23968	17.6716	-27.476	-0.802373	19.6817
1658	-28.1015	-2.15829	18.6949	-27.3933	-0.611711	20.3591
1659	-28.2173	-2.08109	19.695	-27.3083	-0.442406	21.022
1660	-28.3189	-2.00807	20.669	-27.2224	-0.29425	21.6697
1661	-28.4059	-1.93916	21.6143	-27.1372	-0.166728	22.3012
1662	-28.4783	-1.87423	22.5287	-27.0546	-0.0590518	22.9155
1663	-28.5361	-1.81308	23.4099	-26.976	0.0298031	23.5115
1664	-28.5793	-1.75544	24.2562	-26.9031	0.101078	24.0879
1665	-28.6085	-1.701	25.0658	-26.8371	0.156208	24.6434
1666	-28.624	-1.64938	25.8376	-26.7792	0.196813	25.1768
1667	-28.6266	-1.60014	26.5702	-26.7299	0.22468	25.6867
1668	-28.6169	-1.55283	27.2628	-26.6897	0.241746	26.1719
1669	-28.5959	-1.50693	27.9147	-26.6585	0.250081	26.6311
1670	-28.5645	-1.46189	28.5254	-26.636	0.251853	27.0633
1671	-28.5239	-1.41713	29.0946	-26.6217	0.249292	27.4674
1672	-28.4751	-1.37204	29.6221	-26.6147	0.244633	27.8425
1673	-28.4195	-1.32599	30.1081	-26.6141	0.24006	28.188
1674	-28.3583	-1.27835	30.5527	-26.6189	0.237642	28.5033
1675	-28.2928	-1.22847	30.9564	-26.628	0.239265	28.7882
1676	-28.2243	-1.1757	31.3195	-26.6406	0.246572	29.0427
1677	-28.1541	-1.1194	31.6427	-26.6556	0.260915	29.2668
1678	-28.0836	-1.05895	31.9268	-26.6723	0.283325	29.461
1679	-28.0141	-0.99375	32.1726	-26.6902	0.314492	29.6261
1680	-27.9468	-0.923234	32.3812	-26.7088	0.354782	29.7629
1681	-27.8829	-0.846876	32.5535	-26.7278	0.404258	29.8724
1682	-27.8237	-0.764201	32.6909	-26.7469	0.462728	29.9559
1683	-27.77	-0.674792	32.7947	-26.7663	0.529802	30.0147
1684	-27.7231	-0.578301	32.8662	-26.7859	0.60496	30.0501
1685	-27.6836	-0.474453	32.907	-26.8059	0.687619	30.0635
1686	-27.6525	-0.363057	32.9187	-26.8265	0.777201	30.0562
1687	-27.6304	-0.244014	32.903	-26.8478	0.873193	30.0295
1688	-27.6179	-0.117317	32.8618	-26.87	0.975193	29.9846
1689	-27.6154	0.0169391	32.7968	-26.8933	1.08295	29.9226
1690	-27.6233	0.158556	32.7102	-26.9178	1.19636	29.8445
1691	-27.6418	0.307231	32.6038	-26.9438	1.31552	29.7511
1692	-27.6711	0.462557	32.4797	-26.9713	1.44064	29.6433
1693	-27.7109	0.624026	32.34	-27.0007	1.57208	29.5217
1694	-27.7613	0.79103	32.1867	-27.0321	1.71023	29.387
1695	-27.822	0.962872	32.0219	-27.0659	1.8555	29.2398
1696	-27.8926	1.13877	31.8475	-27.1024	2.00825	29.0807
1697	-27.9726	1.31786	31.6655	-27.142	2.16868	28.9104
1698	-28.0614	1.49923	31.4777	-27.1854	2.33677	28.7296
1699	-28.1584	1.68191	31.2857	-27.2329	2.51228	28.5391
1700	-28.2629	1.86489	31.0911	-27.285	2.69463	28.3397
1701	-28.374	2.04714	30.8952	-27.3422	2.88294	28.1323
1702	-28.4909	2.22761	30.699	-27.4049	3.07602	27.9178
1703	-28.6127	2.4053	30.5035	-27.473	3.27238	27.6971
1704	-28.7383	2.57917	30.3092	-27.5466	3.47033	27.4711
1705	-28.8669	2.74827	30.1165	-27.6255	3.668	27.2407
1706	-28.9972	2.91167	29.9255	-27.7092	3.86346	27.0065
1707	-29.1284	3.06851	29.7358	-27.7969	4.05477	26.7691
1708	-29.2594	3.218	29.5469	-27.8879	4.24011	26.5291
1709	-29.389	3.35945	29.3578	-27.9811	4.4178	26.2867
1710	-29.5163	3.49222	29.1675	-28.0755	4.58639	26.042
1711	-29.6403	3.61581	28.9744	-28.17	4.7447	25.7949
1712	-29.7598	3.72977	28.7768	-28.2636	4.89184	25.5452
1713	-29.874	3.83378	28.5727	-28.3557	5.02722	25.2924
1714	-29.9817	3.9276	28.3598	-28.4454	5.15057	25.0358
1715	-30.0822	4.01109	28.1357	-28.5326	5.26187	24.7743
1716	-30.1744	4.08418	27.898	-28.6171	5.36139	24.5069
1717	-30.2576	4.14688	27.6438	-28.6992	5.44961	24.232
1718	-30.3308	4.19928	27.3705	-28.7792	5.52724	23.9477
1719	-30.3934	4.24152	27.0752	-28.858	5.59513	23.652
1720	-30.4446	4.27379	26.7553	-28.9362	5.6543	23.3424
1721	-30.4838	4.29629	26.408	-29.0146	5.70583	23.0159
1722	-30.5104	4.30928	26.0308	-29.0938	5.75086	22.6696
1723	-30.5238	4.313	25.6214	-29.1742	5.79048	22.3001
1724	-30.5238	4.3077	25.1775	-29.2558	5.82569	21.9038
1725	-30.5099	4.29364	24.6974	-29.3381	5.85729	21.4771
1726	-30.4819	4.27102	24.1792	-29.42	5.8858	21.0167
1727	-30.4397	4.24006	23.6218	-29.4999	5.91133	20.5194
1728	-30.3834	4.20092	23.0243	-29.5754	5.93357	19.9823
1729	-30.3129	4.15373	22.3861	-29.6437	5.95164	19.4032
1730	-30.2287	4.0986	21.7071	-29.7015	5.96414	18.7808
1731	-30.1309	4.03562	20.9875	-29.7452	5.96911	18.1144
1732	-30.0202	3.96482	20.2279	-29.771	5.96411	17.4043
1733	-29.8972	3.88624	19.4296	-29.7753	5.94632	16.6515
1734	-29.7627	3.79991	18.5939	-29.7548	5.9127	15.8582
1735	-29.6175	3.70585	17.7227	-29.7068	5.86012	15.0269
1736	-29.4627	3.60409	16.8182	-29.629	5.78563	14.1612
1737	-29.2995	3.4947	15.883	-29.5203	5.68657	13.2647
1738	-29.129	3.37777	14.9199	-29.3806	5.5608	12.3415
1739	-28.9526	3.25344	13.9319	-29.2106	5.40681	11.3958
1740	-28.7718	3.12194	12.9225	-29.0121	5.22386	10.4316
1741	-28.5879	2.98354	11.895	-28.7876	5.012	9.45278
1742	-28.4024	2.83861	10.8532	-28.5406	4.77212	8.46284
1743	-28.217	2.6876	9.80066	-28.275	4.50591	7.46501
1744	-28.0331	2.53105	8.74127	-27.9948	4.21577	6.4621
1745	-27.8522	2.36962	7.67877	-27.7045	3.90472	5.45659
1746	-27.6758	2.20402	6.61693	-27.4083	3.5763	4.45066
1747	-27.5052	2.0351	5.55944	-27.1098	3.2344	3.44627
1748	-27.3417	1.86375	4.50989	-26.8127	2.88316	2.44524
1749	-27.1866	1.69097	3.47175	-26.5199	2.52682	1.44935
1750	-27.041	1.5178	2.44833	-26.2336	2.16959	0.460408
1751	-26.9057	1.34534	1.44275	-25.9558	1.81558	-0.519689
1752	-26.7815	1.17471	0.457957	-25.6879	1.4687	-1.48893
1753	-26.6692	1.00706	-0.503358	-25.4307	1.13262	-2.44517
1754	-26.5691	0.843551	-1.43872	-25.185	0.810696	-3.38618
1755	-26.4815	0.685296	-2.34591	-24.9512	0.50597	-4.30966
1756	-26.4065	0.533391	-3.22297	-24.7298	0.221145	-5.21333
1757	-26.344	0.388872	-4.06822	-24.521	-0.0414249	-6.09499
1758	-26.2938	0.2527	-4.88024	-24.3252	-0.279737	-6.95255
1759	-26.2554	0.125749	-5.65792	-24.1429	-0.492145	-7.78413
1760	-26.228	0.00878901	-6.40041	-23.9745	-0.677359	-8.58805
1761	-26.211	-0.0975281	-7.10715	-23.8205	-0.834457	-9.36284
1762	-26.2032	-0.19268	-7.77784	-23.6813	-0.962887	-10.1072
1763	-26.2036	-0.276283	-8.41246	-23.5574	-1.06248	-10.8201
1764	-26.2109	-0.3481	-9.01125	-23.449	-1.13346	-11.5006
1765	-26.2237	-0.408044	-9.57468	-23.356	-1.17645	-12.1476
1766	-26.2404	-0.456184	-10.1034	-23.2784	-1.1925	-12.7603
1767	-26.2596	-0.492741	-10.5984	-23.2156	-1.18305	-13.3377
1768	-26.2796	-0.518087	-11.0606	-23.1668	-1.14996	-13.879
1769	-26.2988	-0.532743	-11.4914	-23.1308	-1.09544	-14.3829
1770	-26.3155	-0.537369	-11.8919	-23.1063	-1.02203	-14.8486
1771	-26.3282	-0.532754	-12.2637	-23.0917	-0.93257	-15.2749
1772	-26.3353	-0.519806	-12.6082	-23.0852	-0.830058	-15.6609
1773	-26.3354	-0.49954	-12.9269	-23.0851	-0.71762	-16.0056
1774	-26.3273	-0.473061	-13.2213	-23.0896	-0.598395	-16.3085
1775	-26.3096	-0.441551	-13.4928	-23.0971	-0.475454	-16.5691
1776	-26.2815	-0.406248	-13.743	-23.1063	-0.351716	-16.7873
1777	-26.2422	-0.368433	-13.973	-23.1161	-0.229883	-16.9634
1778	-26.191	-0.329411	-14.1842	-23.1258	-0.112396	-17.098
1779	-26.1276	-0.290494	-14.3775	-23.1351	-0.00140972	-17.1922
1780	-26.0519	-0.252982	-14.5541	-23.1441	0.101207	-17.2473
1781	-25.964	-0.218153	-14.7148	-23.1529	0.193855	-17.2652
1782	-25.8642	-0.187241	-14.8601	-23.1622	0.275179	-17.2478
1783	-25.753	-0.161425	-14.9908	-23.1726	0.344026	-17.1974
1784	-25.6313	-0.14182	-15.1071	-23.1848	0.399418	-17.1164
1785	-25.5	-0.129458	-15.2094	-23.1994	0.440522	-17.0074
1786	-25.3603	-0.125288	-15.2978	-23.217	0.466639	-16.8727
1787	-25.2135	-0.130162	-15.3722	-23.2378	0.477207	-16.7148
1788	-25.0612	-0.144831	-15.4327	-23.2618	0.471812	-16.536
1789	-24.9049	-0.169939	-15.479	-23.2886	0.450209	-16.3384
1790	-24.7463	-0.206021	-15.5109	-23.3177	0.412355	-16.124
1791	-24.5873	-0.253501	-15.5281	-23.3479	0.358424	-15.8949
1792	-24.4295	-0.312691	-15.5302	-23.3781	0.288821	-15.6528
1793	-24.2747	-0.383793	-15.517	-23.4066	0.204173	-15.3999
1794	-24.1249	-0.466896	-15.4879	-23.4318	0.105309	-15.138
1795	-23.9816	-0.561985	-15.4428	-23.452	-0.00679201	-14.8694
1796	-23.8465	-0.668938	-15.3814	-23.4652	-0.131061	-14.5964
1797	-23.7212	-0.787535	-15.3032	-23.4697	-0.266415	-14.3216
1798	-23.6072	-0.917456	-15.2082	-23.4639	-0.411834	-14.0478
1799	-23.5057	-1.05829	-15.0963	-23.4464	-0.566435	-13.7775
1800	-23.4178	-1.20955	-14.9672	-23.4163	-0.729534	-13.5136
1801	-23.3447	-1.37066	-14.8212	-23.3729	-0.900684	-13.2584
1802	-23.2871	-1.54096	-14.6581	-23.316	-1.07969	-13.0142
1803	-23.2456	-1.71974	-14.4782	-23.246	-1.26658	-12.7825
1804	-23.2206	-1.90622	-14.2816	-23.1639	-1.46159	-12.5643
1805	-23.2126	-2.09956	-14.0685	-23.071	-1.66506	-12.3597
1806	-23.2215	-2.29888	-13.8394	-22.9695	-1.87738	-12.1681
1807	-23.2472	-2.50326	-13.5945	-22.8617	-2.09885	-11.9879
1808	-23.2895	-2.71175	-13.334	-22.7506	-2.32964	-11.8169
1809	-23.348	-2.92334	-13.0584	-22.6395	-2.56964	-11.6521
1810	-23.422	-3.13706	-12.768	-22.5318	-2.81844	-11.4902
1811	-23.511	-3.35188	-12.4631	-22.4311	-3.07525	-11.3274
1812	-23.614	-3.56679	-12.1438	-22.341	-3.3389	-11.1602
1813	-23.7302	-3.78079	-11.8103	-22.2648	-3.60786	-10.9852
1814	-23.8585	-3.99287	-11.4628	-22.2058	-3.88025	-10.7994
1815	-23.9979	-4.20206	-11.1013	-22.1668	-4.15394	-10.6005
1816	-24.1472	-4.40743	-10.7258	-22.1504	-4.42661	-10.387
1817	-24.3053	-4.60805	-10.336	-22.1587	-4.69586	-10.1583
1818	-24.4711	-4.80306	-9.93167	-22.1933	-4.95932	-9.91435
1819	-24.6434	-4.99164	-9.51256	-22.2556	-5.21474	-9.65609
1820	-24.8212	-5.17304	-9.07823	-22.3464	-5.46008	-9.38482
1821	-25.0032	-5.34655	-8.62818	-22.4662	-5.69356	-9.10222
1822	-25.1885	-5.51155	-8.16187	-22.6152	-5.91377	-8.81004
1823	-25.3762	-5.66748	-7.67872	-22.7932	-6.11963	-8.50982
1824	-25.5652	-5.81385	-7.17812	-22.9997	-6.31041	-8.20266
1825	-25.7549	-5.95027	-6.65946	-23.2338	-6.48572	-7.88902
1826	-25.9443	-6.07643	-6.12216	-23.4943	-6.64548	-7.5685
1827	-26.1328	-6.1921	-5.56568	-23.7796	-6.78981	-7.23979
1828	-26.3199	-6.29713	-4.98955	-24.0877	-6.91899	-6.90063
1829	-26.5048	-6.39149	-4.39339	-24.4161	-7.03338	-6.54782
1830	-26.6872	-6.47522	-3.77694	-24.762	-7.13329	-6.17741
1831	-26.8665	-6.54844	-3.14007	-25.122	-7.21894	-5.78482
1832	-27.0424	-6.61138	-2.48282	-25.4923	-7.29033	-5.36514
1833	-27.2144	-6.66435	-1.80537	-25.8687	-7.34722	-4.91336
1834	-27.3822	-6.70772	-1.1081	-26.2468	-7.38904	-4.42465
1835	-27.5453	-6.74198	-0.391555	-26.6217	-7.41487	-3.89463
1836	-27.7035	-6.76763	0.343523	-26.9884	-7.42344	-3.31964
1837	-27.8563	-6.7853	1.09621	-27.3422	-7.41318	-2.69689
1838	-28.0033	-6.79562	1.86541	-27.6781	-7.38224	-2.02463
1839	-28.1442	-6.7993	2.64986	-27.9917	-7.32864	-1.30219
1840	-28.2784	-6.79707	3.44816	-28.2791	-7.25032	-0.530058
1841	-28.4055	-6.7897	4.25876	-28.5369	-7.14534	0.290214
1842	-28.5251	-6.77797	5.08002	-28.7626	-7.01199	1.15607
1843	-28.6366	-6.76265	5.91022	-28.9544	-6.84896	2.06407
1844	-28.7396	-6.74451	6.74758	-29.1117	-6.65546	3.01003
1845	-28.8335	-6.72429	7.59028	-29.2346	-6.43137	3.98918
1846	-28.9179	-6.70269	8.4365	-29.3246	-6.1773	4.99631
1847	-28.9924	-6.68038	9.28446	-29.3835	-5.89462	6.02594
1848	-29.0565	-6.65792	10.1324	-29.4145	-5.58555	7.07239
1849	-29.11	-6.63584	10.9786	-29.4208	-5.25304	8.13
1850	-29.1524	-6.61454	11.8215	-29.4065	-4.90072	9.19316
1851	-29.1835	-6.59434	12.6595	-29.3757	-4.53283	10.2564
1852	-29.2033	-6.57544	13.4913	-29.3327	-4.15402	11.3147
1853	-29.2116	-6.55793	14.3154	-29.2814	-3.76922	12.363
1854	-29.2084	-6.54175	15.1307	-29.2256	-3.38343	13.3971
1855	-29.194	-6.52675	15.9361	-29.1685	-3.00158	14.4129
1856	-29.1685	-6.51261	16.7305	-29.1129	-2.62833	15.407
1857	-29.1323	-6.4989	17.513	-29.0609	-2.26793	16.3766
1858	-29.0858	-6.48506	18.2828	-29.014	-1.92407	17.3193
1859	-29.0294	-6.47043	19.039	-28.973	-1.59984	18.2335
1860	-28.9639	-6.45421	19.7809	-28.9383	-1.29763	19.118
1861	-28.89	-6.43554	20.5079	-28.9097	-1.0191	19.9723
1862	-28.8083	-6.41345	21.2192	-28.8867	-0.765256	20.7962
1863	-28.7197	-6.38692	21.9143	-28.8683	-0.536416	21.5901
1864	-28.6253	-6.35488	22.5925	-28.8535	-0.332315	22.3544
1865	-28.5258	-6.31623	23.2531	-28.8409	-0.152165	23.0901
1866	-28.4222	-6.26988	23.8957	-28.8291	0.00526049	23.7978
1867	-28.3157	-6.21472	24.5194	-28.8168	0.141538	24.4784
1868	-28.2072	-6.1497	25.1239	-28.8027	0.258515	25.1325
1869	-28.0978	-6.07381	25.7083	-28.7857	0.358227	25.7603
1870	-27.9885	-5.98611	26.2722	-28.7648	0.44283	26.3619
1871	-27.8804	-5.88573	26.8148	-28.7393	0.514536	26.9368
1872	-27.7743	-5.77193	27.3357	-28.7089	0.575556	27.4843
1873	-27.6714	-5.64406	27.8342	-28.6736	0.628059	28.0033
1874	-27.5726	-5.50159	28.3097	-28.6335	0.674125	28.4922
1875	-27.4786	-5.34414	28.7618	-28.5893	0.71572	28.9495
1876	-27.3905	-5.17146	29.19	-28.5417	0.754665	29.3733
1877	-27.3089	-4.98345	29.5938	-28.4919	0.79262	29.762
1878	-27.2347	-4.78014	29.9731	-28.441	0.831061	30.1138
1879	-27.1684	-4.56172	30.3273	-28.3904	0.871274	30.4274
1880	-27.1106	-4.32852	30.6565	-28.3413	0.91434	30.7017
1881	-27.062	-4.08101	30.9605	-28.2952	0.961131	30.9363
1882	-27.0229	-3.81979	31.2393	-28.2532	1.01231	31.1309
1883	-26.9937	-3.54558	31.4931	-28.2165	1.06832	31.286
1884	-26.9749	-3.25925	31.7221	-28.1861	1.12942	31.4025
1885	-26.9666	-2.96173	31.9267	-28.1629	1.19567	31.4818
1886	-26.969	-2.65408	32.1072	-28.1477	1.26699	31.5258
1887	-26.9823	-2.33743	32.2644	-28.141	1.34316	31.5365
1888	-27.0065	-2.01298	32.3989	-28.1433	1.42388	31.5166
1889	-27.0416	-1.682	32.5115	-28.1549	1.5088	31.4688
1890	-27.0876	-1.34579	32.603	-28.1759	1.59758	31.3958
1891	-27.1444	-1.00567	32.6743	-28.2063	1.68995	31.3007
1892	-27.2118	-0.663014	32.7266	-28.2459	1.78573	31.1865
1893	-27.2895	-0.319154	32.7607	-28.2946	1.88486	31.0561
1894	-27.3773	0.0245637	32.7778	-28.3519	1.98749	30.9126
1895	-27.4748	0.366825	32.7789	-28.4175	2.09394	30.7589
1896	-27.5817	0.706352	32.7649	-28.4908	2.20473	30.598
1897	-27.6976	1.04191	32.7369	-28.5714	2.32056	30.4327
1898	-27.822	1.37234	32.6957	-28.659	2.44231	30.2658
1899	-27.9544	1.69653	32.6421	-28.7531	2.57094	30.0999
1900	-28.0942	2.01345	32.5766	-28.8534	2.70746	29.9374
1901	-28.2408	2.32217	32.5	-28.9599	2.85287	29.7805
1902	-28.3937	2.62183	32.4123	-29.0723	3.00798	29.6309
1903	-28.5521	2.9117	32.3139	-29.1907	3.17341	29.4899
1904	-28.7152	3.19111	32.2046	-29.3149	3.34942	29.3584
1905	-28.8825	3.45953	32.0842	-29.4448	3.53583	29.2365
1906	-29.053	3.71649	31.9522	-29.5802	3.73199	29.1241
1907	-29.2259	3.96167	31.8079	-29.7208	3.93667	29.02
1908	-29.4005	4.19482	31.6504	-29.8659	4.14811	28.9229
1909	-29.5759	4.41579	31.4787	-30.0149	4.36399	28.8309
1910	-29.7511	4.62451	31.2914	-30.1666	4.58156	28.7416
1911	-29.9254	4.821	31.0871	-30.3201	4.79768	28.6528
1912	-30.0978	5.00535	30.8641	-30.474	5.00902	28.5619
1913	-30.2674	5.17769	30.6208	-30.6269	5.21218	28.4666
1914	-30.4333	5.33821	30.3553	-30.7776	5.40387	28.3647
1915	-30.5947	5.48713	30.0658	-30.9249	5.58107	28.2545
1916	-30.7507	5.62468	29.7504	-31.068	5.74121	28.1345
1917	-30.9006	5.75108	29.4072	-31.2062	5.88225	28.0035
1918	-31.0434	5.86657	29.0345	-31.3394	6.00281	27.8607
1919	-31.1785	5.97132	28.6307	-31.4678	6.10221	27.7055
1920	-31.3051	6.06548	28.1942	-31.592	6.18046	27.5372
1921	-31.4226	6.14915	27.7237	-31.7131	6.23824	27.3552
1922	-31.5302	6.22235	27.2181	-31.8325	6.27687	27.1585
1923	-31.6275	6.28502	26.6767	-31.9514	6.29816	26.9456
1924	-31.714	6.33705	26.099	-32.0715	6.30433	26.7145
1925	-31.789	6.37821	25.4847	-32.1939	6.29785	26.4626
1926	-31.8523	6.4082	24.8342	-32.3197	6.28129	26.1867
1927	-31.9034	6.42663	24.1479	-32.4491	6.25714	25.8828
1928	-31.942	6.43303	23.4269	-32.5822	6.22768	25.5468
1929	-31.9679	6.42685	22.6724	-32.7177	6.19478	25.1741
1930	-31.9807	6.4075	21.8862	-32.8541	6.15981	24.76
1931	-31.9804	6.37431	21.0705	-32.9887	6.12346	24.3003
1932	-31.9669	6.32661	20.2275	-33.1181	6.08572	23.791
1933	-31.94	6.26368	19.3601	-33.2383	6.0458	23.229
1934	-31.8999	6.18484	18.4715	-33.3448	6.00216	22.612
1935	-31.8464	6.08941	17.5648	-33.4326	5.95259	21.9389
1936	-31.7798	5.97678	16.6437	-33.497	5.89432	21.2094
1937	-31.7003	5.84639	15.7118	-33.5329	5.82416	20.4245
1938	-31.608	5.69779	14.773	-33.5361	5.73878	19.5859
1939	-31.5033	5.53064	13.8312	-33.5027	5.63485	18.6963
1940	-31.3866	5.34475	12.8903	-33.4298	5.50933	17.7587
1941	-31.2584	5.14006	11.9539	-33.3153	5.35966	16.7767
1942	-31.1191	4.9167	11.026	-33.1583	5.18395	15.7537
1943	-30.9695	4.67498	10.1098	-32.9591	4.98111	14.6934
1944	-30.8103	4.41541	9.20888	-32.719	4.75093	13.5991
1945	-30.6422	4.13868	8.32608	-32.4405	4.49411	12.4741
1946	-30.4662	3.8457	7.46415	-32.1271	4.21222	11.3215
1947	-30.2831	3.53758	6.62541	-31.783	3.9076	10.1443
1948	-30.0942	3.21562	5.81178	-31.4132	3.58326	8.9456
1949	-29.9004	2.8813	5.02481	-31.0229	3.24271	7.72858
1950	-29.7028	2.53629	4.26557	-30.6178	2.88982	6.49679
1951	-29.5028	2.1824	3.53471	-30.2035	2.52862	5.25411
1952	-29.3016	1.82159	2.83246	-29.7853	2.16319	4.00488
1953	-29.1003	1.45591	2.1586	-29.3685	1.79752	2.75386
1954	-28.9002	1.08752	1.51252	-28.9577	1.43543	1.50621
1955	-28.7025	0.718625	0.893232	-28.5569	1.08049	0.267399
1956	-28.5084	0.351459	0.299387	-28.1698	0.735981	-0.956976
1957	-28.3191	-0.0117379	-0.270654	-27.7992	0.404896	-2.16131
1958	-28.1356	-0.368762	-0.818794	-27.4474	0.089914	-3.3402
1959	-27.9587	-0.71747	-1.34714	-27.1162	-0.206583	-4.48859
1960	-27.7895	-1.05581	-1.85796	-26.8067	-0.482515	-5.60193
1961	-27.6285	-1.38185	-2.35361	-26.5196	-0.736106	-6.67629
1962	-27.4764	-1.69381	-2.83648	-26.2552	-0.965895	-7.70842
1963	-27.3336	-1.99006	-3.30898	-26.0132	-1.17075	-8.69578
1964	-27.2004	-2.26919	-3.77339	-25.7933	-1.3499	-9.63649
1965	-27.0769	-2.52998	-4.23193	-25.5947	-1.50296	-10.5293
1966	-26.9632	-2.77143	-4.68659	-25.4165	-1.62994	-11.3735
1967	-26.859	-2.99279	-5.13918	-25.2575	-1.73127	-12.1687
1968	-26.764	-3.19354	-5.59125	-25.1164	-1.80782	-12.9148
1969	-26.6777	-3.37341	-6.04404	-24.9917	-1.86086	-13.6119
1970	-26.5997	-3.53236	-6.49852	-24.8821	-1.8921	-14.2601
1971	-26.529	-3.67061	-6.95528	-24.7859	-1.9036	-14.8595
1972	-26.4651	-3.78858	-7.4146	-24.7016	-1.89776	-15.4102
1973	-26.4069	-3.88694	-7.8764	-24.6275	-1.87723	-15.912
1974	-26.3537	-3.96655	-8.34025	-24.5621	-1.8449	-16.3646
1975	-26.3043	-4.02845	-8.80539	-24.5041	-1.80376	-16.7679
1976	-26.2579	-4.07387	-9.27072	-24.4521	-1.75682	-17.1214
1977	-26.2135	-4.10418	-9.73485	-24.4052	-1.70708	-17.425
1978	-26.1701	-4.12087	-10.1961	-24.3624	-1.65737	-17.6786
1979	-26.1269	-4.12555	-10.6526	-24.3234	-1.61033	-17.8823
1980	-26.083	-4.1199	-11.1021	-24.2878	-1.5683	-18.0365
1981	-26.0377	-4.10565	-11.5423	-24.2555	-1.53329	-18.1423
1982	-25.9904	-4.08459	-11.9709	-24.2267	-1.50697	-18.2008
1983	-25.9404	-4.0585	-12.3851	-24.2019	-1.49061	-18.214
1984	-25.8875	-4.02916	-12.7824	-24.1813	-1.48515	-18.1841
1985	-25.8312	-3.99831	-13.1601	-24.1656	-1.49118	-18.1139
1986	-25.7715	-3.96765	-13.5157	-24.1549	-1.50902	-18.0066
1987	-25.7083	-3.93881	-13.8465	-24.1495	-1.53878	-17.8657
1988	-25.6418	-3.91331	-14.1501	-24.1496	-1.58042	-17.6948
1989	-25.572	-3.8926	-14.4242	-24.1547	-1.63379	-17.4975
1990	-25.4996	-3.87798	-14.6667	-24.1644	-1.69871	-17.2775
1991	-25.4248	-3.87064	-14.8755	-24.1778	-1.77501	-17.0381
1992	-25.3483	-3.87163	-15.049	-24.1939	-1.86253	-16.7821
1993	-25.2708	-3.88184	-15.1857	-24.2112	-1.96118	-16.5118
1994	-25.193	-3.90199	-15.2844	-24.2284	-2.07089	-16.2293
1995	-25.1158	-3.93265	-15.3441	-24.2437	-2.19165	-15.9354
1996	-25.0401	-3.97423	-15.3643	-24.2558	-2.3234	-15.631
1997	-24.967	-4.02696	-15.3446	-24.2633	-2.46611	-15.3159
1998	-24.8973	-4.09087	-15.2848	-24.2651	-2.61965	-14.9897
1999	-24.8321	-4.16586	-15.1853	-24.2605	-2.78382	-14.6518
2000	-24.7724	-4.25163	-15.0465	-24.2492	-2.95829	-14.3013
2001	-24.7194	-4.34772	-14.8691	-24.2318	-3.1426	-13.9375
2002	-24.674	-4.4535	-14.654	-24.209	-3.33613	-13.5598
2003	-24.6373	-4.56819	-14.4025	-24.1825	-3.53812	-13.168
2004	-24.6102	-4.69085	-14.1159	-24.1546	-3.74766	-12.7626
2005	-24.5936	-4.8204	-13.7958	-24.1278	-3.9637	-12.3445
2006	-24.5886	-4.95563	-13.4437	-24.1054	-4.18508	-11.9153
2007	-24.5959	-5.09521	-13.0614	-24.0909	-4.41053	-11.4773
2008	-24.6164	-5.23768	-12.6508	-24.088	-4.63873	-11.0332
2009	-24.6506	-5.3815	-12.2138	-24.1003	-4.86831	-10.586
2010	-24.6993	-5.52505	-11.7523	-24.1316	-5.09788	-10.1392
2011	-24.763	-5.66663	-11.2682	-24.1851	-5.32604	-9.69606
2012	-24.842	-5.80447	-10.7637	-24.2641	-5.55142	-9.2596
2013	-24.9366	-5.93679	-10.2405	-24.371	-5.7727	-8.83245
2014	-25.0471	-6.06178	-9.70068	-24.5079	-5.98858	-8.41649
2015	-25.1734	-6.17761	-9.14608	-24.6763	-6.19779	-8.01269
2016	-25.3154	-6.28248	-8.57859	-24.8771	-6.39909	-7.62095
2017	-25.4729	-6.37462	-8.00005	-25.1103	-6.59125	-7.24001
2018	-25.6453	-6.45229	-7.41228	-25.3754	-6.77298	-6.86739
2019	-25.8321	-6.51384	-6.81705	-25.6713	-6.94294	-6.49942
2020	-26.0326	-6.5577	-6.21612	-25.9959	-7.09966	-6.13133
2021	-26.2456	-6.5824	-5.61123	-26.3465	-7.24153	-5.7574
2022	-26.4702	-6.58659	-5.00409	-26.7197	-7.36676	-5.37116
2023	-26.7049	-6.56906	-4.3964	-27.1114	-7.47337	-4.96564
2024	-26.9483	-6.52877	-3.78984	-27.5167	-7.55919	-4.53365
2025	-27.1989	-6.46483	-3.18606	-27.9304	-7.62191	-4.06809
2026	-27.4548	-6.37655	-2.58669	-28.3465	-7.65913	-3.56223
2027	-27.7141	-6.26344	-1.99329	-28.7589	-7.66844	-3.01004
2028	-27.9749	-6.12522	-1.40739	-29.1614	-7.64752	-2.40644
2029	-28.2352	-5.96185	-0.830427	-29.5475	-7.59429	-1.74756
2030	-28.4929	-5.77351	-0.263726	-29.9115	-7.50699	-1.03091
2031	-28.7457	-5.56061	0.291506	-30.2479	-7.38432	-0.255522
2032	-28.9917	-5.32383	0.834228	-30.5521	-7.22556	0.577984
2033	-29.2289	-5.06408	1.36359	-30.8204	-7.03068	1.46741
2034	-29.4551	-4.78251	1.87896	-31.0504	-6.80034	2.40904
2035	-29.6686	-4.48052	2.37996	-31.2407	-6.536	3.39782
2036	-29.8676	-4.15974	2.86651	-31.3914	-6.23985	4.4275
2037	-30.0506	-3.82202	3.33881	-31.5038	-5.9148	5.49093
2038	-30.2163	-3.46941	3.79742	-31.5804	-5.56443	6.5803
2039	-30.3634	-3.10415	4.24321	-31.6247	-5.19282	7.68747
2040	-30.4912	-2.72864	4.67743	-31.641	-4.80447	8.80421
2041	-30.5989	-2.34543	5.10167	-31.6342	-4.40414	9.92251
2042	-30.6862	-1.95714	5.51784	-31.6094	-3.99671	11.0348
2043	-30.7531	-1.56653	5.9282	-31.5718	-3.58703	12.1343
2044	-30.7996	-1.17634	6.33527	-31.5262	-3.17975	13.2148
2045	-30.8263	-0.789358	6.74185	-31.4771	-2.77925	14.2713
2046	-30.8337	-0.408318	7.15091	-31.4281	-2.38948	15.2996
2047	-30.823	-0.0358929	7.56558	-31.3822	-2.01388	16.2967
2048	-30.7951	0.325357	7.98907	-31.3415	-1.65536	17.2604
2049	-30.7516	0.673019	8.42459	-31.307	-1.31617	18.1896
2050	-30.6939	1.00486	8.87529	-31.2791	-0.997957	19.0839
2051	-30.6237	1.31888	9.34417	-31.2576	-0.701718	19.9434
2052	-30.5429	1.6133	9.83404	-31.2413	-0.427853	20.7689
2053	-30.4532	1.88666	10.3474	-31.2289	-0.176202	21.5615
2054	-30.3567	2.13775	10.8864	-31.2185	0.0538817	22.3225
2055	-30.2552	2.36574	11.4527	-31.2085	0.263449	23.0533
2056	-30.1508	2.57008	12.0477	-31.1969	0.453863	23.755
2057	-30.0452	2.75059	12.672	-31.1821	0.626698	24.4289
2058	-29.9404	2.90744	13.3258	-31.1626	0.783647	25.0757
2059	-29.8381	3.04111	14.0087	-31.1374	0.926437	25.6958
2060	-29.7399	3.15243	14.7197	-31.1057	1.05675	26.2895
2061	-29.6473	3.24256	15.4573	-31.0672	1.17619	26.8565
2062	-29.5616	3.31292	16.2192	-31.0221	1.2862	27.3962
2063	-29.484	3.36522	17.0028	-30.9708	1.38812	27.9076
2064	-29.4156	3.4014	17.8048	-30.914	1.48311	28.3895
2065	-29.3573	3.42361	18.6215	-30.8529	1.57225	28.8406
2066	-29.3097	3.43416	19.4489	-30.7888	1.65649	29.2592
2067	-29.2733	3.4355	20.2824	-30.7231	1.73677	29.6439
2068	-29.2487	3.43014	21.1173	-30.6574	1.81401	29.9932
2069	-29.236	3.42066	21.9488	-30.5933	1.88916	30.3058
2070	-29.2352	3.40961	22.7716	-30.5324	1.96321	30.5808
2071	-29.2465	3.39954	23.5807	-30.4762	2.03724	30.8176
2072	-29.2696	3.39287	24.3711	-30.4259	2.1124	31.0159
2073	-29.3042	3.39193	25.1376	-30.3828	2.18989	31.1761
2074	-29.35	3.39888	25.8756	-30.3478	2.27095	31.2987
2075	-29.4066	3.41569	26.5804	-30.3215	2.35679	31.385
2076	-29.4733	3.44409	27.2478	-30.3046	2.4486	31.4366
2077	-29.5496	3.4856	27.874	-30.2972	2.54742	31.4555
2078	-29.6349	3.54143	28.4553	-30.2994	2.65416	31.444
2079	-29.7283	3.61254	28.9887	-30.3111	2.76954	31.4046
2080	-29.8292	3.69958	29.4717	-30.3319	2.89403	31.3402
2081	-29.9367	3.80288	29.902	-30.3616	3.02787	31.2537
2082	-30.0501	3.9225	30.2782	-30.3996	3.17103	31.1481
2083	-30.1685	4.05817	30.599	-30.4455	3.32323	31.0264
2084	-30.2909	4.20936	30.8638	-30.4988	3.48396	30.8917
2085	-30.4167	4.37523	31.0722	-30.5592	3.65249	30.7468
2086	-30.5448	4.55471	31.2246	-30.6263	3.8279	30.5945
2087	-30.6745	4.74647	31.3215	-30.6999	4.00912	30.4374
2088	-30.8047	4.94897	31.3638	-30.7798	4.19493	30.2779
2089	-30.9348	5.16048	31.3528	-30.8658	4.38401	30.118
2090	-31.0638	5.37914	31.2899	-30.9579	4.57494	29.9598
2091	-31.1909	5.60292	31.1768	-31.0558	4.76621	29.8046
2092	-31.3154	5.82972	31.0154	-31.1595	4.95626	29.6539
2093	-31.4364	6.05737	30.8075	-31.2687	5.14345	29.5085
2094	-31.5533	6.28369	30.5553	-31.383	5.3261	29.369
2095	-31.6653	6.50647	30.2608	-31.502	5.5025	29.2358
2096	-31.7719	6.72357	29.926	-31.6251	5.67094	29.1087
2097	-31.8725	6.93288	29.5527	-31.7517	5.82976	28.9872
2098	-31.9666	7.1324	29.143	-31.881	5.97737	28.8704
2099	-32.0537	7.32026	28.6986	-32.0122	6.11236	28.7569
2100	-32.1335	7.49471	28.2212	-32.1448	6.23352	28.645

## Sheet: Participants 2
Row data
	Video camera-type kayak motion capture system			Optical motion capture system
Frame	Tilt	Turn	Rotation	Tilt	Turn	Rotation
3021	-16.0274	0.180696	-8.43245	-12.6975	2.6936	-3.93857
3022	-15.8096	-0.353152	-9.2059	-12.564	2.18293	-5.07298
3023	-15.5961	-0.895871	-9.96498	-12.4323	1.65204	-6.21607
3024	-15.3914	-1.44614	-10.7106	-12.3028	1.10304	-7.3648
3025	-15.1989	-2.0024	-11.4441	-12.176	0.538285	-8.51591
3026	-15.0215	-2.56286	-12.1668	-12.0522	-0.0397237	-9.66596
3027	-14.8615	-3.12558	-12.8805	-11.9318	-0.628329	-10.8113
3028	-14.7204	-3.68846	-13.5868	-11.8153	-1.22476	-11.9482
3029	-14.5993	-4.24933	-14.2873	-11.7029	-1.82618	-13.0728
3030	-14.4987	-4.80593	-14.9837	-11.5948	-2.42969	-14.1811
3031	-14.4187	-5.35604	-15.6774	-11.4914	-3.0324	-15.2691
3032	-14.3593	-5.89744	-16.3697	-11.3928	-3.63145	-16.3329
3033	-14.3196	-6.42796	-17.0616	-11.2991	-4.22403	-17.3686
3034	-14.2991	-6.94558	-17.7537	-11.2107	-4.80744	-18.3724
3035	-14.2965	-7.44836	-18.4466	-11.1275	-5.37911	-19.3406
3036	-14.3107	-7.93457	-19.1403	-11.0497	-5.93665	-20.2697
3037	-14.3405	-8.40263	-19.8345	-10.9775	-6.47782	-21.1567
3038	-14.3843	-8.85119	-20.5287	-10.9109	-7.00064	-21.9984
3039	-14.4407	-9.2791	-21.2219	-10.8501	-7.50333	-22.7923
3040	-14.5083	-9.68546	-21.9128	-10.7952	-7.98438	-23.536
3041	-14.5856	-10.0696	-22.5996	-10.7464	-8.44254	-24.2276
3042	-14.6712	-10.431	-23.2805	-10.7038	-8.87682	-24.8656
3043	-14.7639	-10.7696	-23.9532	-10.6676	-9.28653	-25.4487
3044	-14.8622	-11.0854	-24.6151	-10.6379	-9.67123	-25.9763
3045	-14.9651	-11.3785	-25.2633	-10.6151	-10.0307	-26.4478
3046	-15.0714	-11.6494	-25.895	-10.5994	-10.3652	-26.8632
3047	-15.18	-11.8988	-26.5068	-10.591	-10.6749	-27.223
3048	-15.2901	-12.1274	-27.0954	-10.5901	-10.9605	-27.5279
3049	-15.4008	-12.3362	-27.6574	-10.5971	-11.2227	-27.7788
3050	-15.5113	-12.5263	-28.1892	-10.6123	-11.4625	-27.9771
3051	-15.6208	-12.6987	-28.6873	-10.6359	-11.6811	-28.1244
3052	-15.7288	-12.8548	-29.148	-10.6681	-11.8797	-28.2225
3053	-15.8344	-12.9959	-29.568	-10.7092	-12.0598	-28.2733
3054	-15.9372	-13.1233	-29.9437	-10.7595	-12.2229	-28.279
3055	-16.0366	-13.2383	-30.272	-10.819	-12.3705	-28.2419
3056	-16.132	-13.3422	-30.5498	-10.888	-12.5041	-28.1641
3057	-16.2227	-13.4365	-30.7742	-10.9664	-12.6255	-28.048
3058	-16.3083	-13.5224	-30.9425	-11.0543	-12.7361	-27.8958
3059	-16.3881	-13.6009	-31.0523	-11.1516	-12.8376	-27.7098
3060	-16.4616	-13.6733	-31.1017	-11.2582	-12.9313	-27.492
3061	-16.5282	-13.7406	-31.0889	-11.3738	-13.0186	-27.2444
3062	-16.5872	-13.8035	-31.0126	-11.4981	-13.1008	-26.9689
3063	-16.6382	-13.8628	-30.8716	-11.6307	-13.179	-26.667
3064	-16.6805	-13.9192	-30.6653	-11.7711	-13.2542	-26.3403
3065	-16.7135	-13.9731	-30.3935	-11.9188	-13.3272	-25.9898
3066	-16.7369	-14.0248	-30.0562	-12.0729	-13.3987	-25.6167
3067	-16.75	-14.0743	-29.654	-12.2327	-13.4691	-25.2216
3068	-16.7526	-14.1216	-29.1877	-12.3974	-13.5387	-24.8051
3069	-16.7442	-14.1665	-28.6585	-12.5659	-13.6076	-24.3676
3070	-16.7246	-14.2087	-28.0679	-12.7372	-13.6757	-23.909
3071	-16.6936	-14.2474	-27.4179	-12.9102	-13.7426	-23.4293
3072	-16.6511	-14.2821	-26.7106	-13.0837	-13.8079	-22.9282
3073	-16.5972	-14.3117	-25.9486	-13.2564	-13.8709	-22.4051
3074	-16.5321	-14.3354	-25.1344	-13.4272	-13.9306	-21.8595
3075	-16.4559	-14.352	-24.2711	-13.5947	-13.9861	-21.2905
3076	-16.3692	-14.3601	-23.3618	-13.7576	-14.0361	-20.6975
3077	-16.2722	-14.3584	-22.4098	-13.9146	-14.0793	-20.0793
3078	-16.1657	-14.3454	-21.4184	-14.0644	-14.114	-19.4352
3079	-16.0504	-14.3198	-20.3912	-14.2057	-14.1389	-18.7641
3080	-15.927	-14.2798	-19.3317	-14.3375	-14.152	-18.0651
3081	-15.7963	-14.2241	-18.2432	-14.4585	-14.1516	-17.3375
3082	-15.6594	-14.151	-17.1294	-14.5676	-14.136	-16.5804
3083	-15.5172	-14.0591	-15.9934	-14.6641	-14.1031	-15.7933
3084	-15.3707	-13.9469	-14.8386	-14.7469	-14.0513	-14.9757
3085	-15.221	-13.8131	-13.668	-14.8155	-13.9786	-14.1273
3086	-15.0691	-13.6566	-12.4844	-14.8691	-13.8832	-13.248
3087	-14.9162	-13.4762	-11.2905	-14.9075	-13.7635	-12.3381
3088	-14.7631	-13.2711	-10.0886	-14.9302	-13.618	-11.3979
3089	-14.6111	-13.0406	-8.88076	-14.9372	-13.4452	-10.428
3090	-14.4609	-12.784	-7.66881	-14.9284	-13.2439	-9.42946
3091	-14.3137	-12.5012	-6.4542	-14.9041	-13.013	-8.40338
3092	-14.1702	-12.192	-5.23813	-14.8646	-12.7518	-7.35126
3093	-14.0314	-11.8566	-4.02149	-14.8103	-12.4596	-6.27483
3094	-13.8979	-11.4955	-2.80488	-14.7419	-12.1362	-5.17608
3095	-13.7706	-11.1091	-1.58868	-14.6601	-11.7815	-4.05726
3096	-13.65	-10.6984	-0.373028	-14.5658	-11.3959	-2.92084
3097	-13.5368	-10.2644	0.842125	-14.46	-10.9799	-1.76952
3098	-13.4316	-9.80844	2.05695	-14.3438	-10.5343	-0.606213
3099	-13.3347	-9.33197	3.2717	-14.2183	-10.0603	0.566027
3100	-13.2466	-8.83664	4.48667	-14.0848	-9.55949	1.74397
3101	-13.1676	-8.32425	5.70208	-13.9446	-9.03345	2.92426
3102	-13.0979	-7.79675	6.9181	-13.799	-8.48422	4.10345
3103	-13.0379	-7.25617	8.1347	-13.6495	-7.91402	5.27803
3104	-12.9875	-6.70466	9.35163	-13.4973	-7.32529	6.44441
3105	-12.9469	-6.14439	10.5684	-13.3439	-6.72065	7.59902
3106	-12.916	-5.5776	11.784	-13.1907	-6.10287	8.73829
3107	-12.8947	-5.00651	12.9974	-13.0389	-5.47484	9.85867
3108	-12.8829	-4.43335	14.2067	-12.8899	-4.83953	10.9567
3109	-12.8802	-3.86028	15.4099	-12.7449	-4.19995	12.029
3110	-12.8864	-3.28944	16.6045	-12.6052	-3.55912	13.0723
3111	-12.901	-2.72286	17.7872	-12.4718	-2.92005	14.0834
3112	-12.9235	-2.16249	18.9546	-12.3457	-2.28566	15.0594
3113	-12.9534	-1.61017	20.1028	-12.2281	-1.6588	15.9974
3114	-12.99	-1.06761	21.2274	-12.1197	-1.04219	16.8949
3115	-13.0325	-0.536387	22.3236	-12.0213	-0.438381	17.7495
3116	-13.0801	-0.0179489	23.3864	-11.9337	0.150226	18.5588
3117	-13.132	0.486415	24.4104	-11.8575	0.72144	19.3211
3118	-13.1872	0.975561	25.3904	-11.7931	1.27328	20.0345
3119	-13.2447	1.4485	26.3206	-11.7411	1.80401	20.6976
3120	-13.3033	1.90439	27.1955	-11.7016	2.3121	21.3092
3121	-13.3621	2.34255	28.0097	-11.675	2.79628	21.8683
3122	-13.4197	2.76242	28.7576	-11.6613	3.25555	22.3743
3123	-13.475	3.1636	29.4344	-11.6605	3.6891	22.8266
3124	-13.5268	3.54582	30.035	-11.6725	4.09643	23.2251
3125	-13.5739	3.90893	30.5552	-11.6972	4.47721	23.5699
3126	-13.615	4.25288	30.9909	-11.7342	4.83139	23.8611
3127	-13.649	4.57775	31.3388	-11.7831	5.1591	24.0994
3128	-13.6746	4.88367	31.5961	-11.8434	5.46067	24.2855
3129	-13.6909	5.17089	31.7604	-11.9145	5.73663	24.4203
3130	-13.6968	5.4397	31.8304	-11.9958	5.98766	24.5048
3131	-13.6914	5.69043	31.8051	-12.0864	6.21459	24.5405
3132	-13.674	5.92346	31.6845	-12.1855	6.41837	24.5286
3133	-13.6439	6.13918	31.4691	-12.2922	6.60007	24.4708
3134	-13.6007	6.33801	31.1603	-12.4054	6.76082	24.3687
3135	-13.544	6.52033	30.7603	-12.5241	6.90183	24.224
3136	-13.4739	6.68651	30.2717	-12.6471	7.02433	24.0386
3137	-13.3905	6.8369	29.6982	-12.7733	7.12958	23.8143
3138	-13.2942	6.97179	29.0438	-12.9015	7.21881	23.5528
3139	-13.1856	7.0914	28.3134	-13.0304	7.29325	23.2562
3140	-13.0658	7.19593	27.5123	-13.1588	7.35405	22.926
3141	-12.9357	7.28546	26.6465	-13.2855	7.40233	22.5643
3142	-12.797	7.36002	25.7224	-13.4093	7.43907	22.1725
3143	-12.6513	7.41955	24.747	-13.5289	7.46519	21.7524
3144	-12.5007	7.4639	23.7276	-13.6432	7.48147	21.3053
3145	-12.3473	7.49284	22.6718	-13.7512	7.48853	20.8327
3146	-12.1936	7.50607	21.5875	-13.8517	7.48689	20.3359
3147	-12.0424	7.50321	20.4829	-13.9438	7.47686	19.8158
3148	-11.8964	7.48379	19.3662	-14.0266	7.45863	19.2734
3149	-11.7588	7.44731	18.2457	-14.0993	7.43219	18.7095
3150	-11.6325	7.39318	17.1298	-14.1613	7.39737	18.1246
3151	-11.5208	7.32082	16.0267	-14.212	7.35382	17.5193
3152	-11.4269	7.22958	14.9442	-14.2509	7.30105	16.8937
3153	-11.354	7.11881	13.8903	-14.2778	7.23837	16.248
3154	-11.3052	6.98788	12.8722	-14.2923	7.16499	15.5822
3155	-11.2835	6.83616	11.8967	-14.2945	7.07996	14.896
3156	-11.2915	6.66307	10.9703	-14.2844	6.9822	14.1892
3157	-11.3319	6.46805	10.0986	-14.2621	6.87057	13.4614
3158	-11.4068	6.25064	9.28643	-14.2281	6.74384	12.7121
3159	-11.518	6.01043	8.53792	-14.1826	6.60071	11.9408
3160	-11.6671	5.74711	7.85619	-14.1263	6.43988	11.1469
3161	-11.8549	5.46049	7.24339	-14.0598	6.26006	10.33
3162	-12.082	5.15047	6.70058	-13.9839	6.05997	9.48951
3163	-12.3484	4.81707	6.22772	-13.8993	5.83843	8.62502
3164	-12.6534	4.46045	5.82357	-13.807	5.59431	7.73621
3165	-12.9959	4.08091	5.48574	-13.708	5.32664	6.82293
3166	-13.3744	3.67888	5.21062	-13.6032	5.03458	5.88517
3167	-13.7864	3.25491	4.99343	-13.4938	4.71748	4.92316
3168	-14.2295	2.80971	4.82823	-13.3808	4.37488	3.93735
3169	-14.7002	2.34413	4.70801	-13.2653	4.00655	2.92848
3170	-15.1948	1.85914	4.62475	-13.1484	3.6125	1.89755
3171	-15.7094	1.35584	4.56954	-13.0313	3.19299	0.84589
3172	-16.2395	0.835469	4.5327	-12.9148	2.74855	-0.224848
3173	-16.7802	0.299362	4.50395	-12.8002	2.27997	-1.31269
3174	-17.3267	-0.251025	4.47256	-12.6882	1.78833	-2.41532
3175	-17.8738	-0.814141	4.42755	-12.5798	1.27495	-3.53011
3176	-18.4163	-1.38835	4.35791	-12.4758	0.741433	-4.6541
3177	-18.9492	-1.97192	4.25278	-12.3769	0.189609	-5.78407
3178	-19.4671	-2.56308	4.10166	-12.2838	-0.378456	-6.91651
3179	-19.9653	-3.15998	3.89467	-12.1971	-0.960496	-8.04766
3180	-20.439	-3.76073	3.6227	-12.1171	-1.55407	-9.17358
3181	-20.8839	-4.36342	3.27763	-12.0444	-2.15657	-10.2902
3182	-21.2958	-4.9661	2.85251	-11.9791	-2.76529	-11.3933
3183	-21.6714	-5.56685	2.3417	-11.9215	-3.37744	-12.4785
3184	-22.0075	-6.16371	1.74102	-11.8716	-3.99016	-13.5418
3185	-22.3016	-6.75478	1.04782	-11.8296	-4.60061	-14.5787
3186	-22.5517	-7.33814	0.261076	-11.7954	-5.20595	-15.5852
3187	-22.7566	-7.91197	-0.618576	-11.7689	-5.8034	-16.5573
3188	-22.9157	-8.47446	-1.58886	-11.7499	-6.3903	-17.4913
3189	-23.0287	-9.02386	-2.64585	-11.7384	-6.96409	-18.3836
3190	-23.0964	-9.55853	-3.7841	-11.734	-7.52239	-19.231
3191	-23.12	-10.0769	-4.99666	-11.7366	-8.063	-20.0306
3192	-23.1013	-10.5774	-6.27523	-11.746	-8.58393	-20.78
3193	-23.0426	-11.0587	-7.61035	-11.762	-9.08342	-21.4768
3194	-22.9468	-11.5195	-8.99147	-11.7842	-9.55998	-22.1195
3195	-22.8171	-11.9587	-10.4072	-11.8126	-10.0123	-22.7067
3196	-22.6573	-12.3752	-11.8456	-11.8471	-10.4396	-23.2376
3197	-22.4712	-12.7681	-13.2941	-11.8874	-10.8409	-23.7116
3198	-22.2632	-13.1366	-14.74	-11.9335	-11.216	-24.1289
3199	-22.0373	-13.4802	-16.1705	-11.9853	-11.5647	-24.4897
3200	-21.798	-13.7984	-17.5731	-12.0429	-11.887	-24.7949
3201	-21.5496	-14.0908	-18.9353	-12.1062	-12.1834	-25.0455
3202	-21.2962	-14.3574	-20.2455	-12.1754	-12.4544	-25.2429
3203	-21.0417	-14.5983	-21.4926	-12.2504	-12.7007	-25.389
3204	-20.7897	-14.8135	-22.6664	-12.3315	-12.9235	-25.4857
3205	-20.5436	-15.0035	-23.7574	-12.4187	-13.1237	-25.535
3206	-20.3062	-15.1688	-24.7574	-12.5122	-13.3028	-25.5394
3207	-20.0799	-15.31	-25.6593	-12.6119	-13.462	-25.5012
3208	-19.8667	-15.4281	-26.457	-12.7181	-13.6028	-25.4229
3209	-19.668	-15.5238	-27.1457	-12.8307	-13.7267	-25.3069
3210	-19.4848	-15.5982	-27.7217	-12.9498	-13.8351	-25.1557
3211	-19.3173	-15.6525	-28.1828	-13.0753	-13.9297	-24.9716
3212	-19.1655	-15.6878	-28.5277	-13.207	-14.0117	-24.7567
3213	-19.0289	-15.7052	-28.7562	-13.3448	-14.0826	-24.5133
3214	-18.9065	-15.706	-28.8693	-13.4883	-14.1436	-24.243
3215	-18.7968	-15.6913	-28.8691	-13.6371	-14.1959	-23.9476
3216	-18.6984	-15.6623	-28.7583	-13.7908	-14.2403	-23.6284
3217	-18.6092	-15.62	-28.5408	-13.9487	-14.2777	-23.2866
3218	-18.527	-15.5652	-28.221	-14.1101	-14.3088	-22.9229
3219	-18.4498	-15.4989	-27.8041	-14.2743	-14.3339	-22.5381
3220	-18.3751	-15.4215	-27.2956	-14.4402	-14.3532	-22.1323
3221	-18.3007	-15.3337	-26.7018	-14.6069	-14.3668	-21.7057
3222	-18.2243	-15.2357	-26.029	-14.7733	-14.3743	-21.258
3223	-18.1439	-15.1275	-25.2841	-14.9382	-14.3754	-20.7887
3224	-18.0575	-15.0091	-24.4738	-15.1004	-14.3693	-20.2972
3225	-17.9635	-14.8801	-23.6052	-15.2585	-14.3552	-19.7827
3226	-17.8603	-14.7402	-22.6852	-15.4113	-14.332	-19.2441
3227	-17.7468	-14.5886	-21.7207	-15.5574	-14.2985	-18.6802
3228	-17.6221	-14.4246	-20.7182	-15.6954	-14.2533	-18.09
3229	-17.4856	-14.2471	-19.6844	-15.8242	-14.1947	-17.4721
3230	-17.337	-14.0551	-18.6252	-15.9423	-14.1212	-16.8252
3231	-17.1764	-13.8474	-17.5464	-16.0486	-14.0311	-16.1482
3232	-17.0041	-13.6228	-16.4534	-16.1421	-13.9224	-15.4398
3233	-16.8206	-13.3801	-15.351	-16.2216	-13.7935	-14.6992
3234	-16.6267	-13.118	-14.2436	-16.2864	-13.6425	-13.9253
3235	-16.4235	-12.8352	-13.135	-16.3356	-13.4677	-13.1175
3236	-16.2121	-12.5308	-12.0285	-16.3687	-13.2674	-12.2753
3237	-15.994	-12.2036	-10.9265	-16.3853	-13.0402	-11.3986
3238	-15.7705	-11.8529	-9.83137	-16.3851	-12.7845	-10.4873
3239	-15.5433	-11.4778	-8.7444	-16.3681	-12.4992	-9.54192
3240	-15.3139	-11.0779	-7.66651	-16.3344	-12.1833	-8.56298
3241	-15.0841	-10.6529	-6.59803	-16.2842	-11.8362	-7.55149
3242	-14.8554	-10.2027	-5.53877	-16.218	-11.4573	-6.50875
3243	-14.6295	-9.72757	-4.48802	-16.1366	-11.0464	-5.43635
3244	-14.408	-9.22792	-3.44467	-16.0407	-10.6038	-4.33621
3245	-14.1924	-8.70446	-2.40723	-15.9313	-10.1298	-3.21055
3246	-13.9843	-8.15817	-1.3739	-15.8095	-9.62531	-2.06186
3247	-13.7849	-7.59027	-0.342662	-15.6766	-9.09142	-0.892914
3248	-13.5956	-7.00222	0.688656	-15.5339	-8.52959	0.293292
3249	-13.4175	-6.39573	1.72227	-15.3829	-7.94159	1.49353
3250	-13.2518	-5.77271	2.76035	-15.2252	-7.32948	2.7044
3251	-13.0994	-5.13524	3.80494	-15.0621	-6.69563	3.92234
3252	-12.9611	-4.48559	4.85785	-14.8955	-6.04265	5.14364
3253	-12.8377	-3.82616	5.9206	-14.7269	-5.37338	6.36452
3254	-12.7298	-3.15947	6.99429	-14.5578	-4.69086	7.58112
3255	-12.6379	-2.4881	8.07956	-14.39	-3.99826	8.78957
3256	-12.5622	-1.81468	9.1765	-14.225	-3.29889	9.98596
3257	-12.503	-1.1419	10.2847	-14.0642	-2.59614	11.1665
3258	-12.4604	-0.47238	11.4029	-13.9091	-1.89342	12.3272
3259	-12.4343	0.191252	12.5295	-13.7609	-1.19412	13.4646
3260	-12.4245	0.846459	13.6621	-13.6211	-0.5016	14.5749
3261	-12.4308	1.49079	14.7976	-13.4906	0.180893	15.6547
3262	-12.4527	2.12192	15.9324	-13.3705	0.85023	16.7006
3263	-12.4896	2.73765	17.0622	-13.2617	1.50345	17.7095
3264	-12.5409	3.33597	18.1825	-13.165	2.1378	18.6784
3265	-12.6057	3.91501	19.288	-13.0811	2.75074	19.6045
3266	-12.6831	4.47313	20.3731	-13.0103	3.33998	20.4853
3267	-12.7721	5.00885	21.4322	-12.9532	3.90351	21.3184
3268	-12.8716	5.52095	22.4592	-12.91	4.4396	22.1016
3269	-12.9803	6.00838	23.4481	-12.8808	4.94681	22.8331
3270	-13.0971	6.47034	24.393	-12.8656	5.42399	23.5113
3271	-13.2204	6.90622	25.2879	-12.8642	5.87031	24.1347
3272	-13.349	7.31563	26.1272	-12.8765	6.28521	24.7022
3273	-13.4813	7.69839	26.9056	-12.902	6.66844	25.2129
3274	-13.6158	8.0545	27.6182	-12.9402	7.02002	25.666
3275	-13.7512	8.38414	28.2606	-12.9905	7.34022	26.0612
3276	-13.8858	8.68765	28.8288	-13.0523	7.62956	26.3981
3277	-14.0182	8.96554	29.3195	-13.1248	7.8888	26.6768
3278	-14.147	9.2184	29.7302	-13.2069	8.11888	26.8975
3279	-14.2708	9.44698	30.0589	-13.2978	8.32092	27.0607
3280	-14.3883	9.65209	30.3041	-13.3965	8.49622	27.1668
3281	-14.4982	9.83459	30.4654	-13.5017	8.64617	27.2168
3282	-14.5994	9.9954	30.5428	-13.6124	8.77228	27.2115
3283	-14.691	10.1355	30.537	-13.7273	8.87615	27.1522
3284	-14.772	10.2557	30.4492	-13.845	8.95939	27.0401
3285	-14.8417	10.3571	30.2813	-13.9645	9.02367	26.8766
3286	-14.8994	10.4405	30.0358	-14.0842	9.07064	26.6633
3287	-14.9449	10.5066	29.7154	-14.2029	9.10193	26.4018
3288	-14.9776	10.5563	29.3235	-14.3193	9.11912	26.094
3289	-14.9976	10.5902	28.8635	-14.432	9.1237	25.7416
3290	-15.0048	10.6089	28.3393	-14.5399	9.11711	25.3467
3291	-14.9995	10.6128	27.7548	-14.6416	9.10064	24.9112
3292	-14.982	10.6023	27.1142	-14.7361	9.07547	24.437
3293	-14.9529	10.5775	26.4217	-14.8221	9.04263	23.9264
3294	-14.9127	10.5385	25.6813	-14.8987	9.00302	23.3813
3295	-14.8623	10.4854	24.8973	-14.9648	8.95733	22.8039
3296	-14.8026	10.418	24.0735	-15.0197	8.90612	22.1961
3297	-14.7346	10.3359	23.2137	-15.0626	8.84972	21.56
3298	-14.6594	10.2389	22.3216	-15.0928	8.78832	20.8975
3299	-14.5783	10.1264	21.4006	-15.1099	8.72188	20.2106
3300	-14.4925	9.99783	20.4538	-15.1133	8.65021	19.501
3301	-14.4033	9.85257	19.4841	-15.1029	8.57292	18.7704
3302	-14.3121	9.68988	18.4941	-15.0784	8.48943	18.0205
3303	-14.2202	9.50899	17.4863	-15.0399	8.39902	17.2528
3304	-14.129	9.3091	16.4626	-14.9875	8.30077	16.4686
3305	-14.0397	9.0894	15.4249	-14.9214	8.19366	15.6691
3306	-13.9537	8.84905	14.3749	-14.842	8.07653	14.8554
3307	-13.8721	8.58728	13.3139	-14.7497	7.94808	14.0284
3308	-13.7961	8.30334	12.243	-14.6453	7.80697	13.1889
3309	-13.7267	7.99654	11.1632	-14.5294	7.65177	12.3377
3310	-13.6649	7.66629	10.0753	-14.4028	7.481	11.4751
3311	-13.6114	7.3121	8.97981	-14.2665	7.29318	10.6017
3312	-13.5671	6.93359	7.87722	-14.1215	7.08685	9.71767
3313	-13.5325	6.53055	6.76779	-13.9688	6.86057	8.82335
3314	-13.5082	6.10291	5.6517	-13.8096	6.61299	7.91886
3315	-13.4945	5.65079	4.52899	-13.6451	6.34283	7.00435
3316	-13.4918	5.17449	3.39961	-13.4766	6.04896	6.07992
3317	-13.5002	4.67451	2.26344	-13.3052	5.7304	5.14571
3318	-13.5199	4.15156	1.12033	-13.1323	5.38632	4.20191
3319	-13.5508	3.60657	-0.0299352	-12.9591	5.01613	3.24875
3320	-13.5929	3.04067	-1.18754	-12.7868	4.61943	2.28658
3321	-13.6461	2.45523	-2.35264	-12.6166	4.19607	1.31588
3322	-13.7101	1.85182	-3.52532	-12.4497	3.74615	0.337268
3323	-13.7846	1.2322	-4.70555	-12.2872	3.27005	-0.648477
3324	-13.8694	0.598349	-5.89315	-12.1301	2.7684	-1.64038
3325	-13.9639	-0.0475985	-7.08773	-11.9793	2.24212	-2.63726
3326	-14.0678	-0.703339	-8.28867	-11.8357	1.6924	-3.63775
3327	-14.1804	-1.36643	-9.49508	-11.7	1.12069	-4.64024
3328	-14.3012	-2.03433	-10.7057	-11.573	0.528697	-5.64295
3329	-14.4295	-2.7044	-11.9191	-11.4551	-0.0816176	-6.64387
3330	-14.5645	-3.37395	-13.1331	-11.3468	-0.708081	-7.64079
3331	-14.7056	-4.04027	-14.3456	-11.2485	-1.34832	-8.63135
3332	-14.8518	-4.70064	-15.5537	-11.1604	-1.99978	-9.61303
3333	-15.0024	-5.35242	-16.7543	-11.0825	-2.65978	-10.5832
3334	-15.1563	-5.99301	-17.9439	-11.0151	-3.3255	-11.539
3335	-15.3126	-6.61994	-19.1186	-10.958	-3.99407	-12.4778
3336	-15.4703	-7.23088	-20.2742	-10.9111	-4.66255	-13.3966
3337	-15.6284	-7.82364	-21.4061	-10.8743	-5.32801	-14.2926
3338	-15.7859	-8.39625	-22.5097	-10.8473	-5.98754	-15.1631
3339	-15.9418	-8.94697	-23.58	-10.8298	-6.6383	-16.0052
3340	-16.095	-9.47426	-24.6119	-10.8215	-7.27753	-16.8163
3341	-16.2445	-9.97685	-25.6005	-10.822	-7.90261	-17.594
3342	-16.3893	-10.4537	-26.5406	-10.8311	-8.51109	-18.336
3343	-16.5286	-10.9042	-27.4275	-10.8483	-9.10067	-19.0401
3344	-16.6613	-11.3277	-28.2563	-10.8733	-9.66928	-19.7046
3345	-16.7865	-11.7242	-29.0225	-10.9057	-10.2151	-20.3276
3346	-16.9035	-12.0935	-29.7222	-10.9452	-10.7365	-20.9078
3347	-17.0114	-12.4361	-30.3514	-10.9915	-11.2321	-21.4442
3348	-17.1094	-12.7524	-30.907	-11.0443	-11.7009	-21.9357
3349	-17.1969	-13.0431	-31.3861	-11.1034	-12.1421	-22.3819
3350	-17.2731	-13.3093	-31.7865	-11.1685	-12.555	-22.7823
3351	-17.3374	-13.5518	-32.1064	-11.2395	-12.9394	-23.1369
3352	-17.3893	-13.772	-32.3448	-11.3162	-13.2952	-23.4458
3353	-17.4283	-13.9711	-32.5011	-11.3985	-13.6227	-23.7094
3354	-17.4538	-14.1505	-32.5753	-11.4861	-13.9221	-23.9281
3355	-17.4654	-14.3114	-32.568	-11.579	-14.1942	-24.1027
3356	-17.4628	-14.4554	-32.4804	-11.677	-14.4395	-24.2341
3357	-17.4456	-14.5838	-32.3142	-11.7801	-14.6592	-24.3232
3358	-17.4136	-14.6978	-32.0714	-11.8879	-14.8541	-24.3711
3359	-17.3665	-14.7986	-31.7547	-12.0004	-15.0255	-24.3788
3360	-17.3043	-14.8874	-31.3669	-12.1173	-15.1744	-24.3475
3361	-17.2269	-14.965	-30.9115	-12.2382	-15.302	-24.2783
3362	-17.1344	-15.0322	-30.3919	-12.3629	-15.4097	-24.1722
3363	-17.0269	-15.0897	-29.8118	-12.4909	-15.4986	-24.0304
3364	-16.9048	-15.1377	-29.1754	-12.6218	-15.5697	-23.8537
3365	-16.7684	-15.1766	-28.4865	-12.7549	-15.6242	-23.6431
3366	-16.6183	-15.2063	-27.7493	-12.8897	-15.663	-23.3992
3367	-16.4551	-15.2265	-26.9679	-13.0254	-15.6869	-23.1227
3368	-16.2797	-15.2367	-26.1464	-13.1613	-15.6966	-22.8141
3369	-16.093	-15.2364	-25.2888	-13.2965	-15.6926	-22.4736
3370	-15.8961	-15.2246	-24.399	-13.4301	-15.6753	-22.1016
3371	-15.6903	-15.2004	-23.4809	-13.5611	-15.6449	-21.698
3372	-15.4769	-15.1623	-22.5379	-13.6885	-15.6014	-21.2628
3373	-15.2574	-15.1092	-21.5737	-13.8114	-15.5447	-20.7958
3374	-15.0335	-15.0395	-20.5913	-13.9285	-15.4744	-20.2967
3375	-14.8067	-14.9516	-19.5939	-14.0389	-15.3899	-19.7652
3376	-14.5788	-14.844	-18.5843	-14.1415	-15.2908	-19.2007
3377	-14.3516	-14.7148	-17.5651	-14.2353	-15.1761	-18.6028
3378	-14.127	-14.5626	-16.5389	-14.3193	-15.045	-17.971
3379	-13.9065	-14.3857	-15.5077	-14.3926	-14.8965	-17.3048
3380	-13.6921	-14.1825	-14.4737	-14.4544	-14.7295	-16.6036
3381	-13.4854	-13.9517	-13.4386	-14.5039	-14.5428	-15.8672
3382	-13.2878	-13.692	-12.404	-14.5404	-14.3354	-15.0951
3383	-13.1009	-13.4024	-11.3716	-14.5636	-14.106	-14.2872
3384	-12.926	-13.082	-10.3424	-14.573	-13.8537	-13.4435
3385	-12.7643	-12.7302	-9.31765	-14.5684	-13.5773	-12.5639
3386	-12.6166	-12.3468	-8.29824	-14.5497	-13.2759	-11.6489
3387	-12.4839	-11.9315	-7.28495	-14.517	-12.9487	-10.699
3388	-12.3666	-11.4848	-6.27839	-14.4706	-12.595	-9.7149
3389	-12.2653	-11.0072	-5.279	-14.4108	-12.2145	-8.69762
3390	-12.1801	-10.4995	-4.28708	-14.3382	-11.8068	-7.6484
3391	-12.1112	-9.96292	-3.30278	-14.2535	-11.3719	-6.56879
3392	-12.0583	-9.39896	-2.32609	-14.1576	-10.9099	-5.46055
3393	-12.0213	-8.80937	-1.35686	-14.0514	-10.4214	-4.32576
3394	-11.9996	-8.19619	-0.394825	-13.9361	-9.90698	-3.16672
3395	-11.9928	-7.5617	0.560432	-13.813	-9.36771	-1.98602
3396	-12.0001	-6.90841	1.50942	-13.6832	-8.80479	-0.786476
3397	-12.0208	-6.239	2.45274	-13.5484	-8.21971	0.428863
3398	-12.0539	-5.55632	3.39107	-13.4098	-7.6142	1.65674
3399	-12.0987	-4.86334	4.32512	-13.2691	-6.99021	2.89369
3400	-12.154	-4.16312	5.2556	-13.1277	-6.34993	4.13612
3401	-12.219	-3.45874	6.18322	-12.9873	-5.69569	5.38025
3402	-12.2925	-2.75333	7.10862	-12.8493	-5.03001	6.62223
3403	-12.3735	-2.04996	8.03233	-12.7152	-4.35552	7.8581
3404	-12.461	-1.35167	8.95474	-12.5866	-3.67494	9.08386
3405	-12.554	-0.661365	9.87607	-12.4648	-2.99108	10.2955
3406	-12.6515	0.0181405	10.7963	-12.3511	-2.30674	11.489
3407	-12.7525	0.684205	11.7152	-12.2468	-1.62475	12.6603
3408	-12.8561	1.33436	12.6323	-12.1528	-0.947878	13.8056
3409	-12.9615	1.96635	13.5466	-12.0703	-0.278825	14.9211
3410	-13.0676	2.57813	14.4571	-12	0.379804	16.0031
3411	-13.1738	3.16789	15.3621	-11.9427	1.02553	17.0481
3412	-13.2793	3.73407	16.2599	-11.8989	1.65604	18.0527
3413	-13.3833	4.27536	17.1482	-11.8691	2.26917	19.0138
3414	-13.4851	4.79072	18.0245	-11.8534	2.86298	19.9285
3415	-13.584	5.27934	18.886	-11.8521	3.4357	20.794
3416	-13.6793	5.74068	19.7296	-11.865	3.9858	21.608
3417	-13.7702	6.17444	20.5518	-11.892	4.51197	22.3683
3418	-13.8562	6.58055	21.3491	-11.9326	5.01312	23.0729
3419	-13.9363	6.95915	22.1176	-11.9864	5.48839	23.7202
3420	-14.01	7.3106	22.8536	-12.0526	5.93715	24.3088
3421	-14.0764	7.63542	23.5531	-12.1306	6.35896	24.8378
3422	-14.1346	7.93431	24.2121	-12.2193	6.75359	25.3062
3423	-14.1839	8.20809	24.8265	-12.3178	7.12103	25.7135
3424	-14.2233	8.45769	25.3926	-12.4249	7.46141	26.0596
3425	-14.252	8.68412	25.9066	-12.5393	7.77504	26.3443
3426	-14.2691	8.88847	26.3648	-12.6597	8.06236	26.568
3427	-14.2736	9.07181	26.7639	-12.7847	8.32392	26.731
3428	-14.2647	9.23524	27.1007	-12.9128	8.5604	26.8342
3429	-14.2415	9.37981	27.3723	-13.0426	8.77253	26.8783
3430	-14.2033	9.50651	27.576	-13.1724	8.9611	26.8646
3431	-14.1493	9.61626	27.7095	-13.3007	9.12693	26.7942
3432	-14.0791	9.70984	27.7708	-13.4261	9.27087	26.6686
3433	-13.9922	9.78791	27.7581	-13.5469	9.39374	26.4893
3434	-13.8883	9.85097	27.6701	-13.6616	9.49634	26.258
3435	-13.7673	9.89937	27.5056	-13.7688	9.57942	25.9764
3436	-13.6295	9.93325	27.2638	-13.8671	9.64366	25.6465
3437	-13.4752	9.95258	26.9441	-13.9552	9.68967	25.27
3438	-13.3051	9.95713	26.5463	-14.0319	9.71796	24.8489
3439	-13.12	9.94648	26.0701	-14.0961	9.72892	24.3851
3440	-12.9213	9.92002	25.5159	-14.1468	9.72285	23.8806
3441	-12.7103	9.87698	24.8839	-14.1831	9.69991	23.3372
3442	-12.4888	9.81641	24.1747	-14.2044	9.66016	22.757
3443	-12.2589	9.73724	23.389	-14.2102	9.60349	22.1416
3444	-12.0228	9.63827	22.5275	-14.1999	9.52972	21.4929
3445	-11.7829	9.51821	21.5914	-14.1735	9.43851	20.8126
3446	-11.5421	9.37573	20.5818	-14.1309	9.32942	20.1023
3447	-11.3032	9.20946	19.5	-14.0723	9.20192	19.3635
3448	-11.0691	9.01805	18.3473	-13.9979	9.05538	18.5976
3449	-10.8429	8.8002	17.1256	-13.9082	8.88909	17.806
3450	-10.6278	8.55468	15.8365	-13.8039	8.70231	16.99
3451	-10.4268	8.28042	14.4823	-13.6858	8.49423	16.1506
3452	-10.2428	7.97646	13.0651	-13.5548	8.26406	15.2891
3453	-10.0789	7.64207	11.5876	-13.4121	8.011	14.4063
3454	-9.93752	7.27672	10.0527	-13.2588	7.73428	13.5033
3455	-9.82124	6.88012	8.46378	-13.0964	7.43321	12.5809
3456	-9.73218	6.45228	6.82445	-12.9261	7.10715	11.6399
3457	-9.67216	5.99348	5.1388	-12.7496	6.7556	10.6813
3458	-9.64261	5.50428	3.41137	-12.5682	6.37818	9.70594
3459	-9.64459	4.98558	1.64712	-12.3837	5.97464	8.71465
3460	-9.67875	4.43857	-0.148523	-12.1975	5.54494	7.70839
3461	-9.74529	3.86473	-1.9697	-12.0112	5.08922	6.68818
3462	-9.84399	3.26585	-3.81014	-11.8263	4.6078	5.65513
3463	-9.97421	2.64398	-5.66317	-11.6444	4.10127	4.61045
3464	-10.1349	2.00143	-7.52178	-11.4667	3.57041	3.55549
3465	-10.3247	1.34073	-9.37865	-11.2946	3.01626	2.49174
3466	-10.5417	0.66461	-11.2262	-11.1292	2.44007	1.42085
3467	-10.7839	-0.0240344	-13.0568	-10.9717	1.84335	0.344633
3468	-11.049	-0.722184	-14.8626	-10.8229	1.22782	-0.734937
3469	-11.3344	-1.42673	-16.6359	-10.6838	0.595423	-1.81571
3470	-11.6374	-2.1345	-18.3688	-10.5549	-0.0516938	-2.89536
3471	-11.9551	-2.84232	-20.0538	-10.4367	-0.711208	-3.97142
3472	-12.2846	-3.54704	-21.6835	-10.3297	-1.38063	-5.04127
3473	-12.623	-4.24556	-23.251	-10.2341	-2.05735	-6.10218
3474	-12.9674	-4.93488	-24.7496	-10.15	-2.73863	-7.15129
3475	-13.3148	-5.61214	-26.1731	-10.0773	-3.42166	-8.18567
3476	-13.6626	-6.27464	-27.5158	-10.0161	-4.10361	-9.20233
3477	-14.0081	-6.91984	-28.7725	-9.9659	-4.7816	-10.1983

## Sheet: Participants 3
Row data
	Video camera-type kayak motion capture system			Optical motion capture system
Frame	Tilt	Turn	Rotation	Tilt	Turn	Rotation
2280	-3.83361	-14.474	-23.7392	-2.03629	-16.3699	-22.7208
2281	-3.74798	-14.5157	-23.2472	-2.12947	-16.3754	-22.1547
2282	-3.64277	-14.5411	-22.6852	-2.22557	-16.3639	-21.5335
2283	-3.51907	-14.5494	-22.0526	-2.32348	-16.335	-20.8583
2284	-3.37825	-14.5396	-21.3495	-2.42203	-16.2881	-20.1304
2285	-3.22199	-14.5107	-20.5766	-2.52006	-16.2227	-19.3513
2286	-3.05224	-14.462	-19.7348	-2.6164	-16.1382	-18.5229
2287	-2.87121	-14.3925	-18.826	-2.70994	-16.034	-17.6473
2288	-2.6813	-14.3014	-17.8523	-2.79961	-15.9092	-16.7268
2289	-2.48512	-14.188	-16.8163	-2.88441	-15.7633	-15.7641
2290	-2.2854	-14.0517	-15.7211	-2.96346	-15.5955	-14.762
2291	-2.08495	-13.892	-14.5703	-3.03595	-15.4052	-13.7237
2292	-1.88661	-13.7084	-13.3678	-3.10121	-15.1917	-12.6523
2293	-1.6932	-13.5009	-12.1177	-3.15869	-14.9544	-11.5515
2294	-1.50745	-13.2691	-10.8248	-3.20797	-14.6929	-10.4247
2295	-1.33196	-13.0132	-9.49389	-3.24875	-14.4069	-9.27579
2296	-1.16911	-12.7333	-8.12998	-3.28088	-14.0962	-8.10851
2297	-1.02107	-12.4298	-6.73836	-3.30433	-13.7606	-6.92675
2298	-0.889714	-12.1033	-5.32446	-3.31917	-13.4002	-5.73439
2299	-0.77658	-11.7544	-3.89382	-3.32561	-13.0154	-4.5353
2300	-0.682862	-11.3839	-2.45203	-3.32395	-12.6066	-3.33328
2301	-0.609377	-10.993	-1.00474	-3.31456	-12.1745	-2.13206
2302	-0.556558	-10.5827	0.442436	-3.29792	-11.72	-0.935219
2303	-0.52445	-10.1544	1.88391	-3.27455	-11.2442	0.253787
2304	-0.512718	-9.70956	3.3142	-3.24502	-10.7485	1.43169
2305	-0.520667	-9.2497	4.72795	-3.20995	-10.2343	2.59542
2306	-0.547266	-8.77655	6.11999	-3.16994	-9.70336	3.74212
2307	-0.591184	-8.2919	7.48537	-3.12565	-9.15766	4.86917
2308	-0.650829	-7.79762	8.81938	-3.0777	-8.59926	5.97417
2309	-0.724392	-7.29566	10.1176	-3.0267	-8.03038	7.05499
2310	-0.8099	-6.788	11.3761	-2.97324	-7.45341	8.1097
2311	-0.905263	-6.27666	12.591	-2.91788	-6.8708	9.13664
2312	-1.00833	-5.76366	13.7592	-2.86113	-6.2851	10.1344
2313	-1.11692	-5.25099	14.8777	-2.80347	-5.6989	11.1016
2314	-1.22892	-4.74064	15.9442	-2.74533	-5.11482	12.0373
2315	-1.34226	-4.2345	16.9566	-2.68709	-4.53542	12.9406
2316	-1.455	-3.73441	17.9135	-2.62909	-3.96326	13.8108
2317	-1.56535	-3.24212	18.8139	-2.57163	-3.4008	14.6472
2318	-1.67169	-2.75927	19.657	-2.51496	-2.85039	15.4493
2319	-1.77261	-2.28736	20.4427	-2.45931	-2.31424	16.2167
2320	-1.86691	-1.82777	21.1712	-2.40486	-1.79442	16.949
2321	-1.95358	-1.38173	21.8429	-2.35179	-1.2928	17.6457
2322	-2.03186	-0.950352	22.4587	-2.30025	-0.811053	18.3066
2323	-2.10118	-0.534561	23.0195	-2.25037	-0.350645	18.9311
2324	-2.16117	-0.135159	23.5268	-2.20228	0.0871897	19.5189
2325	-2.21167	0.247202	23.9817	-2.1561	0.501443	20.0695
2326	-2.25264	0.612002	24.3857	-2.11197	0.891339	20.5823
2327	-2.28423	0.958845	24.7403	-2.07001	1.25633	21.0566
2328	-2.30668	1.28744	25.0468	-2.03036	1.59609	21.4919
2329	-2.32033	1.59761	25.3065	-1.99315	1.91049	21.8872
2330	-2.32561	1.88923	25.5206	-1.95854	2.19962	22.2418
2331	-2.32297	2.16226	25.6899	-1.92669	2.46372	22.5548
2332	-2.31292	2.41668	25.8153	-1.89774	2.7032	22.8252
2333	-2.29595	2.65252	25.897	-1.87187	2.91857	23.0521
2334	-2.27255	2.86979	25.9354	-1.84922	3.11049	23.2344
2335	-2.2432	3.0685	25.9304	-1.82995	3.27966	23.3711
2336	-2.20834	3.24863	25.8815	-1.8142	3.42685	23.4613
2337	-2.16836	3.41013	25.7883	-1.8021	3.55285	23.504
2338	-2.12364	3.55289	25.6498	-1.79375	3.65845	23.4983
2339	-2.07449	3.67673	25.465	-1.78923	3.74441	23.4433
2340	-2.02121	3.78141	25.2327	-1.78861	3.81146	23.3384
2341	-1.96403	3.86664	24.9516	-1.7919	3.86024	23.183
2342	-1.90319	3.93204	24.6203	-1.79909	3.89132	22.9766
2343	-1.8389	3.97718	24.2374	-1.81014	3.90519	22.7189
2344	-1.77135	4.00158	23.8017	-1.82496	3.9022	22.4099
2345	-1.70076	4.00471	23.3117	-1.84341	3.88262	22.0495
2346	-1.62734	3.98602	22.7666	-1.86535	3.84659	21.6381
2347	-1.55134	3.94493	22.1655	-1.89055	3.79412	21.1762
2348	-1.47302	3.88091	21.5079	-1.91879	3.72514	20.6644
2349	-1.39271	3.79341	20.7936	-1.94978	3.63946	20.1037
2350	-1.31075	3.68196	20.0229	-1.98322	3.53679	19.4952
2351	-1.22758	3.54615	19.1963	-2.01877	3.41678	18.8404
2352	-1.14364	3.38568	18.315	-2.05606	3.279	18.1409
2353	-1.05947	3.20034	17.3806	-2.09472	3.12299	17.3984
2354	-0.97564	2.99006	16.3952	-2.13435	2.94824	16.6151
2355	-0.892784	2.75494	15.3615	-2.17455	2.75427	15.7931
2356	-0.811577	2.49521	14.2826	-2.21489	2.54058	14.9348
2357	-0.732733	2.21128	13.1621	-2.25498	2.30673	14.0428
2358	-0.656996	1.90377	12.004	-2.2944	2.05233	13.1197
2359	-0.585129	1.57343	10.8129	-2.33276	1.77707	12.1685
2360	-0.5179	1.22123	9.59363	-2.36968	1.48073	11.192
2361	-0.456065	0.848295	8.35127	-2.40478	1.16323	10.1931
2362	-0.40036	0.455909	7.09123	-2.43773	0.824579	9.17498
2363	-0.351477	0.0455075	5.81904	-2.46822	0.464969	8.14056
2364	-0.310052	-0.381345	4.54029	-2.49595	0.0847272	7.0929
2365	-0.276651	-0.822976	3.26057	-2.52068	-0.315653	6.03501
2366	-0.251747	-1.27763	1.98538	-2.54217	-0.735511	4.96984
2367	-0.235718	-1.74348	0.720013	-2.56024	-1.17402	3.90024
2368	-0.228824	-2.21868	-0.530469	-2.57474	-1.63017	2.82902
2369	-0.231205	-2.70137	-1.76135	-2.58554	-2.10281	1.75884
2370	-0.242869	-3.18968	-2.9683	-2.59256	-2.59063	0.692259
2371	-0.263694	-3.68182	-4.14745	-2.59575	-3.09214	-0.368283
2372	-0.293423	-4.17601	-5.2954	-2.59508	-3.60575	-1.42049
2373	-0.331669	-4.67058	-6.40926	-2.59057	-4.12975	-2.46218
2374	-0.377922	-5.16393	-7.48668	-2.58225	-4.6623	-3.49131
2375	-0.431557	-5.65458	-8.52582	-2.5702	-5.20149	-4.50596
2376	-0.491849	-6.14115	-9.52532	-2.55449	-5.74536	-5.50431
2377	-0.557985	-6.62236	-10.4843	-2.53525	-6.29188	-6.48464
2378	-0.629083	-7.09706	-11.4024	-2.51261	-6.839	-7.44529
2379	-0.704207	-7.5642	-12.2794	-2.48674	-7.3847	-8.38471
2380	-0.782388	-8.02286	-13.1156	-2.45783	-7.92693	-9.30135
2381	-0.862637	-8.47218	-13.9114	-2.42609	-8.46371	-10.1937
2382	-0.943969	-8.91142	-14.6675	-2.39175	-8.99311	-11.0603
2383	-1.02541	-9.33989	-15.3844	-2.35507	-9.51327	-11.8995
2384	-1.10601	-9.75697	-16.0628	-2.31635	-10.0224	-12.7099
2385	-1.18488	-10.1621	-16.7033	-2.2759	-10.5189	-13.4899
2386	-1.26114	-10.5547	-17.3063	-2.23407	-11.0012	-14.2379
2387	-1.33401	-10.9343	-17.8719	-2.19124	-11.4678	-14.9521
2388	-1.40273	-11.3004	-18.4	-2.14781	-11.9176	-15.6308
2389	-1.46663	-11.6525	-18.8901	-2.10422	-12.3492	-16.2722
2390	-1.52508	-11.99	-19.3415	-2.06093	-12.7617	-16.8745
2391	-1.57753	-12.3123	-19.7531	-2.01843	-13.1541	-17.4356
2392	-1.62348	-12.619	-20.1231	-1.97723	-13.5258	-17.9537
2393	-1.66248	-12.9094	-20.4498	-1.93783	-13.876	-18.4266
2394	-1.69414	-13.1828	-20.7309	-1.90077	-14.2043	-18.8525
2395	-1.71812	-13.4386	-20.9638	-1.86657	-14.5101	-19.2294
2396	-1.73414	-13.6759	-21.1457	-1.83573	-14.7931	-19.5551
2397	-1.74194	-13.8941	-21.2736	-1.80874	-15.053	-19.828
2398	-1.74133	-14.0924	-21.3444	-1.78606	-15.2897	-20.0461
2399	-1.73215	-14.2699	-21.3547	-1.7681	-15.5029	-20.2077
2400	-1.71433	-14.4257	-21.3014	-1.75521	-15.6925	-20.3112
2401	-1.68781	-14.5591	-21.1813	-1.74769	-15.8584	-20.3553
2402	-1.65261	-14.6691	-20.9915	-1.74576	-16.0005	-20.3387
2403	-1.60884	-14.755	-20.7292	-1.74957	-16.1186	-20.2605
2404	-1.55667	-14.8159	-20.392	-1.75916	-16.2126	-20.1198
2405	-1.49637	-14.851	-19.9779	-1.77451	-16.2824	-19.9161
2406	-1.42828	-14.8596	-19.4854	-1.79549	-16.3277	-19.6493
2407	-1.3529	-14.8411	-18.9134	-1.8219	-16.3484	-19.3195
2408	-1.2708	-14.7947	-18.2614	-1.85342	-16.3441	-18.9269
2409	-1.18271	-14.7202	-17.5298	-1.88969	-16.3146	-18.4724
2410	-1.08947	-14.6169	-16.7193	-1.93023	-16.2595	-17.957
2411	-0.992044	-14.4848	-15.8315	-1.97454	-16.1784	-17.3821
2412	-0.891557	-14.3236	-14.8686	-2.02203	-16.071	-16.7494
2413	-0.789239	-14.1333	-13.8336	-2.07208	-15.9368	-16.061
2414	-0.686443	-13.9142	-12.7301	-2.12406	-15.7754	-15.3193
2415	-0.584627	-13.6664	-11.5626	-2.17728	-15.5866	-14.5269
2416	-0.485337	-13.3905	-10.336	-2.23109	-15.3698	-13.6868
2417	-0.390182	-13.0871	-9.05598	-2.28482	-15.1248	-12.8024
2418	-0.300811	-12.757	-7.72865	-2.33785	-14.8513	-11.8771
2419	-0.218884	-12.4012	-6.36071	-2.38957	-14.5493	-10.9147
2420	-0.146037	-12.0207	-4.95922	-2.43942	-14.2186	-9.91904
2421	-0.0838508	-11.6169	-3.5316	-2.48693	-13.8594	-8.89427
2422	-0.0338157	-11.1913	-2.08548	-2.53164	-13.4719	-7.84453
2423	0.00270296	-10.7452	-0.62865	-2.5732	-13.0565	-6.77408
2424	0.0244976	-10.2805	0.831041	-2.61131	-12.6137	-5.6872
2425	0.0305482	-9.79881	2.28581	-2.64577	-12.1443	-4.58814
2426	0.0200489	-9.30207	3.72802	-2.67643	-11.6491	-3.48111
2427	-0.0075705	-8.79217	5.15027	-2.70324	-11.1295	-2.37023
2428	-0.0526288	-8.27111	6.5455	-2.72622	-10.5866	-1.25946
2429	-0.115183	-7.74088	7.90707	-2.74543	-10.0221	-0.152608
2430	-0.195027	-7.20353	9.22882	-2.76102	-9.43768	0.946722
2431	-0.291693	-6.66108	10.5051	-2.7732	-8.83532	2.03516
2432	-0.404461	-6.11557	11.731	-2.78219	-8.21713	3.10957
2433	-0.532379	-5.56899	12.9021	-2.78829	-7.58542	4.16708
2434	-0.674281	-5.02331	14.0148	-2.7918	-6.94264	5.20511
2435	-0.828813	-4.48043	15.066	-2.79303	-6.29139	6.22133
2436	-0.994466	-3.94221	16.0536	-2.79233	-5.63437	7.21368
2437	-1.16961	-3.41043	16.9758	-2.79002	-4.97436	8.18035
2438	-1.3525	-2.88678	17.8319	-2.78641	-4.31421	9.1198
2439	-1.54138	-2.37289	18.6216	-2.7818	-3.65681	10.0307
2440	-1.73443	-1.87028	19.3453	-2.77648	-3.00504	10.9119
2441	-1.92985	-1.38036	20.0039	-2.77068	-2.36175	11.7624
2442	-2.12588	-0.904457	20.5988	-2.7646	-1.72975	12.5813
2443	-2.32081	-0.443784	21.132	-2.75843	-1.11174	13.368
2444	-2.51302	0.000560161	21.6057	-2.7523	-0.51032	14.1218
2445	-2.70098	0.427587	22.0225	-2.74629	0.0720489	14.842
2446	-2.88327	0.836419	22.3851	-2.74047	0.633079	15.528
2447	-3.0586	1.22629	22.6966	-2.73487	1.17067	16.1791
2448	-3.22577	1.59654	22.9597	-2.72947	1.68292	16.7947
2449	-3.38372	1.94662	23.1777	-2.72426	2.16815	17.3739
2450	-3.5315	2.27607	23.3531	-2.71917	2.62493	17.916
2451	-3.66826	2.58452	23.4888	-2.71415	3.05205	18.4198
2452	-3.79326	2.8717	23.5871	-2.70911	3.44854	18.8843
2453	-3.90583	3.13739	23.6501	-2.70398	3.81369	19.3084
2454	-4.0054	3.38143	23.6795	-2.69867	4.14701	19.6906
2455	-4.09145	3.60374	23.6766	-2.6931	4.44823	20.0296
2456	-4.16353	3.80425	23.6423	-2.6872	4.71731	20.3239
2457	-4.22124	3.98291	23.5768	-2.68091	4.95438	20.5717
2458	-4.26424	4.13971	23.4802	-2.67417	5.15976	20.7716
2459	-4.2922	4.27461	23.3518	-2.66694	5.33392	20.9218
2460	-4.30489	4.38757	23.1906	-2.65921	5.47745	21.0207
2461	-4.30208	4.47854	22.9952	-2.65096	5.59102	21.0665
2462	-4.28362	4.54742	22.7637	-2.64219	5.6754	21.0578
2463	-4.24942	4.59408	22.4941	-2.63291	5.7314	20.9932
2464	-4.19946	4.61837	22.184	-2.62314	5.75983	20.8711
2465	-4.13381	4.62007	21.8308	-2.61291	5.76152	20.6906
2466	-4.05263	4.59896	21.4319	-2.60225	5.73726	20.4506
2467	-3.95619	4.55476	20.9847	-2.59122	5.6878	20.1504
2468	-3.84487	4.48719	20.4867	-2.57983	5.61383	19.7897
2469	-3.7192	4.39595	19.9357	-2.56815	5.51597	19.3681
2470	-3.57984	4.28076	19.3296	-2.5562	5.39476	18.8859
2471	-3.42758	4.14136	18.6668	-2.54405	5.25064	18.3435
2472	-3.26339	3.97752	17.9461	-2.53172	5.084	17.7418
2473	-3.08836	3.7891	17.1669	-2.51925	4.89511	17.0819
2474	-2.90373	3.57603	16.3293	-2.50671	4.68421	16.3654
2475	-2.71091	3.33834	15.4338	-2.49411	4.45145	15.5941
2476	-2.5114	3.07621	14.4818	-2.48153	4.19692	14.7702
2477	-2.30684	2.78993	13.4755	-2.46899	3.92072	13.8963
2478	-2.09897	2.47998	12.4176	-2.45656	3.62289	12.9753
2479	-1.88961	2.14699	11.3116	-2.4443	3.30349	12.0103
2480	-1.68062	1.79176	10.1618	-2.43227	2.96262	11.0047
2481	-1.47392	1.41528	8.97303	-2.42053	2.60039	9.96227
2482	-1.27142	1.01871	7.75072	-2.40918	2.21699	8.88675
2483	-1.07501	0.603379	6.50081	-2.39828	1.81268	7.7822
2484	-0.886519	0.170768	5.22963	-2.38792	1.38783	6.65275
2485	-0.707722	-0.277505	3.94385	-2.37818	0.942887	5.50261
2486	-0.540268	-0.739704	2.65026	-2.36916	0.478444	4.33604
2487	-0.385679	-1.21401	1.35575	-2.36093	-0.00478786	3.15729
2488	-0.245323	-1.69852	0.0671216	-2.35357	-0.505962	1.97054
2489	-0.120393	-2.19134	-1.20901	-2.34715	-1.02409	0.779904
2490	-0.0118909	-2.69052	-2.46637	-2.34171	-1.55806	-0.410642
2491	0.0793841	-3.19418	-3.6991	-2.33729	-2.10659	-1.59729
2492	0.152843	-3.70047	-4.90192	-2.33391	-2.66831	-2.77641
2493	0.208107	-4.20764	-6.07015	-2.33156	-3.2417	-3.94461
2494	0.245009	-4.71402	-7.19986	-2.33021	-3.82512	-5.09875
2495	0.263583	-5.21808	-8.28788	-2.3298	-4.41685	-6.23592
2496	0.264054	-5.71843	-9.33185	-2.33024	-5.01508	-7.3535
2497	0.24682	-6.21381	-10.3303	-2.33142	-5.6179	-8.44915
2498	0.21244	-6.70311	-11.2824	-2.33321	-6.22337	-9.52079
2499	0.161607	-7.18539	-12.1883	-2.33545	-6.82951	-10.5666
2500	0.0951326	-7.65983	-13.0489	-2.33796	-7.43431	-11.5851
2501	0.0139206	-8.12575	-13.8657	-2.34056	-8.03576	-12.5749
2502	-0.0810498	-8.5826	-14.6407	-2.34305	-8.63188	-13.535
2503	-0.188744	-9.02994	-15.3766	-2.34523	-9.22069	-14.4643
2504	-0.308091	-9.46742	-16.0763	-2.34694	-9.8003	-15.3623
2505	-0.437991	-9.89477	-16.743	-2.34799	-10.3689	-16.2282
2506	-0.577335	-10.3118	-17.3801	-2.34826	-10.9246	-17.0616
2507	-0.725005	-10.7182	-17.991	-2.34762	-11.4659	-17.8621
2508	-0.879881	-11.114	-18.5788	-2.34603	-11.9911	-18.6291
2509	-1.04084	-11.4989	-19.1466	-2.34347	-12.4989	-19.3623
2510	-1.20677	-11.8729	-19.697	-2.33997	-12.9879	-20.0613
2511	-1.37654	-12.2357	-20.2323	-2.33564	-13.457	-20.7257
2512	-1.54902	-12.5872	-20.754	-2.33063	-13.9051	-21.3547
2513	-1.72305	-12.9271	-21.2633	-2.32518	-14.3314	-21.9478
2514	-1.89746	-13.2552	-21.7606	-2.31956	-14.7351	-22.5043
2515	-2.07108	-13.5711	-22.2456	-2.3141	-15.1156	-23.0233
2516	-2.24266	-13.8747	-22.7174	-2.3092	-15.4725	-23.5038
2517	-2.41095	-14.1653	-23.1743	-2.30528	-15.8054	-23.9447
2518	-2.57467	-14.4427	-23.614	-2.3028	-16.1142	-24.3447
2519	-2.73251	-14.7063	-24.0336	-2.30222	-16.3988	-24.7026
2520	-2.88312	-14.9556	-24.4295	-2.30401	-16.6592	-25.0169
2521	-3.02514	-15.1901	-24.7976	-2.30863	-16.8955	-25.286
2522	-3.15723	-15.4091	-25.1334	-2.31651	-17.108	-25.5084
2523	-3.27803	-15.6121	-25.4321	-2.32803	-17.2969	-25.6825
2524	-3.38622	-15.7984	-25.6886	-2.34351	-17.4626	-25.8066
2525	-3.48055	-15.9673	-25.8975	-2.36322	-17.6054	-25.8791
2526	-3.55981	-16.1182	-26.0536	-2.3873	-17.7256	-25.8984
2527	-3.62292	-16.2504	-26.1517	-2.41584	-17.8237	-25.8628
2528	-3.66891	-16.3631	-26.1865	-2.4488	-17.8999	-25.7711
2529	-3.69696	-16.4556	-26.1533	-2.48604	-17.9547	-25.6219
2530	-3.70644	-16.5273	-26.0477	-2.52732	-17.9882	-25.414
2531	-3.69691	-16.5774	-25.8656	-2.57229	-18.0008	-25.1463
2532	-3.66817	-16.6053	-25.6035	-2.6205	-17.9925	-24.8183
2533	-3.62027	-16.6103	-25.2586	-2.67139	-17.9635	-24.4292
2534	-3.55352	-16.5918	-24.8288	-2.72435	-17.9137	-23.9789
2535	-3.46849	-16.5492	-24.3125	-2.77866	-17.8432	-23.4674
2536	-3.36605	-16.4819	-23.7091	-2.83356	-17.7517	-22.8949
2537	-3.24735	-16.3895	-23.0187	-2.88827	-17.639	-22.2621
2538	-3.11383	-16.2716	-22.2421	-2.94196	-17.5049	-21.57
2539	-2.96717	-16.1278	-21.381	-2.9938	-17.349	-20.8199
2540	-2.80933	-15.9579	-20.438	-3.04297	-17.1709	-20.0134
2541	-2.64248	-15.7617	-19.4161	-3.0887	-16.9702	-19.1526
2542	-2.46898	-15.5391	-18.3194	-3.13023	-16.7463	-18.2397
2543	-2.29135	-15.29	-17.1525	-3.1669	-16.4989	-17.2775
2544	-2.11224	-15.0148	-15.9205	-3.19811	-16.2276	-16.2688
2545	-1.93436	-14.7135	-14.6291	-3.22333	-15.9318	-15.217
2546	-1.76043	-14.3866	-13.2847	-3.24215	-15.6112	-14.1255
2547	-1.59315	-14.0344	-11.8936	-3.25427	-15.2656	-12.9982
2548	-1.43515	-13.6576	-10.4628	-3.25947	-14.8947	-11.839
2549	-1.2889	-13.2568	-8.9994	-3.25767	-14.4986	-10.6521
2550	-1.1567	-12.8329	-7.51051	-3.24889	-14.0771	-9.44165
2551	-1.04061	-12.3868	-6.00336	-3.23327	-13.6306	-8.2121
2552	-0.942398	-11.9194	-4.48512	-3.21102	-13.1595	-6.96785
2553	-0.863548	-11.4319	-2.96282	-3.1825	-12.6642	-5.71331
2554	-0.805175	-10.9256	-1.44328	-3.1481	-12.1456	-4.45289
2555	-0.768035	-10.4016	0.0669422	-3.10833	-11.6045	-3.19089
2556	-0.752495	-9.86147	1.56162	-3.06374	-11.0422	-1.93154
2557	-0.758537	-9.30664	3.03489	-3.01495	-10.46	-0.678907
2558	-0.785754	-8.7387	4.48132	-2.9626	-9.85937	0.56312
2559	-0.833365	-8.15927	5.8959	-2.90736	-9.24219	1.79084
2560	-0.900232	-7.57007	7.27411	-2.84991	-8.61038	3.00076
2561	-0.984892	-6.97287	8.61189	-2.79092	-7.96606	4.18966
2562	-1.08559	-6.3695	9.90567	-2.73104	-7.31153	5.35451
2563	-1.20031	-5.76184	11.1523	-2.67092	-6.64923	6.49259
2564	-1.32683	-5.15179	12.3493	-2.61113	-5.98173	7.60138
2565	-1.46278	-4.5413	13.4944	-2.55222	-5.31169	8.67864
2566	-1.60565	-3.93233	14.5859	-2.49467	-4.64183	9.72234
2567	-1.7529	-3.32684	15.6224	-2.43889	-3.97495	10.7307
2568	-1.90195	-2.72679	16.6031	-2.38526	-3.31383	11.7021
2569	-2.05025	-2.13411	17.5274	-2.33405	-2.66126	12.6351
2570	-2.19536	-1.55072	18.3951	-2.28549	-2.01996	13.5285
2571	-2.33492	-0.978489	19.2061	-2.23973	-1.39261	14.3811
2572	-2.46673	-0.419221	19.9608	-2.19687	-0.781763	15.192
2573	-2.58879	0.12533	20.6596	-2.15693	-0.18985	15.9602
2574	-2.69927	0.65349	21.3032	-2.1199	0.380845	16.6849
2575	-2.79659	1.16366	21.8923	-2.08569	0.928216	17.3652
2576	-2.8794	1.65434	22.4278	-2.05419	1.45035	18.0003
2577	-2.94656	2.12411	22.9106	-2.02525	1.94553	18.5895
2578	-2.99719	2.57166	23.3414	-1.99868	2.41227	19.1319
2579	-3.03066	2.99575	23.7212	-1.97429	2.8493	19.6267
2580	-3.04652	3.39527	24.0506	-1.95184	3.25557	20.073
2581	-3.04456	3.76919	24.3303	-1.9311	3.63029	20.47
2582	-3.02475	4.11657	24.5606	-1.91184	3.97284	20.8168
2583	-2.98726	4.43656	24.7419	-1.89381	4.28286	21.1124
2584	-2.93238	4.72841	24.8742	-1.87678	4.56014	21.3558
2585	-2.86054	4.99144	24.9575	-1.86052	4.80471	21.5462
2586	-2.77232	5.22505	24.9912	-1.8448	5.01673	21.6827
2587	-2.66836	5.4287	24.975	-1.82943	5.19651	21.7641
2588	-2.54939	5.60195	24.9079	-1.8142	5.34451	21.7899
2589	-2.41622	5.74439	24.7891	-1.79893	5.46125	21.759
2590	-2.26971	5.85571	24.6173	-1.78347	5.54738	21.671
2591	-2.11076	5.93562	24.3913	-1.76766	5.60359	21.525
2592	-1.94032	5.98392	24.1097	-1.75138	5.63058	21.3208
2593	-1.7594	6.00047	23.7709	-1.7345	5.62911	21.0579
2594	-1.56905	5.98521	23.3734	-1.71695	5.59993	20.7363
2595	-1.37035	5.93811	22.9157	-1.69863	5.54375	20.3561
2596	-1.16447	5.85926	22.3962	-1.6795	5.46127	19.9175
2597	-0.952637	5.7488	21.8137	-1.65952	5.35316	19.4211
2598	-0.736157	5.607	21.1668	-1.63868	5.22003	18.8675
2599	-0.516427	5.43418	20.4546	-1.61697	5.06244	18.2579
2600	-0.294941	5.23081	19.6764	-1.59443	4.8809	17.5934
2601	-0.0732973	4.99745	18.8318	-1.57112	4.67587	16.8757
2602	0.146797	4.7348	17.9207	-1.5471	4.44778	16.1064
2603	0.363527	4.44369	16.9435	-1.52249	4.19701	15.2878
2604	0.574972	4.12508	15.9011	-1.49742	3.9239	14.4219
2605	0.779119	3.78009	14.7948	-1.47205	3.62882	13.5115
2606	0.973871	3.40997	13.6264	-1.44656	3.31209	12.5592
2607	1.15707	3.01613	12.3983	-1.42117	2.97407	11.5681
2608	1.32654	2.6001	11.1133	-1.39611	2.61516	10.5413
2609	1.48006	2.16357	9.77479	-1.37166	2.23576	9.48209
2610	1.61549	1.70835	8.38673	-1.34811	1.83638	8.39395
2611	1.73073	1.23634	6.95347	-1.32577	1.41757	7.28044
2612	1.82378	0.749557	5.47987	-1.30497	0.979982	6.1452
2613	1.89283	0.250097	3.97115	-1.28606	0.524355	4.99189
2614	1.93624	-0.259902	2.43291	-1.26941	0.0515374	3.82421
2615	1.95261	-0.778269	0.871042	-1.25536	-0.437508	2.64584
2616	1.94084	-1.30283	-0.708338	-1.2443	-0.941703	1.46041
2617	1.90011	-1.83144	-2.29894	-1.23659	-1.45985	0.271465
2618	1.82997	-2.36199	-3.89438	-1.23257	-1.99064	-0.917533
2619	1.73033	-2.89246	-5.48826	-1.2326	-2.53264	-2.10325
2620	1.60146	-3.42095	-7.07422	-1.23698	-3.08433	-3.28249
2621	1.44404	-3.94565	-8.64601	-1.246	-3.64408	-4.45221
2622	1.25913	-4.46493	-10.1975	-1.25993	-4.21018	-5.60953
2623	1.04815	-4.9773	-11.723	-1.27899	-4.78084	-6.75175
2624	0.812881	-5.48145	-13.2168	-1.30334	-5.35424	-7.87633
2625	0.555433	-5.97627	-14.6738	-1.33312	-5.92852	-8.98091
2626	0.278198	-6.46082	-16.0891	-1.36842	-6.50179	-10.0633
2627	-0.016183	-6.93436	-17.4582	-1.40925	-7.07217	-11.1215
2628	-0.324871	-7.39633	-18.7771	-1.45561	-7.63782	-12.1535
2629	-0.644875	-7.84636	-20.0422	-1.50741	-8.19692	-13.1576
2630	-0.973108	-8.28423	-21.2502	-1.56454	-8.74773	-14.1322
2631	-1.30644	-8.7099	-22.3985	-1.6268	-9.28859	-15.0756
2632	-1.64174	-9.12343	-23.4848	-1.69399	-9.81794	-15.9865
2633	-1.97594	-9.52502	-24.5069	-1.76584	-10.3343	-16.8632
2634	-2.30608	-9.91497	-25.4635	-1.84204	-10.8365	-17.7043
2635	-2.62933	-10.2936	-26.3531	-1.92227	-11.3232	-18.5086
2636	-2.94303	-10.6614	-27.175	-2.00614	-11.7934	-19.2745
2637	-3.24475	-11.0188	-27.9283	-2.09328	-12.2463	-20.0005
2638	-3.53226	-11.3662	-28.6125	-2.18326	-12.6811	-20.6853
2639	-3.8036	-11.704	-29.2274	-2.27567	-13.0973	-21.3272
2640	-4.05705	-12.0326	-29.7727	-2.37007	-13.4944	-21.9248
2641	-4.29114	-12.3523	-30.2482	-2.46601	-13.8723	-22.4763
2642	-4.50469	-12.6635	-30.6538	-2.56304	-14.2307	-22.9801
2643	-4.69675	-12.9662	-30.9892	-2.6607	-14.5696	-23.4346
2644	-4.86661	-13.2604	-31.2544	-2.75854	-14.8892	-23.838
2645	-5.0138	-13.5461	-31.4489	-2.8561	-15.1896	-24.1886
2646	-5.13807	-13.823	-31.5723	-2.95291	-15.471	-24.4846
2647	-5.23938	-14.0909	-31.6242	-3.04852	-15.7338	-24.7244
2648	-5.31787	-14.3492	-31.6037	-3.14245	-15.9782	-24.9064
2649	-5.37385	-14.5973	-31.5103	-3.23425	-16.2046	-25.0288
2650	-5.40779	-14.8345	-31.343	-3.32343	-16.4133	-25.0904
2651	-5.42032	-15.0598	-31.1008	-3.40953	-16.6045	-25.0897
2652	-5.41219	-15.2722	-30.7829	-3.49207	-16.7784	-25.0255
2653	-5.38428	-15.4707	-30.3881	-3.57058	-16.9352	-24.8968
2654	-5.3376	-15.654	-29.9157	-3.64458	-17.0749	-24.7029
2655	-5.27325	-15.8207	-29.3647	-3.71361	-17.1973	-24.443
2656	-5.19245	-15.9696	-28.7344	-3.77722	-17.3022	-24.1168
2657	-5.09652	-16.0991	-28.0245	-3.83495	-17.3894	-23.7242
2658	-4.98687	-16.2078	-27.2347	-3.8864	-17.4582	-23.2655
2659	-4.86501	-16.2942	-26.3651	-3.93116	-17.5082	-22.741
2660	-4.73254	-16.3569	-25.4164	-3.96887	-17.5384	-22.1516
2661	-4.59113	-16.3942	-24.3893	-3.99921	-17.548	-21.4983

## Sheet: Participants 4
Row data
	Video camera-type kayak motion capture system			Optical motion capture system
Frame	Tilt	Turn	Rotation	Tilt	Turn	Rotation
2326	-7.94471	-5.40371	-4.15641	-6.40151	-7.5778	-8.00841
2327	-8.19463	-4.67031	-2.6806	-6.40856	-6.96682	-6.77436
2328	-8.4266	-3.91143	-1.18022	-6.39585	-6.3124	-5.47129
2329	-8.6387	-3.1294	0.339659	-6.36784	-5.61339	-4.10326
2330	-8.8294	-2.32682	1.87382	-6.32929	-4.86941	-2.67541
2331	-8.99753	-1.50646	3.41692	-6.28521	-4.08093	-1.19388
2332	-9.14232	-0.671311	4.96353	-6.24064	-3.24932	0.334295
2333	-9.2634	0.175505	6.50822	-6.20053	-2.37695	1.90135
2334	-9.36084	1.03072	8.04555	-6.16955	-1.4671	3.49891
2335	-9.43508	1.89099	9.57016	-6.15192	-0.523978	5.11812
2336	-9.48695	2.75288	11.0768	-6.15124	0.447394	6.74987
2337	-9.51764	3.61296	12.5603	-6.17033	1.44127	8.3849
2338	-9.52864	4.46779	14.0157	-6.21113	2.45134	10.014
2339	-9.5217	5.31399	15.4384	-6.27461	3.47082	11.6281
2340	-9.49879	6.14827	16.8239	-6.36072	4.49269	13.2185
2341	-9.46203	6.96745	18.1679	-6.46843	5.50974	14.7769
2342	-9.41367	7.76851	19.4667	-6.59575	6.51479	16.2957
2343	-9.35595	8.54862	20.7166	-6.73984	7.50081	17.7679
2344	-9.29117	9.30514	21.9145	-6.89713	8.46099	19.1871
2345	-9.22152	10.0357	23.0574	-7.0635	9.38891	20.5479
2346	-9.14912	10.7381	24.1429	-7.23442	10.2786	21.8455
2347	-9.07595	11.4105	25.1686	-7.4052	11.1248	23.0757
2348	-9.00381	12.0512	26.1328	-7.57118	11.9227	24.2355
2349	-8.93434	12.6589	27.034	-7.72789	12.6684	25.322
2350	-8.86894	13.2324	27.8708	-7.87131	13.3588	26.3333
2351	-8.80882	13.771	28.6425	-7.99799	13.9916	27.2681
2352	-8.75499	14.2741	29.3485	-8.10523	14.5655	28.1256
2353	-8.70824	14.7412	29.9883	-8.19119	15.0801	28.9056
2354	-8.66916	15.1723	30.5619	-8.25493	15.5357	29.6085
2355	-8.63817	15.5673	31.0694	-8.29651	15.9337	30.2353
2356	-8.61556	15.9266	31.5113	-8.31688	16.2762	30.7877
2357	-8.60143	16.2503	31.888	-8.31788	16.5657	31.268
2358	-8.59582	16.5391	32.2002	-8.30207	16.8056	31.6789
2359	-8.59867	16.7934	32.449	-8.27262	16.9997	32.0241
2360	-8.60983	17.014	32.6353	-8.23306	17.1519	32.3073
2361	-8.62914	17.2015	32.7602	-8.18711	17.2665	32.533
2362	-8.65641	17.3566	32.8251	-8.13847	17.3479	32.7055
2363	-8.69142	17.48	32.8313	-8.09058	17.4004	32.8296
2364	-8.734	17.5725	32.7803	-8.0465	17.4282	32.9096
2365	-8.78396	17.6348	32.6736	-8.00874	17.4354	32.9497
2366	-8.84115	17.6674	32.5128	-7.97917	17.4255	32.9534
2367	-8.90545	17.6712	32.2995	-7.95902	17.4017	32.9238
2368	-8.97675	17.6465	32.0354	-7.94887	17.3667	32.8628
2369	-9.05498	17.594	31.7223	-7.94871	17.3226	32.7717
2370	-9.14007	17.5141	31.3618	-7.95805	17.2709	32.6507
2371	-9.23198	17.4073	30.9558	-7.97595	17.2124	32.4992
2372	-9.33063	17.2739	30.506	-8.0012	17.1475	32.3155
2373	-9.43597	17.1143	30.0141	-8.03236	17.0758	32.0974
2374	-9.5479	16.9289	29.4819	-8.06786	16.9967	31.8422
2375	-9.66629	16.7179	28.9112	-8.10605	16.9092	31.5467
2376	-9.79095	16.4816	28.3036	-8.14525	16.8118	31.2076
2377	-9.92164	16.2204	27.6609	-8.18378	16.7031	30.822
2378	-10.058	15.9347	26.9846	-8.22002	16.5816	30.3868
2379	-10.1998	15.6246	26.2763	-8.25236	16.4459	29.8999
2380	-10.3463	15.2907	25.5376	-8.27929	16.2944	29.3594
2381	-10.4971	14.9335	24.77	-8.29937	16.1259	28.7644
2382	-10.6515	14.5533	23.9747	-8.31127	15.9391	28.1146
2383	-10.8088	14.1508	23.1532	-8.31379	15.7326	27.4105
2384	-10.968	13.7266	22.3067	-8.30585	15.5053	26.6534
2385	-11.1282	13.2815	21.4363	-8.28656	15.2555	25.8453
2386	-11.2883	12.8163	20.5433	-8.25522	14.9818	24.9887
2387	-11.4473	12.3319	19.6286	-8.21132	14.682	24.0869
2388	-11.6039	11.8294	18.6932	-8.15462	14.3538	23.1432
2389	-11.7569	11.3098	17.738	-8.08513	13.9948	22.1614
2390	-11.905	10.7743	16.7641	-8.00317	13.6021	21.1452
2391	-12.0469	10.2243	15.7722	-7.90935	13.1725	20.0981
2392	-12.1811	9.661	14.7634	-7.80459	12.7032	19.0236
2393	-12.3065	9.08597	13.7384	-7.69011	12.1913	17.9245
2394	-12.4215	8.50066	12.6981	-7.56739	11.6342	16.803
2395	-12.525	7.90663	11.6437	-7.43813	11.03	15.6609
2396	-12.6155	7.30545	10.5761	-7.3042	10.3775	14.4991
2397	-12.6921	6.69874	9.49645	-7.16754	9.67637	13.3181
2398	-12.7534	6.0881	8.40596	-7.03013	8.92735	12.1175
2399	-12.7985	5.47515	7.30598	-6.89387	8.13232	10.8969
2400	-12.8263	4.86144	6.19795	-6.76055	7.29432	9.65527
2401	-12.8361	4.24853	5.08344	-6.6318	6.41755	8.39191
2402	-12.827	3.63788	3.96414	-6.50907	5.50728	7.10624
2403	-12.7985	3.03087	2.84186	-6.39362	4.56973	5.79817
2404	-12.75	2.42882	1.71854	-6.28651	3.6119	4.46835
2405	-12.6811	1.8329	0.59619	-6.18865	2.64136	3.11822
2406	-12.5915	1.24418	-0.52307	-6.10079	1.666	1.7502
2407	-12.4811	0.663608	-1.63707	-6.02357	0.693802	0.367616
2408	-12.3499	0.0919658	-2.74359	-5.95747	-0.267384	-1.02529
2409	-12.198	-0.470099	-3.8404	-5.90281	-1.2101	-2.42356
2410	-12.0255	-1.02209	-4.92527	-5.85971	-2.12744	-3.82161
2411	-11.8329	-1.56368	-5.99602	-5.82801	-3.01324	-5.2135
2412	-11.6205	-2.09466	-7.05053	-5.80713	-3.86225	-6.59308
2413	-11.389	-2.61501	-8.08675	-5.79599	-4.67015	-7.95414
2414	-11.1389	-3.12481	-9.10276	-5.79286	-5.43375	-9.29056
2415	-10.8711	-3.62428	-10.0968	-5.79521	-6.15096	-10.5964
2416	-10.5864	-4.11376	-11.0671	-5.7996	-6.82088	-11.8657
2417	-10.2859	-4.59366	-12.0123	-5.80159	-7.44381	-13.0929
2418	-9.97046	-5.06451	-12.931	-5.79573	-8.0212	-14.2723
2419	-9.64139	-5.52684	-13.822	-5.77556	-8.55565	-15.3982
2420	-9.29991	-5.98127	-14.6843	-5.73375	-9.05079	-16.4651
2421	-8.94736	-6.42839	-15.517	-5.66234	-9.51116	-17.4673
2422	-8.58517	-6.86878	-16.3194	-5.55304	-9.94202	-18.3994
2423	-8.21487	-7.30302	-17.0909	-5.39771	-10.3491	-19.256
2424	-7.83807	-7.73158	-17.8309	-5.18886	-10.7382	-20.0322
2425	-7.45646	-8.1549	-18.539	-4.92027	-11.1152	-20.724
2426	-7.07183	-8.57327	-19.2149	-4.58761	-11.4853	-21.3279
2427	-6.68604	-8.98689	-19.8581	-4.18909	-11.8528	-21.8419
2428	-6.30103	-9.39583	-20.4683	-3.72597	-12.2209	-22.2654
2429	-5.91883	-9.79997	-21.0453	-3.20305	-12.5915	-22.5995
2430	-5.54153	-10.1991	-21.5886	-2.62885	-12.9645	-22.8471
2431	-5.17132	-10.5927	-22.0978	-2.01562	-13.3383	-23.0126
2432	-4.81042	-10.9803	-22.5725	-1.3791	-13.7097	-23.1026
2433	-4.46113	-11.361	-23.012	-0.737909	-14.0739	-23.1248
2434	-4.12578	-11.734	-23.4158	-0.112782	-14.4247	-23.0885
2435	-3.80675	-12.098	-23.7832	0.474523	-14.7554	-23.0035
2436	-3.50643	-12.4519	-24.1131	1.00239	-15.0586	-22.8801
2437	-3.2272	-12.7941	-24.4049	1.45062	-15.3272	-22.7288
2438	-2.97145	-13.1231	-24.6574	1.8016	-15.5548	-22.5592
2439	-2.7415	-13.4373	-24.8695	2.04136	-15.7361	-22.3801
2440	-2.53962	-13.7347	-25.04	2.16043	-15.867	-22.1989
2441	-2.36797	-14.0136	-25.1677	2.15433	-15.9456	-22.0213
2442	-2.22859	-14.2719	-25.2513	2.02374	-15.9715	-21.8515
2443	-2.12335	-14.5077	-25.2893	1.77442	-15.9466	-21.6914
2444	-2.05395	-14.7188	-25.2804	1.41671	-15.8744	-21.5415
2445	-2.02183	-14.9032	-25.2231	0.964805	-15.76	-21.4003
2446	-2.02817	-15.059	-25.116	0.43586	-15.6099	-21.265
2447	-2.07387	-15.184	-24.9577	-0.151058	-15.4314	-21.1315
2448	-2.15948	-15.2763	-24.7469	-0.776042	-15.2322	-20.9949
2449	-2.28518	-15.334	-24.4821	-1.41938	-15.0199	-20.8497
2450	-2.45077	-15.3553	-24.1623	-2.06249	-14.8018	-20.6902
2451	-2.65561	-15.3386	-23.7861	-2.68869	-14.5842	-20.5107
2452	-2.89865	-15.2822	-23.3527	-3.28373	-14.3722	-20.3057
2453	-3.17837	-15.1846	-22.861	-3.83623	-14.1697	-20.0704
2454	-3.4928	-15.0447	-22.3104	-4.33774	-13.9788	-19.8001
2455	-3.83951	-14.8613	-21.7003	-4.78276	-13.8003	-19.4912
2456	-4.21561	-14.6334	-21.0303	-5.16849	-13.6331	-19.1403
2457	-4.6178	-14.3603	-20.3002	-5.49453	-13.4749	-18.7446
2458	-5.04235	-14.0414	-19.5101	-5.76247	-13.322	-18.3018
2459	-5.48515	-13.6765	-18.6604	-5.97541	-13.1698	-17.8098
2460	-5.9418	-13.2654	-17.7515	-6.13754	-13.0127	-17.2668
2461	-6.40758	-12.8083	-16.7845	-6.25373	-12.8442	-16.6709
2462	-6.87758	-12.3055	-15.7604	-6.32914	-12.6579	-16.0206
2463	-7.34672	-11.7578	-14.6809	-6.36896	-12.4466	-15.3142
2464	-7.80987	-11.1661	-13.5476	-6.37819	-12.2034	-14.5501
2465	-8.26189	-10.5315	-12.3629	-6.36147	-11.9213	-13.7268
2466	-8.69774	-9.85561	-11.1292	-6.32307	-11.5937	-12.8429
2467	-9.11257	-9.14008	-9.84932	-6.26688	-11.2142	-11.8972
2468	-9.50178	-8.38698	-8.52658	-6.19642	-10.7774	-10.889
2469	-9.86113	-7.59862	-7.16449	-6.11496	-10.2781	-9.81768
2470	-10.1868	-6.77758	-5.76694	-6.02559	-9.71241	-8.68335
2471	-10.4755	-5.92666	-4.33811	-5.93132	-9.0772	-7.48659
2472	-10.7245	-5.04895	-2.8825	-5.83517	-8.37065	-6.22869
2473	-10.9318	-4.14772	-1.40486	-5.7402	-7.59223	-4.91167
2474	-11.0957	-3.22644	0.0898267	-5.6495	-6.74282	-3.53833
2475	-11.2157	-2.28878	1.59637	-5.56621	-5.82475	-2.11237
2476	-11.2916	-1.33852	3.10943	-5.49345	-4.84189	-0.638348
2477	-11.3241	-0.37956	4.62354	-5.43421	-3.7995	0.878269
2478	-11.3145	0.584121	6.13317	-5.39127	-2.70423	2.43112
2479	-11.2646	1.54851	7.63279	-5.36708	-1.56391	4.013
2480	-11.1772	2.5096	9.11688	-5.36361	-0.387333	5.61591
2481	-11.055	3.46342	10.58	-5.38234	0.81593	7.23119
2482	-10.9017	4.40606	12.0169	-5.4241	2.03583	8.84964
2483	-10.721	5.33374	13.4224	-5.48905	3.2621	10.4617
2484	-10.517	6.24284	14.7916	-5.57668	4.48447	12.0575
2485	-10.294	7.12991	16.1199	-5.68578	5.69293	13.6275
2486	-10.0562	7.9917	17.4031	-5.81451	6.8779	15.1621
2487	-9.80819	8.82522	18.6371	-5.96047	8.03036	16.6524
2488	-9.5541	9.62775	19.8182	-6.12076	9.14202	18.0899
2489	-9.2981	10.3968	20.9434	-6.29209	10.2053	19.4672
2490	-9.04413	11.1303	22.0097	-6.47093	11.2135	20.7778
2491	-8.79585	11.8263	23.0148	-6.6536	12.1609	22.0162
2492	-8.55661	12.4833	23.9565	-6.83641	13.0423	23.1781
2493	-8.32944	13.1	24.8333	-7.01581	13.854	24.2605
2494	-8.11698	13.6755	25.6439	-7.18852	14.5927	25.2613
2495	-7.92151	14.2092	26.3875	-7.35163	15.2566	26.1797
2496	-7.74494	14.7007	27.0636	-7.50274	15.8446	27.0161
2497	-7.58877	15.1498	27.672	-7.64003	16.3568	27.7715
2498	-7.45418	15.5566	28.2129	-7.76232	16.7942	28.4483
2499	-7.34199	15.9216	28.6868	-7.86912	17.1589	29.0494
2500	-7.25269	16.2451	29.0943	-7.96058	17.4541	29.5785
2501	-7.18652	16.528	29.4365	-8.0375	17.6838	30.0398
2502	-7.14342	16.7711	29.7145	-8.10115	17.8528	30.4382
2503	-7.12314	16.9752	29.9297	-8.15326	17.9665	30.7785
2504	-7.1252	17.1415	30.0837	-8.19577	18.0308	31.0657
2505	-7.14899	17.2711	30.178	-8.23072	18.052	31.3046
2506	-7.19375	17.3652	30.2146	-8.26006	18.0363	31.4999
2507	-7.25861	17.4249	30.1952	-8.28553	17.99	31.6555
2508	-7.34263	17.4515	30.1219	-8.30853	17.9188	31.7747
2509	-7.4448	17.4462	29.9966	-8.33006	17.828	31.8601
2510	-7.56405	17.4102	29.8214	-8.35067	17.722	31.9132
2511	-7.6993	17.3447	29.5983	-8.37051	17.6044	31.9347
2512	-7.84944	17.2508	29.3294	-8.3894	17.4781	31.9244
2513	-8.01335	17.1297	29.0166	-8.40689	17.3448	31.8812
2514	-8.18988	16.9825	28.6621	-8.42239	17.2052	31.8033
2515	-8.37788	16.8101	28.2677	-8.43529	17.0595	31.6885
2516	-8.5762	16.6135	27.8352	-8.44506	16.9069	31.5341
2517	-8.78366	16.3937	27.3665	-8.45132	16.7464	31.3376
2518	-8.99908	16.1516	26.8632	-8.45391	16.5766	31.0963
2519	-9.22124	15.8881	26.3268	-8.45291	16.396	30.8081
2520	-9.44893	15.6038	25.759	-8.4486	16.2031	30.4714
2521	-9.6809	15.2996	25.1609	-8.44146	15.9968	30.0849
2522	-9.91586	14.9763	24.5339	-8.4321	15.7763	29.6484
2523	-10.1525	14.6345	23.8789	-8.42117	15.5412	29.1619
2524	-10.3896	14.2749	23.197	-8.40929	15.2915	28.6263
2525	-10.6257	13.8981	22.4891	-8.39697	15.0276	28.0428
2526	-10.8594	13.5049	21.7558	-8.38456	14.7502	27.4129
2527	-11.0895	13.0957	20.9978	-8.37217	14.46	26.7383
2528	-11.3146	12.6712	20.2158	-8.35966	14.1579	26.0205
2529	-11.5332	12.232	19.4101	-8.34661	13.8447	25.2609
2530	-11.7441	11.7787	18.5814	-8.33231	13.5208	24.4604
2531	-11.946	11.3118	17.73	-8.31584	13.1863	23.6198
2532	-12.1375	10.8321	16.8564	-8.29609	12.841	22.7394
2533	-12.3175	10.3401	15.9611	-8.27182	12.4838	21.8193
2534	-12.4848	9.83648	15.0447	-8.24174	12.1131	20.8592
2535	-12.6382	9.32197	14.1079	-8.20465	11.7269	19.859
2536	-12.777	8.79729	13.1513	-8.15944	11.3226	18.8185
2537	-12.9	8.26322	12.1759	-8.10526	10.8969	17.7381
2538	-13.0066	7.72061	11.1827	-8.04153	10.4466	16.6182
2539	-13.0961	7.17035	10.1729	-7.96801	9.96796	15.4601
2540	-13.1678	6.6134	9.14797	-7.88484	9.45765	14.2655
2541	-13.2214	6.05078	8.10949	-7.79251	8.91248	13.0367
2542	-13.2566	5.48359	7.05927	-7.69187	8.3298	11.7767
2543	-13.2731	4.91298	5.9993	-7.58406	7.70774	10.4891
2544	-13.271	4.34017	4.9318	-7.47048	7.04537	9.17785
2545	-13.2502	3.76644	3.85916	-7.35268	6.34285	7.8475
2546	-13.211	3.1931	2.78396	-7.2323	5.60158	6.50278
2547	-13.1536	2.62153	1.70891	-7.11099	4.82421	5.14869
2548	-13.0785	2.05309	0.636864	-6.99035	4.01462	3.79035
2549	-12.9861	1.48919	-0.429232	-6.87182	3.17787	2.43291
2550	-12.8771	0.93123	-1.48637	-6.75668	2.31999	1.08147
2551	-12.7521	0.380573	-2.53151	-6.64597	1.44785	-0.259004
2552	-12.6119	-0.161446	-3.56164	-6.54051	0.568862	-1.58374
2553	-12.4572	-0.693556	-4.57378	-6.44086	-0.309216	-2.88826
2554	-12.2889	-1.21456	-5.56506	-6.34734	-1.17858	-4.16841
2555	-12.1079	-1.72337	-6.53274	-6.26004	-2.0316	-5.42044
2556	-11.915	-2.21899	-7.47425	-6.17885	-2.86109	-6.641
2557	-11.7111	-2.70056	-8.38723	-6.10352	-3.66046	-7.82719
2558	-11.4971	-3.16738	-9.26955	-6.03364	-4.4239	-8.97648
2559	-11.2739	-3.61889	-10.1193	-5.96873	-5.14646	-10.0867
2560	-11.0423	-4.05468	-10.935	-5.90822	-5.8242	-11.1561
2561	-10.8033	-4.47453	-11.7153	-5.85152	-6.45413	-12.1828
2562	-10.5575	-4.87836	-12.4592	-5.79804	-7.03428	-13.1656
2563	-10.3058	-5.26626	-13.166	-5.74716	-7.56363	-14.1027
2564	-10.0488	-5.63849	-13.8353	-5.6983	-8.04207	-14.9929
2565	-9.78724	-5.99543	-14.4669	-5.65088	-8.47032	-15.8344
2566	-9.52174	-6.33761	-15.0609	-5.60434	-8.84989	-16.6256
2567	-9.25287	-6.66566	-15.6178	-5.55814	-9.18292	-17.3647
2568	-8.98116	-6.9803	-16.1379	-5.51171	-9.47216	-18.0501
2569	-8.70713	-7.28232	-16.622	-5.46449	-9.72084	-18.6799
2570	-8.43124	-7.57253	-17.0709	-5.41592	-9.93258	-19.2526
2571	-8.1539	-7.85179	-17.4854	-5.36538	-10.1113	-19.7669
2572	-7.87553	-8.1209	-17.8664	-5.31226	-10.2611	-20.222
2573	-7.59651	-8.38064	-18.2149	-5.25594	-10.3863	-20.6175
2574	-7.31721	-8.63172	-18.5317	-5.1958	-10.4911	-20.9536
2575	-7.03799	-8.87471	-18.8175	-5.13129	-10.5796	-21.2313
2576	-6.7592	-9.11009	-19.073	-5.0619	-10.6558	-21.4521
2577	-6.4812	-9.33818	-19.2987	-4.98732	-10.7231	-21.6184
2578	-6.20436	-9.5591	-19.495	-4.90741	-10.7848	-21.7331
2579	-5.92905	-9.7728	-19.6621	-4.82234	-10.8434	-21.7999
2580	-5.65565	-9.97903	-19.7998	-4.73263	-10.901	-21.8226
2581	-5.38458	-10.1773	-19.908	-4.63924	-10.959	-21.8056
2582	-5.11625	-10.3669	-19.9862	-4.5436	-11.0182	-21.7533
2583	-4.85111	-10.547	-20.0335	-4.44768	-11.0786	-21.6704
2584	-4.58961	-10.7163	-20.0492	-4.35395	-11.1399	-21.5612
2585	-4.33224	-10.8736	-20.032	-4.26534	-11.201	-21.4296
2586	-4.07948	-11.0173	-19.9806	-4.18522	-11.2605	-21.2794
2587	-3.83186	-11.1457	-19.8936	-4.11721	-11.3168	-21.1135
2588	-3.58987	-11.2569	-19.7692	-4.06504	-11.3679	-20.9342
2589	-3.35407	-11.3489	-19.6056	-4.03236	-11.412	-20.7433
2590	-3.12497	-11.4196	-19.4011	-4.02249	-11.447	-20.5416
2591	-2.90314	-11.4668	-19.1535	-4.03821	-11.4711	-20.3293
2592	-2.68909	-11.4883	-18.8609	-4.08152	-11.4826	-20.1058
2593	-2.48339	-11.4818	-18.5214	-4.15344	-11.4801	-19.8699
2594	-2.28655	-11.4451	-18.1331	-4.25392	-11.4622	-19.6197
2595	-2.09912	-11.3762	-17.6941	-4.38169	-11.4277	-19.3529
2596	-1.92161	-11.2729	-17.2027	-4.53433	-11.3755	-19.0665
2597	-1.75455	-11.1334	-16.6576	-4.70836	-11.3045	-18.7575
2598	-1.59845	-10.9559	-16.0574	-4.89935	-11.2135	-18.4221
2599	-1.4538	-10.7389	-15.4011	-5.10219	-11.1012	-18.0567
2600	-1.32109	-10.4812	-14.6882	-5.3113	-10.9661	-17.6572
2601	-1.20082	-10.1816	-13.9182	-5.52095	-10.8065	-17.2194
2602	-1.09344	-9.8394	-13.0912	-5.72545	-10.6203	-16.739
2603	-0.999408	-9.45417	-12.2078	-5.91939	-10.4054	-16.2116
2604	-0.919178	-9.02573	-11.2687	-6.09785	-10.1594	-15.6327
2605	-0.853171	-8.55427	-10.2754	-6.25652	-9.87981	-14.9979
2606	-0.801792	-8.04029	-9.2296	-6.39181	-9.56395	-14.3026
2607	-0.765417	-7.48462	-8.13366	-6.50091	-9.20926	-13.5428
2608	-0.74439	-6.88846	-6.99027	-6.58184	-8.81321	-12.7144
2609	-0.739013	-6.25331	-5.80261	-6.63352	-8.37335	-11.8142
2610	-0.749538	-5.58099	-4.57429	-6.6557	-7.88743	-10.8393
2611	-0.776157	-4.87362	-3.30932	-6.64905	-7.35342	-9.78783
2612	-0.818991	-4.13362	-2.01208	-6.6151	-6.7696	-8.65885
2613	-0.878082	-3.36366	-0.6873	-6.55623	-6.13467	-7.45259
2614	-0.953378	-2.56663	0.660005	-6.47566	-5.44775	-6.17054
2615	-1.04473	-1.74566	2.02458	-6.37731	-4.70856	-4.81555
2616	-1.15186	-0.904011	3.40097	-6.26572	-3.91746	-3.39187
2617	-1.27441	-0.0451184	4.78358	-6.14595	-3.07556	-1.90512
2618	-1.41185	0.827494	6.16675	-6.0233	-2.18475	-0.362245
2619	-1.56355	1.71023	7.54478	-5.90322	-1.2478	1.22863
2620	-1.72874	2.59948	8.91201	-5.79101	-0.268344	2.85832
2621	-1.90652	3.4916	10.2629	-5.69166	0.74914	4.5168
2622	-2.09588	4.38303	11.592	-5.60961	1.79936	6.19345
2623	-2.29568	5.27026	12.894	-5.5486	2.87632	7.87722
2624	-2.50468	6.14989	14.164	-5.51153	3.97339	9.55696
2625	-2.72153	7.01865	15.3973	-5.50032	5.08347	11.2216
2626	-2.94484	7.87342	16.5894	-5.51593	6.19909	12.8604
2627	-3.17314	8.71128	17.7363	-5.55827	7.31261	14.4632
2628	-3.40493	9.52949	18.8344	-5.62631	8.41629	16.0204
2629	-3.6387	10.3255	19.8802	-5.71812	9.50244	17.5236
2630	-3.87296	11.097	20.8709	-5.83099	10.5636	18.9649
2631	-4.10625	11.842	21.8041	-5.96157	11.5925	20.3378
2632	-4.33718	12.5585	22.6775	-6.10601	12.5824	21.637
2633	-4.56446	13.2448	23.4896	-6.26018	13.5269	22.8579
2634	-4.7869	13.8997	24.239	-6.41978	14.4204	23.9973
2635	-5.00345	14.5217	24.9247	-6.58058	15.2577	25.0532
2636	-5.21322	15.11	25.5464	-6.73855	16.0347	26.0244
2637	-5.41551	15.6635	26.1037	-6.89003	16.748	26.9107
2638	-5.60977	16.1816	26.5968	-7.03186	17.395	27.7131
2639	-5.7957	16.6638	27.0262	-7.16152	17.9743	28.433
2640	-5.97316	17.1096	27.3926	-7.27717	18.4853	29.0729
2641	-6.14223	17.5188	27.6971	-7.37773	18.9285	29.6359
2642	-6.30321	17.891	27.941	-7.46287	19.3053	30.1256
2643	-6.45658	18.2262	28.1257	-7.53299	19.6181	30.546
2644	-6.603	18.5244	28.253	-7.58913	19.8699	30.9018
2645	-6.7433	18.7855	28.3249	-7.63287	20.0644	31.1974
2646	-6.87844	19.0096	28.3434	-7.66622	20.206	31.4377
2647	-7.00953	19.1969	28.3107	-7.69141	20.2991	31.6273
2648	-7.13772	19.3474	28.2291	-7.71076	20.3485	31.7706
2649	-7.26427	19.4615	28.1012	-7.72651	20.3588	31.8716
2650	-7.39042	19.5393	27.9294	-7.74069	20.3347	31.9336
2651	-7.51742	19.5812	27.7163	-7.75494	20.2803	31.9594
2652	-7.64648	19.5875	27.4644	-7.77052	20.1995	31.9509
2653	-7.77872	19.5585	27.1763	-7.78817	20.0957	31.9091
2654	-7.91516	19.4947	26.8544	-7.8082	19.9719	31.8341
2655	-8.05667	19.3966	26.5013	-7.83043	19.8304	31.7252
2656	-8.20396	19.2647	26.1192	-7.85435	19.6734	31.5807
2657	-8.35756	19.0997	25.7104	-7.87912	19.5022	31.3984
2658	-8.51778	18.9022	25.2768	-7.90374	19.318	31.1754
2659	-8.68472	18.6729	24.8205	-7.92708	19.1217	30.9086
2660	-8.85825	18.4127	24.3429	-7.948	18.9137	30.5947
2661	-9.03801	18.1224	23.8455	-7.96543	18.6943	30.2308
2662	-9.2234	17.8028	23.3296	-7.97836	18.4636	29.8144
2663	-9.41362	17.4551	22.7959	-7.98595	18.2212	29.3436
2664	-9.60765	17.0802	22.2452	-7.98746	17.9669	28.8176
2665	-9.80428	16.6791	21.6777	-7.98231	17.6999	28.2367
2666	-10.0021	16.2531	21.0936	-7.97006	17.4193	27.6023
2667	-10.1997	15.8032	20.4926	-7.95039	17.1242	26.9167
2668	-10.3952	15.3306	19.8742	-7.92309	16.8132	26.1835
2669	-10.5871	14.8364	19.2377	-7.88807	16.4849	25.4068
2670	-10.7734	14.3219	18.582	-7.84532	16.1378	24.5911
2671	-10.9524	13.7883	17.9061	-7.79494	15.77	23.7413
2672	-11.1222	13.2367	17.2087	-7.73711	15.38	22.8618
2673	-11.281	12.6683	16.4881	-7.67209	14.9659	21.957
2674	-11.4271	12.0843	15.7429	-7.60023	14.526	21.0302
2675	-11.5589	11.4858	14.9716	-7.52192	14.0586	20.0841
2676	-11.6748	10.8741	14.1725	-7.43762	13.5621	19.1204
2677	-11.7735	10.2502	13.3442	-7.34781	13.0352	18.1399
2678	-11.8538	9.61527	12.4853	-7.25302	12.4767	17.1428
2679	-11.9146	8.97041	11.5946	-7.15378	11.8855	16.1282
2680	-11.9553	8.31675	10.6712	-7.05061	11.2611	15.0949
2681	-11.9751	7.65539	9.71445	-6.944	10.6034	14.0415
2682	-11.9736	6.98745	8.72402	-6.83446	9.91255	12.9662
2683	-11.9508	6.31404	7.69996	-6.7224	9.18937	11.8677
2684	-11.9067	5.6363	6.64276	-6.60825	8.43522	10.7445
2685	-11.8416	4.95536	5.55333	-6.49237	7.65207	9.59595
2686	-11.7558	4.27238	4.43308	-6.3751	6.84249	8.42188
2687	-11.6502	3.58852	3.28385	-6.25678	6.00962	7.22276
2688	-11.5254	2.90497	2.108	-6.13773	5.15714	5.99988
2689	-11.3825	2.22293	0.908344	-6.01831	4.28916	4.75529
2690	-11.2226	1.54361	-0.311861	-5.89887	3.41012	3.49185
2691	-11.0468	0.868202	-1.54892	-5.77985	2.52468	2.21316
2692	-10.8565	0.19793	-2.79875	-5.66173	1.63757	0.923538
2693	-10.6529	-0.466006	-4.05694	-5.54503	0.753464	-0.372124
2694	-10.4375	-1.12242	-5.31878	-5.43034	-0.123141	-1.66843
2695	-10.2116	-1.77016	-6.57933	-5.31831	-0.987995	-2.95963
2696	-9.9766	-2.40808	-7.83349	-5.20959	-1.83717	-4.23972
2697	-9.73381	-3.03511	-9.07606	-5.10487	-2.66707	-5.50261
2698	-9.48454	-3.65022	-10.3018	-5.0048	-3.47445	-6.7422
2699	-9.22998	-4.25243	-11.5056	-4.91	-4.25638	-7.95253
2700	-8.9713	-4.84084	-12.6823	-4.82103	-5.01021	-9.12787
2701	-8.70955	-5.41463	-13.827	-4.73839	-5.73352	-10.2628
2702	-8.44571	-5.97303	-14.9351	-4.66246	-6.42412	-11.3521
2703	-8.18065	-6.51538	-16.0022	-4.59354	-7.08	-12.3913
2704	-7.91518	-7.04109	-17.0242	-4.5318	-7.69936	-13.3761
2705	-7.65	-7.54965	-17.9974	-4.47733	-8.28066	-14.3028
2706	-7.38572	-8.04064	-18.9186	-4.43009	-8.82265	-15.1681
2707	-7.12291	-8.51369	-19.7849	-4.38994	-9.32442	-15.9697
2708	-6.86205	-8.96851	-20.5938	-4.35665	-9.78552	-16.7053
2709	-6.6036	-9.40486	-21.3433	-4.32989	-10.206	-17.3739
2710	-6.34797	-9.82255	-22.0318	-4.30926	-10.5865	-17.9748
2711	-6.09558	-10.2214	-22.6582	-4.29427	-10.9282	-18.5081
2712	-5.84684	-10.6013	-23.2216	-4.28441	-11.2328	-18.9746
2713	-5.6022	-10.9621	-23.7216	-4.27912	-11.5026	-19.376
2714	-5.36213	-11.3036	-24.1581	-4.27788	-11.7404	-19.7144
2715	-5.1272	-11.6257	-24.5312	-4.28022	-11.9491	-19.9928
2716	-4.89804	-11.9282	-24.8415	-4.28579	-12.132	-20.2146
2717	-4.67537	-12.2109	-25.0896	-4.29443	-12.2923	-20.3837
2718	-4.46002	-12.4733	-25.2762	-4.3062	-12.4331	-20.5042
2719	-4.25294	-12.7153	-25.4023	-4.32149	-12.557	-20.5807
2720	-4.05519	-12.9362	-25.469	-4.34103	-12.6665	-20.6176
2721	-3.86797	-13.1357	-25.4773	-4.36592	-12.7634	-20.6193
2722	-3.69259	-13.3132	-25.4283	-4.39763	-12.8488	-20.5901
2723	-3.53045	-13.468	-25.3232	-4.43797	-12.9234	-20.5338
2724	-3.38309	-13.5994	-25.1628	-4.48899	-12.9874	-20.4539
2725	-3.25208	-13.7067	-24.9484	-4.55289	-13.0403	-20.3535
2726	-3.1391	-13.789	-24.6806	-4.63186	-13.0815	-20.2349
2727	-3.04583	-13.8454	-24.3604	-4.72792	-13.1099	-20.0999
2728	-2.97397	-13.8752	-23.9884	-4.84277	-13.1244	-19.95
2729	-2.9252	-13.8774	-23.5653	-4.9776	-13.1241	-19.7857
2730	-2.90113	-13.8512	-23.0916	-5.13299	-13.1077	-19.6072
2731	-2.90329	-13.7958	-22.5678	-5.30882	-13.0747	-19.4143
2732	-2.93307	-13.7104	-21.9941	-5.50421	-13.0244	-19.2063
2733	-2.99172	-13.5943	-21.3711	-5.71759	-12.9566	-18.9819
2734	-3.08028	-13.4469	-20.699	-5.94672	-12.8712	-18.7398
2735	-3.19956	-13.2677	-19.9782	-6.18883	-12.7684	-18.4782
2736	-3.35015	-13.0564	-19.2091	-6.44075	-12.6486	-18.1951
2737	-3.53231	-12.8128	-18.3923	-6.6991	-12.5122	-17.8884
2738	-3.74603	-12.5368	-17.5283	-6.96037	-12.3596	-17.5555
2739	-3.99098	-12.2286	-16.6181	-7.22115	-12.1912	-17.1937
2740	-4.26646	-11.8884	-15.6626	-7.47812	-12.007	-16.8001
2741	-4.57144	-11.5168	-14.6631	-7.72825	-11.8068	-16.3714
2742	-4.90453	-11.1146	-13.6213	-7.96872	-11.5901	-15.904
2743	-5.26396	-10.6826	-12.5389	-8.19705	-11.3557	-15.3943
2744	-5.64758	-10.2218	-11.4183	-8.41099	-11.102	-14.8383
2745	-6.05288	-9.73377	-10.262	-8.6086	-10.8269	-14.2321
2746	-6.47695	-9.2198	-9.07316	-8.78816	-10.5277	-13.5715
2747	-6.91652	-8.68157	-7.85509	-8.94819	-10.201	-12.8527
2748	-7.36792	-8.12085	-6.61165	-9.08745	-9.8431	-12.072
2749	-7.82712	-7.53954	-5.3471	-9.20496	-9.44989	-11.2263
2750	-8.28972	-6.93961	-4.06605	-9.30003	-9.01704	-10.313
2751	-8.7509	-6.3231	-2.77354	-9.37231	-8.5402	-9.33051
2752	-9.20553	-5.69204	-1.47493	-9.42185	-8.01521	-8.27811
2753	-9.64804	-5.04847	-0.175898	-9.44912	-7.43837	-7.15633
2754	-10.0725	-4.39431	1.11759	-9.4551	-6.80665	-5.96695
2755	-10.4727	-3.73141	2.39935	-9.44123	-6.11798	-4.71314
2756	-10.8419	-3.06141	3.66303	-9.40946	-5.37145	-3.39941
2757	-11.1731	-2.38576	4.90218	-9.36216	-4.56751	-2.03161
2758	-11.4589	-1.70565	6.11031	-9.30204	-3.70813	-0.616773

## Sheet: Participants 5
Row data
	Video camera-type kayak motion capture system			Optical motion capture system
Frame	Tilt	Turn	Rotation	Tilt	Turn	Rotation
3000	-12.9469	-1.06798	2.73726	-8.96545	-0.543761	1.94363
3001	-13.1307	-1.47149	2.54992	-9.11787	-0.857265	1.65788
3002	-13.3029	-1.86395	2.36202	-9.2743	-1.18396	1.359
3003	-13.4636	-2.24504	2.17228	-9.43345	-1.52208	1.0484
3004	-13.6134	-2.61457	1.97936	-9.59405	-1.86982	0.727534
3005	-13.7529	-2.9725	1.78192	-9.75479	-2.22534	0.397891
3006	-13.8824	-3.31892	1.57859	-9.91441	-2.5868	0.0609876
3007	-14.0029	-3.65402	1.36808	-10.0717	-2.95235	-0.281653
3008	-14.1148	-3.97808	1.14916	-10.2255	-3.3202	-0.628511
3009	-14.219	-4.29145	0.92072	-10.3747	-3.68859	-0.978086
3010	-14.316	-4.59456	0.681793	-10.5183	-4.0558	-1.32891
3011	-14.4066	-4.88785	0.431583	-10.6555	-4.42023	-1.67955
3012	-14.4913	-5.17181	0.169488	-10.7855	-4.78032	-2.02863
3013	-14.5707	-5.44692	-0.10488	-10.9075	-5.13465	-2.37485
3014	-14.6452	-5.71365	-0.391684	-11.0211	-5.48186	-2.71696
3015	-14.7154	-5.97246	-0.690851	-11.1259	-5.82075	-3.05381
3016	-14.7816	-6.22376	-1.00206	-11.2214	-6.1502	-3.38433
3017	-14.844	-6.46792	-1.32477	-11.3076	-6.46922	-3.70756
3018	-14.9028	-6.70525	-1.65818	-11.3843	-6.77695	-4.02261
3019	-14.9582	-6.93601	-2.00128	-11.4516	-7.07263	-4.32871
3020	-15.0101	-7.16038	-2.35286	-11.5096	-7.35564	-4.6252
3021	-15.0586	-7.37849	-2.71148	-11.5585	-7.62548	-4.91151
3022	-15.1035	-7.5904	-3.07557	-11.5988	-7.88173	-5.18718
3023	-15.1446	-7.79609	-3.4434	-11.6306	-8.12411	-5.45186
3024	-15.1817	-7.9955	-3.8131	-11.6546	-8.35245	-5.70528
3025	-15.2145	-8.18852	-4.18275	-11.6711	-8.56664	-5.94728
3026	-15.2427	-8.37499	-4.55033	-11.6809	-8.7667	-6.17778
3027	-15.2661	-8.55472	-4.91382	-11.6845	-8.95272	-6.39681
3028	-15.284	-8.72747	-5.2712	-11.6825	-9.12486	-6.60443
3029	-15.2964	-8.89302	-5.62048	-11.6757	-9.28336	-6.80082
3030	-15.3026	-9.05111	-5.95976	-11.6646	-9.42852	-6.9862
3031	-15.3024	-9.20149	-6.28724	-11.6499	-9.56069	-7.16084
3032	-15.2954	-9.34394	-6.60124	-11.6324	-9.68028	-7.32507
3033	-15.2812	-9.47824	-6.90029	-11.6127	-9.78773	-7.47926
3034	-15.2596	-9.6042	-7.18309	-11.5915	-9.88352	-7.62381
3035	-15.2303	-9.72167	-7.44857	-11.5693	-9.96815	-7.75915
3036	-15.1931	-9.83052	-7.69591	-11.5468	-10.0421	-7.88571
3037	-15.1477	-9.93068	-7.92456	-11.5245	-10.106	-8.00396
3038	-15.0942	-10.0221	-8.13426	-11.5031	-10.1603	-8.11437
3039	-15.0324	-10.1048	-8.325	-11.4828	-10.2056	-8.21738
3040	-14.9624	-10.1789	-8.49711	-11.4643	-10.2423	-8.31345
3041	-14.8843	-10.2444	-8.65117	-11.4478	-10.2711	-8.40303
3042	-14.7981	-10.3014	-8.78806	-11.4338	-10.2924	-8.48654
3043	-14.7041	-10.3502	-8.9089	-11.4224	-10.3066	-8.56439
3044	-14.6027	-10.3909	-9.01504	-11.4141	-10.3143	-8.63695
3045	-14.494	-10.4237	-9.10805	-11.4088	-10.3157	-8.70459
3046	-14.3785	-10.4488	-9.18966	-11.4068	-10.3114	-8.76761
3047	-14.2566	-10.4664	-9.2617	-11.4081	-10.3016	-8.8263
3048	-14.1289	-10.4768	-9.32608	-11.4127	-10.2865	-8.8809
3049	-13.9958	-10.4801	-9.38474	-11.4206	-10.2665	-8.93161
3050	-13.8579	-10.4765	-9.43957	-11.4318	-10.2416	-8.97858
3051	-13.7158	-10.4661	-9.49237	-11.446	-10.212	-9.02192
3052	-13.5702	-10.4491	-9.54479	-11.4631	-10.1777	-9.06167
3053	-13.4216	-10.4254	-9.59827	-11.483	-10.1387	-9.09783
3054	-13.2708	-10.3951	-9.654	-11.5053	-10.095	-9.13031
3055	-13.1184	-10.358	-9.71285	-11.5298	-10.0464	-9.159
3056	-12.965	-10.3141	-9.77536	-11.5562	-9.99266	-9.18368
3057	-12.8114	-10.263	-9.84165	-11.5841	-9.93358	-9.20409
3058	-12.6582	-10.2046	-9.91145	-11.6132	-9.86884	-9.21987
3059	-12.5061	-10.1384	-9.98408	-11.6432	-9.79808	-9.23061
3060	-12.3558	-10.064	-10.0584	-11.6738	-9.72088	-9.2358
3061	-12.2079	-9.98094	-10.1328	-11.7045	-9.63679	-9.23486
3062	-12.0631	-9.88865	-10.2053	-11.735	-9.54535	-9.22712
3063	-11.9221	-9.78652	-10.2735	-11.7649	-9.44605	-9.21184
3064	-11.7855	-9.67391	-10.3347	-11.7941	-9.33835	-9.18821
3065	-11.6538	-9.55015	-10.3858	-11.8221	-9.22174	-9.15532
3066	-11.5278	-9.41455	-10.4236	-11.8487	-9.09568	-9.1122
3067	-11.408	-9.2664	-10.4444	-11.8736	-8.95966	-9.05783
3068	-11.295	-9.10503	-10.4446	-11.8967	-8.8132	-8.99113
3069	-11.1894	-8.92978	-10.4207	-11.9177	-8.65582	-8.91094
3070	-11.0916	-8.74003	-10.3689	-11.9366	-8.48711	-8.81611
3071	-11.0022	-8.53522	-10.2856	-11.9532	-8.3067	-8.70545
3072	-10.9215	-8.31486	-10.1676	-11.9674	-8.11429	-8.57777
3073	-10.8501	-8.07854	-10.0118	-11.9793	-7.90964	-8.43188
3074	-10.7881	-7.82598	-9.81527	-11.9888	-7.69258	-8.26662
3075	-10.7359	-7.55695	-9.57582	-11.9959	-7.46303	-8.0809
3076	-10.6937	-7.2714	-9.29152	-12.0008	-7.22099	-7.87368
3077	-10.6615	-6.96937	-8.96099	-12.0036	-6.96655	-7.64401
3078	-10.6395	-6.65104	-8.5834	-12.0043	-6.6999	-7.39106
3079	-10.6275	-6.31672	-8.15851	-12.0032	-6.42129	-7.11411
3080	-10.6253	-5.96688	-7.68669	-12.0004	-6.13111	-6.81261
3081	-10.6327	-5.60209	-7.1689	-11.9961	-5.82978	-6.48615
3082	-10.6494	-5.22307	-6.60672	-11.9905	-5.51786	-6.13454
3083	-10.6748	-4.83068	-6.00232	-11.9838	-5.19595	-5.75773
3084	-10.7084	-4.42587	-5.35843	-11.9761	-4.86475	-5.35593
3085	-10.7496	-4.00973	-4.67832	-11.9678	-4.52502	-4.92951
3086	-10.7976	-3.58342	-3.96575	-11.9589	-4.17756	-4.4791
3087	-10.8517	-3.14821	-3.22491	-11.9496	-3.82326	-4.00552
3088	-10.9109	-2.70543	-2.46036	-11.94	-3.46303	-3.5098
3089	-10.9743	-2.2565	-1.67701	-11.9304	-3.09782	-2.99321
3090	-11.0409	-1.80284	-0.879964	-11.9208	-2.7286	-2.45719
3091	-11.1098	-1.34595	-0.0745309	-11.9112	-2.35636	-1.90337
3092	-11.18	-0.887337	0.733902	-11.9018	-1.9821	-1.33357
3093	-11.2505	-0.428495	1.53993	-11.8925	-1.6068	-0.749745
3094	-11.3203	0.0290702	2.33822	-11.8835	-1.23146	-0.153991
3095	-11.3885	0.483881	3.12355	-11.8746	-0.857016	0.451489
3096	-11.4541	0.934495	3.89096	-11.8658	-0.484414	1.0644
3097	-11.5164	1.37951	4.63573	-11.8571	-0.114543	1.6824
3098	-11.5747	1.8176	5.35354	-11.8483	0.251745	2.30308
3099	-11.6281	2.24749	6.04043	-11.8395	0.613645	2.92406
3100	-11.6763	2.66799	6.69296	-11.8304	0.970408	3.54294
3101	-11.7186	3.078	7.30817	-11.8211	1.32134	4.15738
3102	-11.7547	3.47651	7.88367	-11.8113	1.66581	4.76509
3103	-11.7844	3.86262	8.41763	-11.801	2.00324	5.36389
3104	-11.8075	4.23553	8.90884	-11.79	2.33313	5.95166
3105	-11.824	4.59456	9.35667	-11.7784	2.65504	6.52645
3106	-11.8338	4.93915	9.76109	-11.7658	2.96859	7.08642
3107	-11.8371	5.26885	10.1226	-11.7524	3.27347	7.62989
3108	-11.8342	5.58331	10.4424	-11.7381	3.56942	8.15534
3109	-11.8253	5.88234	10.722	-11.7227	3.85626	8.66143
3110	-11.8109	6.16581	10.9636	-11.7063	4.13385	9.14698
3111	-11.7915	6.43376	11.1695	-11.6888	4.40212	9.61101
3112	-11.7675	6.68629	11.3426	-11.6704	4.66103	10.0527
3113	-11.7395	6.92362	11.4859	-11.6509	4.91062	10.4714
3114	-11.7081	7.14606	11.6029	-11.6306	5.15094	10.8667
3115	-11.674	7.35401	11.6969	-11.6094	5.3821	11.2383
3116	-11.6377	7.54794	11.7712	-11.5875	5.60425	11.5861
3117	-11.5998	7.72839	11.8295	-11.5649	5.81756	11.91
3118	-11.5612	7.89595	11.8749	-11.5419	6.02223	12.2103
3119	-11.5223	8.05127	11.9107	-11.5185	6.2185	12.4873
3120	-11.4837	8.19502	11.9397	-11.4948	6.40661	12.7412
3121	-11.4461	8.3279	11.9645	-11.4711	6.58684	12.9727
3122	-11.41	8.45062	11.9874	-11.4475	6.75946	13.1824
3123	-11.3758	8.5639	12.0104	-11.4241	6.92478	13.3709
3124	-11.3441	8.66843	12.035	-11.4012	7.08311	13.5388
3125	-11.3152	8.76492	12.0622	-11.3788	7.23474	13.6871
3126	-11.2895	8.854	12.0926	-11.3571	7.38	13.8165
3127	-11.2673	8.93632	12.1267	-11.3363	7.5192	13.9279
3128	-11.2488	9.01243	12.1642	-11.3165	7.65265	14.022
3129	-11.2343	9.08287	12.2047	-11.2979	7.78066	14.0997
3130	-11.2237	9.1481	12.2474	-11.2804	7.90352	14.1618
3131	-11.2172	9.20853	12.291	-11.2643	8.02153	14.2092
3132	-11.2148	9.26451	12.3344	-11.2495	8.13495	14.2426
3133	-11.2165	9.3163	12.3758	-11.2363	8.24403	14.2627
3134	-11.222	9.36411	12.4138	-11.2245	8.34901	14.2703
3135	-11.2314	9.40807	12.4463	-11.2144	8.45008	14.2661
3136	-11.2442	9.44824	12.4718	-11.2059	8.54742	14.2507
3137	-11.2603	9.4846	12.4884	-11.199	8.64117	14.2247
3138	-11.2794	9.51709	12.4944	-11.1937	8.73144	14.1886
3139	-11.3011	9.54555	12.4881	-11.1902	8.81827	14.143
3140	-11.325	9.56978	12.4682	-11.1883	8.90168	14.0884
3141	-11.3509	9.58949	12.4334	-11.188	8.98163	14.0251
3142	-11.3782	9.60435	12.3826	-11.1894	9.05803	13.9536
3143	-11.4066	9.61398	12.3149	-11.1924	9.13073	13.8742
3144	-11.4357	9.61792	12.2297	-11.197	9.19951	13.7872
3145	-11.4651	9.6157	12.1266	-11.2032	9.26411	13.693
3146	-11.4944	9.60678	12.0053	-11.2109	9.32418	13.5917
3147	-11.5233	9.59059	11.8659	-11.2202	9.37932	13.4837
3148	-11.5516	9.56652	11.7085	-11.2309	9.42907	13.369
3149	-11.5789	9.53394	11.5335	-11.2431	9.4729	13.2478
3150	-11.6051	9.49219	11.3413	-11.2566	9.51021	13.1203
3151	-11.6301	9.44061	11.1325	-11.2714	9.54036	12.9866
3152	-11.6536	9.3785	10.9076	-11.2875	9.56263	12.8467
3153	-11.6758	9.30519	10.6673	-11.3048	9.57629	12.7007
3154	-11.6967	9.21998	10.4122	-11.3232	9.58052	12.5485
3155	-11.7163	9.12222	10.143	-11.3425	9.57452	12.3902
3156	-11.7349	9.01125	9.86007	-11.3628	9.55742	12.2257
3157	-11.7526	8.88646	9.564	-11.3839	9.52835	12.0549
3158	-11.7697	8.74727	9.25509	-11.4056	9.48643	11.8776
3159	-11.7866	8.59315	8.93357	-11.4279	9.4308	11.6938
3160	-11.8035	8.42362	8.59956	-11.4507	9.3606	11.5032
3161	-11.821	8.23829	8.25302	-11.4737	9.275	11.3056
3162	-11.8392	8.03682	7.89382	-11.4968	9.17321	11.1007
3163	-11.8587	7.81897	7.52168	-11.52	9.05451	10.8883
3164	-11.8799	7.5846	7.13625	-11.543	8.91823	10.6681
3165	-11.9031	7.33366	6.73707	-11.5658	8.76377	10.4397
3166	-11.9287	7.06621	6.32365	-11.5881	8.59062	10.2029
3167	-11.9569	6.78243	5.89546	-11.6099	8.39836	9.95717
3168	-11.9881	6.4826	5.45198	-11.631	8.18671	9.70226
3169	-12.0225	6.16714	4.99271	-11.6513	7.95545	9.43782
3170	-12.0601	5.83656	4.51725	-11.6707	7.70451	9.1635
3171	-12.1011	5.49152	4.0253	-11.6892	7.43394	8.87899
3172	-12.1454	5.13277	3.5167	-11.7067	7.14392	8.58398
3173	-12.193	4.76118	2.99147	-11.723	6.83475	8.27823
3174	-12.2437	4.3777	2.44983	-11.7383	6.50686	7.96152
3175	-12.2971	3.9834	1.89224	-11.7525	6.16083	7.63369
3176	-12.3531	3.57942	1.31942	-11.7657	5.79733	7.29463
3177	-12.4112	3.16696	0.73234	-11.7778	5.41718	6.9443
3178	-12.471	2.74729	0.132269	-11.7889	5.02131	6.58273
3179	-12.532	2.32172	-0.479246	-11.7991	4.61074	6.21004
3180	-12.5937	1.89159	-1.10038	-11.8084	4.18663	5.82641
3181	-12.6556	1.45826	-1.72902	-11.8171	3.75019	5.43213
3182	-12.7171	1.02308	-2.3628	-11.8251	3.30273	5.02756
3183	-12.7776	0.587397	-2.99914	-11.8327	2.84563	4.61316
3184	-12.8368	0.152526	-3.63521	-11.8399	2.38032	4.18946
3185	-12.8941	-0.280257	-4.26804	-11.8468	1.90827	3.75709
3186	-12.9491	-0.709728	-4.8945	-11.8536	1.43101	3.31677
3187	-13.0015	-1.13472	-5.51136	-11.8604	0.950042	2.86927
3188	-13.0509	-1.55415	-6.11537	-11.8672	0.466914	2.41546
3189	-13.0972	-1.96701	-6.70326	-11.8741	-0.0168509	1.95626
3190	-13.1403	-2.37235	-7.2718	-11.8812	-0.499745	1.49264
3191	-13.1802	-2.76934	-7.81788	-11.8885	-0.980293	1.02562
3192	-13.2169	-3.15723	-8.33853	-11.8961	-1.45706	0.556254
3193	-13.2506	-3.53536	-8.83097	-11.9038	-1.92866	0.0856092
3194	-13.2817	-3.90316	-9.2927	-11.9117	-2.39378	-0.385225
3195	-13.3103	-4.26014	-9.72149	-11.9197	-2.85117	-0.855165
3196	-13.3371	-4.6059	-10.1154	-11.9276	-3.29965	-1.32314
3197	-13.3624	-4.94013	-10.4731	-11.9354	-3.73813	-1.78809
3198	-13.3869	-5.26256	-10.7932	-11.9429	-4.16562	-2.24902
3199	-13.4112	-5.57302	-11.0752	-11.9499	-4.5812	-2.70494
3200	-13.4359	-5.87138	-11.3188	-11.9562	-4.98406	-3.15493
3201	-13.4619	-6.15756	-11.5243	-11.9616	-5.37348	-3.59815
3202	-13.4897	-6.43154	-11.6924	-11.9659	-5.74886	-4.03379
3203	-13.5202	-6.69332	-11.8243	-11.969	-6.10966	-4.46114
3204	-13.554	-6.94294	-11.9215	-11.9704	-6.45547	-4.87956
3205	-13.5918	-7.18047	-11.9863	-11.9702	-6.78596	-5.28847
3206	-13.6343	-7.40598	-12.0211	-11.968	-7.10089	-5.68739
3207	-13.6821	-7.61958	-12.0289	-11.9637	-7.40011	-6.07592
3208	-13.7356	-7.82138	-12.0131	-11.9572	-7.68357	-6.45373
3209	-13.7955	-8.0115	-11.9772	-11.9483	-7.95128	-6.82056
3210	-13.862	-8.19007	-11.9252	-11.937	-8.20334	-7.17622
3211	-13.9354	-8.35721	-11.8613	-11.9232	-8.43991	-7.52061
3212	-14.016	-8.51309	-11.7897	-11.9069	-8.66122	-7.85366
3213	-14.1037	-8.65784	-11.7151	-11.8882	-8.86757	-8.17536
3214	-14.1987	-8.79165	-11.6417	-11.8671	-9.05931	-8.48578
3215	-14.3006	-8.91468	-11.5742	-11.8439	-9.23682	-8.78498
3216	-14.4092	-9.02713	-11.517	-11.8186	-9.40056	-9.07309
3217	-14.5241	-9.12923	-11.4741	-11.7915	-9.55099	-9.35025
3218	-14.6447	-9.22121	-11.4497	-11.7629	-9.68862	-9.61664
3219	-14.7704	-9.30335	-11.4474	-11.7331	-9.814	-9.87242
3220	-14.9004	-9.37593	-11.4706	-11.7025	-9.92768	-10.1178
3221	-15.0338	-9.4393	-11.5221	-11.6714	-10.0302	-10.3529
3222	-15.1695	-9.49382	-11.6043	-11.6402	-10.1222	-10.578
3223	-15.3064	-9.53989	-11.7192	-11.6094	-10.2042	-10.7933
3224	-15.4433	-9.57795	-11.868	-11.5794	-10.2769	-10.9988
3225	-15.5788	-9.60847	-12.0514	-11.5505	-10.3407	-11.1948
3226	-15.7114	-9.63195	-12.2693	-11.5233	-10.3963	-11.3814
3227	-15.8397	-9.64893	-12.5212	-11.4982	-10.4441	-11.5587
3228	-15.962	-9.65997	-12.8057	-11.4755	-10.4848	-11.7268
3229	-16.0769	-9.66564	-13.1208	-11.4556	-10.5188	-11.8858
3230	-16.1827	-9.66653	-13.4639	-11.4389	-10.5466	-12.0357
3231	-16.2776	-9.66322	-13.8316	-11.4257	-10.5685	-12.1766
3232	-16.3602	-9.6563	-14.2202	-11.4161	-10.5851	-12.3084
3233	-16.4289	-9.64632	-14.6252	-11.4103	-10.5966	-12.4312
3234	-16.482	-9.63382	-15.0419	-11.4086	-10.6033	-12.5449
3235	-16.5183	-9.61928	-15.4648	-11.4109	-10.6054	-12.6494
3236	-16.5364	-9.60313	-15.8886	-11.4173	-10.6032	-12.7447
3237	-16.5351	-9.58575	-16.3073	-11.4277	-10.5967	-12.8306
3238	-16.5135	-9.5674	-16.7152	-11.442	-10.586	-12.9071
3239	-16.4707	-9.54829	-17.1063	-11.4599	-10.5711	-12.974
3240	-16.4061	-9.52849	-17.4747	-11.4813	-10.552	-13.0311
3241	-16.3195	-9.50798	-17.8148	-11.5057	-10.5284	-13.0782
3242	-16.2107	-9.4866	-18.1213	-11.5328	-10.5003	-13.115
3243	-16.0799	-9.46408	-18.389	-11.5622	-10.4673	-13.1414
3244	-15.9276	-9.44001	-18.6135	-11.5935	-10.429	-13.157
3245	-15.7544	-9.41385	-18.7907	-11.6261	-10.3852	-13.1615
3246	-15.5613	-9.38494	-18.9172	-11.6595	-10.3354	-13.1545
3247	-15.3498	-9.35248	-18.9901	-11.6932	-10.2791	-13.1357
3248	-15.1212	-9.31558	-19.0072	-11.7266	-10.2157	-13.1047
3249	-14.8775	-9.27324	-18.9671	-11.7592	-10.1446	-13.0609
3250	-14.6206	-9.22437	-18.869	-11.7905	-10.0653	-13.004
3251	-14.3526	-9.16782	-18.7126	-11.8199	-9.97713	-12.9332
3252	-14.0761	-9.10239	-18.4985	-11.847	-9.87939	-12.8482
3253	-13.7935	-9.02688	-18.2278	-11.8713	-9.77144	-12.7482
3254	-13.5073	-8.94005	-17.902	-11.8924	-9.65261	-12.6327
3255	-13.2202	-8.84072	-17.5234	-11.91	-9.52228	-12.5009
3256	-12.9348	-8.72775	-17.0943	-11.9238	-9.37981	-12.3523
3257	-12.6538	-8.60007	-16.6179	-11.9335	-9.22461	-12.186
3258	-12.3797	-8.45672	-16.0973	-11.939	-9.05615	-12.0014
3259	-12.1149	-8.29684	-15.536	-11.9401	-8.87393	-11.7979
3260	-11.8616	-8.11973	-14.9376	-11.9369	-8.67752	-11.5746
3261	-11.6222	-7.92482	-14.3059	-11.9292	-8.46658	-11.331
3262	-11.3983	-7.71173	-13.6447	-11.9173	-8.24081	-11.0664
3263	-11.1918	-7.48025	-12.9578	-11.9013	-8.00004	-10.7802
3264	-11.004	-7.23035	-12.2491	-11.8812	-7.74415	-10.4721
3265	-10.8363	-6.96218	-11.5223	-11.8575	-7.47316	-10.1415
3266	-10.6894	-6.67609	-10.7809	-11.8305	-7.18715	-9.78814
3267	-10.5642	-6.37259	-10.0284	-11.8004	-6.88631	-9.41182
3268	-10.4609	-6.05239	-9.26823	-11.7676	-6.57096	-9.01246
3269	-10.3798	-5.71634	-8.5034	-11.7326	-6.24149	-8.5901
3270	-10.3208	-5.36544	-7.73691	-11.6957	-5.89839	-8.14497
3271	-10.2835	-5.00082	-6.97154	-11.6575	-5.54227	-7.67742
3272	-10.2673	-4.62373	-6.20986	-11.6184	-5.1738	-7.18798
3273	-10.2716	-4.2355	-5.45427	-11.5788	-4.79376	-6.67735
3274	-10.2953	-3.83754	-4.70697	-11.5391	-4.40301	-6.1464
3275	-10.3375	-3.4313	-3.97001	-11.4998	-4.00245	-5.59616
3276	-10.3968	-3.01827	-3.24524	-11.4613	-3.59309	-5.02784
3277	-10.4719	-2.59995	-2.53435	-11.4238	-3.17596	-4.4428
3278	-10.5615	-2.17782	-1.83889	-11.3879	-2.75215	-3.84255
3279	-10.6639	-1.75332	-1.16023	-11.3537	-2.32279	-3.22877
3280	-10.7776	-1.32787	-0.499635	-11.3215	-1.88904	-2.60322
3281	-10.9011	-0.902794	0.141812	-11.2915	-1.45206	-1.96779
3282	-11.0326	-0.479369	0.763148	-11.2639	-1.01304	-1.32449
3283	-11.1706	-0.0587701	1.36355	-11.2387	-0.573158	-0.675348
3284	-11.3135	0.35792	1.94232	-11.2161	-0.133588	-0.0224899
3285	-11.4597	0.769719	2.49893	-11.196	0.304514	0.631947
3286	-11.6076	1.17575	3.03295	-11.1784	0.740016	1.28581
3287	-11.7558	1.57524	3.54412	-11.1633	1.17182	1.93697
3288	-11.9029	1.96753	4.03231	-11.1505	1.59887	2.5833
3289	-12.0475	2.35204	4.49755	-11.1399	2.02014	3.22277
3290	-12.1882	2.72832	4.93999	-11.1313	2.43467	3.85339
3291	-12.324	3.09599	5.35995	-11.1244	2.84154	4.47328
3292	-12.4536	3.45476	5.75789	-11.1191	3.23991	5.08064
3293	-12.576	3.80441	6.1344	-11.1151	3.62897	5.67381
3294	-12.6904	4.14479	6.49022	-11.1122	4.00801	6.25127
3295	-12.7959	4.47582	6.82621	-11.1101	4.37635	6.81162
3296	-12.8917	4.79744	7.14336	-11.1084	4.7334	7.35364
3297	-12.9774	5.10964	7.44274	-11.107	5.07864	7.87625
3298	-13.0523	5.41246	7.72556	-11.1056	5.41161	8.37851
3299	-13.116	5.70592	7.99307	-11.104	5.73192	8.85969
3300	-13.1684	5.99009	8.24659	-11.1018	6.03927	9.31918
3301	-13.2093	6.26502	8.48748	-11.0989	6.33339	9.75656
3302	-13.2385	6.53077	8.71713	-11.0951	6.61411	10.1715
3303	-13.2563	6.7874	8.9369	-11.0902	6.88132	10.564
3304	-13.2627	7.03496	9.14815	-11.0841	7.13497	10.9339
3305	-13.258	7.27349	9.3522	-11.0766	7.37509	11.2814
3306	-13.2427	7.50303	9.55027	-11.0677	7.60176	11.6067
3307	-13.2171	7.72361	9.74352	-11.0572	7.81512	11.9104
3308	-13.1819	7.93524	9.93301	-11.0452	8.01536	12.1927
3309	-13.1376	8.13795	10.1196	-11.0315	8.20276	12.4543
3310	-13.085	8.33173	10.3042	-11.0163	8.37762	12.6959
3311	-13.0248	8.51661	10.4873	-10.9996	8.54031	12.9181
3312	-12.9579	8.6926	10.6695	-10.9813	8.69122	13.1217
3313	-12.8849	8.85972	10.851	-10.9616	8.83081	13.3075
3314	-12.8068	9.01801	11.032	-10.9406	8.95957	13.4763
3315	-12.7244	9.16751	11.2124	-10.9184	9.07803	13.629
3316	-12.6385	9.30829	11.392	-10.895	9.18674	13.7665
3317	-12.55	9.44043	11.5705	-10.8708	9.28627	13.8896
3318	-12.4595	9.56402	11.7473	-10.8457	9.37722	13.9992
3319	-12.3679	9.67919	11.9217	-10.82	9.46022	14.096
3320	-12.2758	9.78607	12.0929	-10.7939	9.53586	14.1811
3321	-12.1838	9.88482	12.26	-10.7675	9.60478	14.255
3322	-12.0924	9.97561	12.4221	-10.7411	9.66759	14.3186
3323	-12.002	10.0586	12.5778	-10.7147	9.72488	14.3727
3324	-11.9132	10.1341	12.7262	-10.6888	9.77725	14.4177
3325	-11.826	10.2021	12.866	-10.6633	9.82525	14.4545
3326	-11.7409	10.263	12.996	-10.6387	9.86939	14.4836
3327	-11.6577	10.3169	13.1151	-10.615	9.91016	14.5054
3328	-11.5768	10.364	13.2219	-10.5925	9.948	14.5205
3329	-11.4979	10.4045	13.3156	-10.5715	9.98327	14.5294
3330	-11.4212	10.4386	13.3949	-10.5521	10.0163	14.5322
3331	-11.3464	10.4663	13.459	-10.5345	10.0473	14.5295
3332	-11.2735	10.4877	13.5071	-10.519	10.0766	14.5214
3333	-11.2024	10.503	13.5384	-10.5058	10.1041	14.5081
3334	-11.1328	10.5121	13.5524	-10.495	10.1299	14.4899
3335	-11.0647	10.5149	13.5487	-10.4868	10.154	14.4667
3336	-10.9979	10.5115	13.5271	-10.4815	10.1762	14.4387
3337	-10.9325	10.5015	13.4873	-10.4792	10.1963	14.4058
3338	-10.8684	10.4849	13.4294	-10.48	10.2139	14.3679
3339	-10.8057	10.4612	13.3537	-10.484	10.2288	14.325
3340	-10.7444	10.4302	13.2603	-10.4913	10.2402	14.2769
3341	-10.6849	10.3915	13.1496	-10.5021	10.2478	14.2233
3342	-10.6274	10.3446	13.0222	-10.5164	10.2509	14.164
3343	-10.5724	10.2888	12.8785	-10.5342	10.2487	14.0987
3344	-10.5201	10.2238	12.7191	-10.5555	10.2405	14.0269
3345	-10.4713	10.1487	12.5446	-10.5803	10.2255	13.9483
3346	-10.4264	10.0629	12.3557	-10.6086	10.2028	13.8624
3347	-10.3863	9.96566	12.1528	-10.6402	10.1715	13.7686
3348	-10.3515	9.8562	11.9366	-10.6752	10.1307	13.6666
3349	-10.323	9.73371	11.7073	-10.7133	10.0794	13.5555
3350	-10.3014	9.59741	11.4655	-10.7545	10.0166	13.435
3351	-10.2876	9.44648	11.2114	-10.7985	9.94148	13.3042
3352	-10.2823	9.28016	10.9452	-10.8451	9.85303	13.1626
3353	-10.2865	9.09768	10.667	-10.8942	9.75038	13.0095
3354	-10.3007	8.89835	10.3768	-10.9454	9.63269	12.8443
3355	-10.3256	8.68153	10.0745	-10.9987	9.49914	12.6662
3356	-10.362	8.44666	9.76004	-11.0536	9.34902	12.4747
3357	-10.4103	8.19327	9.43316	-11.1099	9.18167	12.2691
3358	-10.4709	7.92102	9.0937	-11.1675	8.99653	12.0488
3359	-10.5441	7.62968	8.74147	-11.226	8.79313	11.8133
3360	-10.6301	7.31917	8.37632	-11.2851	8.5711	11.5621
3361	-10.7289	6.98955	7.99819	-11.3446	8.3302	11.2948
3362	-10.8406	6.64105	7.60708	-11.4043	8.0703	11.0111
3363	-10.9647	6.27406	7.20314	-11.4639	7.7914	10.7106
3364	-11.101	5.88915	6.78667	-11.5232	7.4936	10.3933
3365	-11.249	5.48706	6.35813	-11.582	7.17717	10.059
3366	-11.4081	5.06872	5.91819	-11.6402	6.84249	9.70783
3367	-11.5773	4.63519	5.4677	-11.6976	6.49007	9.3399
3368	-11.756	4.18774	5.00771	-11.754	6.12054	8.95549
3369	-11.943	3.72776	4.53948	-11.8094	5.73467	8.55498
3370	-12.1374	3.25678	4.06448	-11.8636	5.33335	8.13888
3371	-12.3378	2.77647	3.58432	-11.9166	4.91757	7.70783
3372	-12.5432	2.28858	3.1008	-11.9683	4.48842	7.26255
3373	-12.7522	1.79496	2.61582	-12.0187	4.0471	6.80393
3374	-12.9635	1.29751	2.1314	-12.0677	3.59489	6.33291
3375	-13.1758	0.798166	1.6496	-12.1153	3.13315	5.85059
3376	-13.3877	0.298882	1.17252	-12.1615	2.66329	5.35812
3377	-13.5979	-0.198409	0.702233	-12.2064	2.18677	4.85677
3378	-13.8051	-0.691809	0.240767	-12.2498	1.70511	4.34785
3379	-14.008	-1.17948	-0.209952	-12.2918	1.21983	3.83278
3380	-14.2055	-1.65969	-0.648125	-12.3323	0.732474	3.313
3381	-14.3962	-2.13077	-1.07211	-12.3714	0.244581	2.79001
3382	-14.5792	-2.59122	-1.48046	-12.4089	-0.24232	2.26532
3383	-14.7533	-3.03967	-1.87193	-12.4448	-0.726726	1.74048
3384	-14.9177	-3.47488	-2.24551	-12.4792	-1.20717	1.21702
3385	-15.0714	-3.8958	-2.6004	-12.5117	-1.68223	0.696482
3386	-15.2137	-4.30156	-2.93606	-12.5425	-2.15055	0.180359
3387	-15.3439	-4.69144	-3.25217	-12.5713	-2.61083	-0.329873
3388	-15.4613	-5.06491	-3.54864	-12.598	-3.06185	-0.832788
3389	-15.5655	-5.42162	-3.82559	-12.6226	-3.50246	-1.32702
3390	-15.6561	-5.76139	-4.08331	-12.6447	-3.9316	-1.81127
3391	-15.7328	-6.08417	-4.32227	-12.6643	-4.34832	-2.28432
3392	-15.7953	-6.39009	-4.54309	-12.6813	-4.75173	-2.74502
3393	-15.8437	-6.67941	-4.74649	-12.6953	-5.14106	-3.19234
3394	-15.8778	-6.9525	-4.93328	-12.7064	-5.51563	-3.62533
3395	-15.8979	-7.20983	-5.10432	-12.7143	-5.87487	-4.04313
3396	-15.9041	-7.45196	-5.26054	-12.7189	-6.2183	-4.44502
3397	-15.8967	-7.67951	-5.40284	-12.7201	-6.54554	-4.83035
3398	-15.8761	-7.89315	-5.53214	-12.7178	-6.85631	-5.19861
3399	-15.8429	-8.09359	-5.64933	-12.7119	-7.15042	-5.54938
3400	-15.7976	-8.28153	-5.75527	-12.7024	-7.42778	-5.88235
3401	-15.741	-8.45769	-5.85077	-12.6893	-7.68837	-6.19732
3402	-15.6736	-8.62274	-5.93659	-12.6727	-7.93229	-6.49418
3403	-15.5964	-8.77736	-6.01343	-12.6526	-8.15968	-6.77292
3404	-15.5102	-8.92216	-6.08196	-12.6291	-8.37079	-7.03363
3405	-15.4159	-9.0577	-6.14277	-12.6025	-8.56593	-7.27648
3406	-15.3145	-9.1845	-6.19643	-12.573	-8.74547	-7.50171
3407	-15.207	-9.303	-6.24345	-12.5407	-8.90985	-7.70964
3408	-15.0943	-9.41361	-6.28434	-12.5061	-9.05955	-7.90066
3409	-14.9775	-9.51663	-6.31955	-12.4694	-9.19513	-8.0752
3410	-14.8574	-9.61235	-6.34956	-12.4311	-9.31716	-8.23375
3411	-14.7352	-9.70097	-6.37479	-12.3914	-9.42626	-8.37685
3412	-14.6116	-9.78265	-6.39571	-12.3509	-9.5231	-8.50505
3413	-14.4876	-9.85752	-6.41276	-12.31	-9.60833	-8.61897
3414	-14.3639	-9.92564	-6.4264	-12.2691	-9.68266	-8.71921
3415	-14.2413	-9.98707	-6.43712	-12.2288	-9.74679	-8.8064
3416	-14.1203	-10.0418	-6.44539	-12.1893	-9.80142	-8.8812
3417	-14.0016	-10.0899	-6.45171	-12.1512	-9.84725	-8.94424
3418	-13.8856	-10.1313	-6.45659	-12.115	-9.88498	-8.99618
3419	-13.7726	-10.1661	-6.46053	-12.0809	-9.91527	-9.03766
3420	-13.6629	-10.1941	-6.46404	-12.0494	-9.93878	-9.06933
3421	-13.5565	-10.2155	-6.4676	-12.0209	-9.95611	-9.0918
3422	-13.4537	-10.2302	-6.47169	-11.9956	-9.96784	-9.10569
3423	-13.3542	-10.2382	-6.47672	-11.9738	-9.97451	-9.11159
3424	-13.2579	-10.2395	-6.48311	-11.9556	-9.97659	-9.11008
3425	-13.1647	-10.2342	-6.49117	-11.9413	-9.9745	-9.10171
3426	-13.0741	-10.2222	-6.50117	-11.9309	-9.96859	-9.08699
3427	-12.9859	-10.2037	-6.51329	-11.9245	-9.95916	-9.06644
3428	-12.8997	-10.1785	-6.52763	-11.9221	-9.94641	-9.0405
3429	-12.815	-10.1467	-6.54419	-11.9236	-9.93046	-9.0096
3430	-12.7313	-10.1083	-6.56283	-11.9289	-9.91138	-8.97415
3431	-12.6483	-10.0632	-6.58335	-11.9377	-9.88911	-8.93447
3432	-12.5655	-10.0114	-6.60539	-11.95	-9.86354	-8.89089
3433	-12.4825	-9.95271	-6.62849	-11.9654	-9.83444	-8.84366
3434	-12.399	-9.88698	-6.65205	-11.9835	-9.80151	-8.79297
3435	-12.3148	-9.81401	-6.67538	-12.0041	-9.76435	-8.73897
3436	-12.2297	-9.73354	-6.69766	-12.0268	-9.72248	-8.68176
3437	-12.1435	-9.64527	-6.71797	-12.0512	-9.67533	-8.62135
3438	-12.0563	-9.54884	-6.73532	-12.0768	-9.62226	-8.55769
3439	-11.9681	-9.44383	-6.74859	-12.1031	-9.56253	-8.49068
3440	-11.8793	-9.3298	-6.75662	-12.1298	-9.49537	-8.42011
3441	-11.7901	-9.20623	-6.75821	-12.1564	-9.41993	-8.34571
3442	-11.701	-9.07259	-6.75207	-12.1824	-9.33532	-8.26712
3443	-11.6125	-8.92832	-6.73691	-12.2073	-9.24059	-8.18393
3444	-11.5253	-8.77284	-6.71143	-12.2308	-9.13479	-8.09559
3445	-11.4401	-8.60556	-6.6743	-12.2524	-9.01694	-8.00152
3446	-11.3577	-8.42589	-6.62423	-12.2718	-8.88607	-7.90104
3447	-11.2789	-8.23326	-6.55994	-12.2885	-8.7412	-7.79338
3448	-11.2045	-8.02714	-6.48015	-12.3023	-8.5814	-7.67771
3449	-11.1356	-7.80702	-6.38367	-12.3128	-8.40577	-7.55315
3450	-11.0728	-7.57245	-6.26931	-12.3197	-8.21347	-7.41873
3451	-11.0172	-7.32305	-6.13596	-12.323	-8.00372	-7.27348
3452	-10.9694	-7.0585	-5.98256	-12.3224	-7.77584	-7.11634
3453	-10.9301	-6.77858	-5.80811	-12.3177	-7.52924	-6.94628
3454	-10.8999	-6.48314	-5.61169	-12.3089	-7.26342	-6.76225
3455	-10.8794	-6.17212	-5.39242	-12.2959	-6.97802	-6.5632
3456	-10.8689	-5.84559	-5.14952	-12.2788	-6.67282	-6.34813
3457	-10.8686	-5.50368	-4.88229	-12.2575	-6.3477	-6.11609
3458	-10.8785	-5.14664	-4.59011	-12.2323	-6.00273	-5.8662
3459	-10.8987	-4.77481	-4.27244	-12.2031	-5.63809	-5.59765
3460	-10.9289	-4.38863	-3.92886	-12.1702	-5.25414	-5.30977
3461	-10.9687	-3.98862	-3.55904	-12.1337	-4.85138	-5.00199
3462	-11.0176	-3.57539	-3.16277	-12.094	-4.43046	-4.67392
3463	-11.075	-3.14964	-2.73997	-12.0511	-3.99217	-4.32529
3464	-11.1402	-2.71211	-2.2907	-12.0055	-3.53746	-3.95602
3465	-11.2123	-2.26363	-1.81517	-11.9575	-3.06742	-3.56623
3466	-11.2904	-1.80507	-1.31376	-11.9073	-2.58323	-3.1562
3467	-11.3735	-1.33737	-0.787021	-11.8552	-2.08623	-2.72643
3468	-11.4607	-0.861481	-0.235708	-11.8017	-1.57783	-2.27763
3469	-11.5508	-0.37842	0.339224	-11.7471	-1.05955	-1.81066
3470	-11.6429	0.110777	0.936603	-11.6916	-0.532982	-1.32663
3471	-11.7359	0.605043	1.55503	-11.6358	0.000225914	-0.826803
3472	-11.8288	1.10329	2.19288	-11.5798	0.538375	-0.312623
3473	-11.9207	1.6044	2.84828	-11.524	1.07974	0.214301
3474	-12.0107	2.10726	3.51913	-11.4688	1.62257	0.752213
3475	-12.0979	2.61071	4.2031	-11.4143	2.16512	1.29923
3476	-12.1817	3.11361	4.89763	-11.3609	2.70567	1.85337
3477	-12.2614	3.61477	5.59996	-11.3089	3.24251	2.41256
3478	-12.3364	4.11303	6.30712	-11.2584	3.77398	2.97465
3479	-12.4064	4.60721	7.016	-11.2096	4.29848	3.53747
3480	-12.471	5.0961	7.72329	-11.1626	4.81445	4.09882
3481	-12.5299	5.57853	8.42562	-11.1177	5.32043	4.65654
3482	-12.583	6.05332	9.11951	-11.075	5.81504	5.20845
3483	-12.6303	6.51928	9.80141	-11.0343	6.29696	5.75246
3484	-12.6717	6.97526	10.4678	-10.996	6.765	6.28655
3485	-12.7075	7.42012	11.1151	-10.9598	7.21807	6.80879
3486	-12.7378	7.85273	11.7399	-10.9259	7.65515	7.31735
3487	-12.7628	8.27204	12.3389	-10.8942	8.07537	7.81053
3488	-12.7829	8.67699	12.9089	-10.8646	8.47794	8.2868
3489	-12.7984	9.06662	13.4468	-10.8371	8.8622	8.74473
3490	-12.8097	9.43999	13.9499	-10.8115	9.22761	9.18309
3491	-12.8171	9.79627	14.4156	-10.7877	9.57371	9.60081
3492	-12.821	10.1347	14.8418	-10.7656	9.90017	9.99697
3493	-12.8219	10.4546	15.2265	-10.745	10.2068	10.3708
3494	-12.8201	10.7553	15.5682	-10.7258	10.4934	10.7219
3495	-12.816	11.0365	15.8658	-10.7079	10.7601	11.0497
3496	-12.8098	11.2977	16.1184	-10.691	11.0069	11.354
3497	-12.802	11.5387	16.3258	-10.675	11.234	11.6348
3498	-12.7927	11.7594	16.4879	-10.6598	11.4418	11.8921
3499	-12.7821	11.9598	16.6053	-10.6451	11.6305	12.1262
3500	-12.7705	12.1401	16.6788	-10.631	11.8007	12.3374
3501	-12.7578	12.3005	16.7097	-10.6171	11.9529	12.5263
3502	-12.7442	12.4415	16.6996	-10.6036	12.0878	12.6933
3503	-12.7297	12.5635	16.6506	-10.5901	12.206	12.8393
3504	-12.7142	12.6673	16.5649	-10.5767	12.3082	12.9649
3505	-12.6976	12.7535	16.4451	-10.5634	12.3954	13.0711
3506	-12.6797	12.8231	16.2942	-10.55	12.4683	13.1587
3507	-12.6604	12.8769	16.1152	-10.5367	12.5279	13.2286
3508	-12.6394	12.916	15.9113	-10.5233	12.5751	13.282
3509	-12.6165	12.9415	15.6858	-10.51	12.6107	13.3198
3510	-12.5915	12.9545	15.4421	-10.4969	12.6359	13.3432
3511	-12.5639	12.9561	15.1837	-10.4839	12.6515	13.353
3512	-12.5336	12.9475	14.9139	-10.4712	12.6585	13.3505
3513	-12.5002	12.9298	14.6359	-10.459	12.6578	13.3366
3514	-12.4634	12.9042	14.353	-10.4473	12.6504	13.3124
3515	-12.423	12.8717	14.068	-10.4363	12.6371	13.2789
3516	-12.3786	12.8334	13.7837	-10.4262	12.6188	13.2371
3517	-12.3302	12.7902	13.5026	-10.417	12.5962	13.1879
3518	-12.2775	12.7429	13.2269	-10.409	12.5701	13.1323
3519	-12.2204	12.6923	12.9586	-10.4024	12.541	13.071
3520	-12.1588	12.639	12.6992	-10.3972	12.5095	13.005
3521	-12.0928	12.5835	12.45	-10.3935	12.4762	12.935
3522	-12.0224	12.5261	12.212	-10.3916	12.4414	12.8616
3523	-11.9477	12.467	11.9856	-10.3915	12.4052	12.7855
3524	-11.869	12.4064	11.7712	-10.3933	12.3681	12.7072
3525	-11.7866	12.344	11.5686	-10.3971	12.3299	12.6272
3526	-11.7009	12.2797	11.3773	-10.4029	12.2906	12.5459
3527	-11.6123	12.213	11.1966	-10.4107	12.2501	12.4635
3528	-11.5215	12.1434	11.0254	-10.4205	12.2081	12.3804
3529	-11.429	12.0702	10.8624	-10.4323	12.1642	12.2967
3530	-11.3356	11.9926	10.7059	-10.4461	12.1179	12.2123
3531	-11.242	11.9097	10.5543	-10.4618	12.0687	12.1272
3532	-11.1492	11.8206	10.4053	-10.4792	12.0159	12.0412
3533	-11.058	11.724	10.2569	-10.4984	11.9587	11.9541
3534	-10.9694	11.6188	10.1068	-10.519	11.8962	11.8655
3535	-10.8843	11.5038	9.95241	-10.5411	11.8276	11.7749
3536	-10.8037	11.3778	9.79141	-10.5645	11.7519	11.6818
3537	-10.7287	11.2396	9.62129	-10.5889	11.668	11.5855
3538	-10.6601	11.088	9.43959	-10.6143	11.5751	11.4852
3539	-10.5991	10.9217	9.24395	-10.6405	11.4719	11.3802
3540	-10.5463	10.7398	9.0321	-10.6673	11.3575	11.2697
3541	-10.5027	10.5412	8.80192	-10.6945	11.2309	11.1525
3542	-10.4691	10.325	8.55152	-10.722	11.0911	11.0279
3543	-10.4461	10.0904	8.27921	-10.7497	10.937	10.8947
3544	-10.4342	9.83692	7.98359	-10.7774	10.7679	10.752
3545	-10.434	9.56401	7.66359	-10.8051	10.583	10.5987
3546	-10.4456	9.27143	7.31844	-10.8326	10.3814	10.4339
3547	-10.4694	8.95909	6.94779	-10.8599	10.1626	10.2565
3548	-10.5052	8.62709	6.55163	-10.8869	9.92616	10.0657
3549	-10.553	8.27574	6.13038	-10.9137	9.67158	9.86057
3550	-10.6127	7.90554	5.68487	-10.9401	9.39863	9.64037
3551	-10.6837	7.51716	5.21634	-10.9662	9.1072	9.40442
3552	-10.7655	7.1115	4.72642	-10.9922	8.79727	9.15215
3553	-10.8577	6.68961	4.21715	-11.0179	8.46902	8.88311
3554	-10.9593	6.2527	3.6909	-11.0436	8.1227	8.59699
3555	-11.0697	5.80215	3.1504	-11.0692	7.75877	8.29362
3556	-11.1878	5.33944	2.59864	-11.095	7.37776	7.97297
3557	-11.3128	4.86618	2.03885	-11.1209	6.98038	7.63516
3558	-11.4437	4.38406	1.47444	-11.1472	6.56744	7.28049
3559	-11.5793	3.89485	0.908956	-11.1739	6.13986	6.90937
3560	-11.7188	3.40033	0.345973	-11.2012	5.6987	6.5224
3561	-11.861	2.90232	-0.210932	-11.2291	5.24509	6.12031
3562	-12.0049	2.40264	-0.758263	-11.2577	4.78026	5.70397
3563	-12.1496	1.90306	-1.29267	-11.2872	4.30553	5.27438
3564	-12.2941	1.40531	-1.81102	-11.3175	3.82227	4.83268
3565	-12.4376	0.911053	-2.31043	-11.3487	3.33192	4.3801
3566	-12.5792	0.421864	-2.78834	-11.3808	2.83595	3.91797
3567	-12.718	-0.0607834	-3.24257	-11.4137	2.33589	3.4477
3568	-12.8535	-0.535528	-3.67133	-11.4475	1.83326	2.97079
3569	-12.9849	-1.00113	-4.07324	-11.4821	1.32961	2.48877
3570	-13.1115	-1.45648	-4.44736	-11.5173	0.82649	2.00319
3571	-13.233	-1.9006	-4.79322	-11.5531	0.32543	1.51567
3572	-13.3487	-2.33264	-5.11076	-11.5893	-0.172055	1.02777
3573	-13.4581	-2.75189	-5.40036	-11.6257	-0.664484	0.541089
